# Supplementary material for: Genetic and Cultural Reconstruction of the Migration of an Ancient Lineage
Source: Hindawi journal article supplement (doi:10.1155/2015/651415), 2015-01-01
Supplement: f1 [file 651415.f1.pdf]

## Supplemental Files

TABLE S1: Inclusion and exclusion SNPs used in haplotype assignment.  
TABLE S2: Short tandem repeats (STRs) tested  
TABLE S3. Comunidades of Salcete (1848): vangor listing  
TABLE S4. List of vangor families for Lotli, Rai and Kudtari towns  
TABLE S5. Baptismal records for Lotli town (1914-1932)  
TABLE S6. Electoral rolls for KAMAT and PAI lineages (2013)  
TABLE S7. TMRCA segmentation table  
TABLE S8. STRa incidence table  
TABLE S9. R1a1 subclades by geographic region  
TABLE S10. Centroid data table  
TABLE S11. Fellow traveller haplogroups: Transcaucasia to India  
FILE S12. STR drift: Transcaucasia to India  
TABLE S13. WP-BRW findspots  
TABLE S14. Copper hoard findspots  
TABLE S15. Channel-spouted bowl findspots  
TABLE S16. Votive tanks findspots  
TABLE S17. Toponym table  
TABLE S18. Harappan animal seal styles  
TABLE S19. Tribal coins: Northwest region  
TABLE S20. Indo-Persian borderlands coins  
TABLE S21. Sacred texts: word incidence  
TABLE S22. Harappan symbols table  
TABLE S23. Tripitaka census table  
TABLE S24. Listing of vibhedas (Skanda Purana)  
TABLE S25. Gotra: incidence by community  
TABLE S26. Tribal gene introgression  
FILE S27. Religious traditions in medieval Saurashtra.  
FILE S28. Attested Mihira clan locations (5<sup>th</sup>-8<sup>th</sup> centuries CE).  
TABLE S29. Varaha (Chalukya) style Aditya temples  
TABLE S30. Ramnath, Manganath, Siddhanath temples (Gujarat)  
TABLE S31. Male deities in Salcete temples in 1567 (Portuguese Inquisition)  
TABLE S32. First names of 16<sup>th</sup> century Lotli Brahmins  
TABLE S33. West-east gotra gradient  
TABLE S34. Bhaskara Maithili cohort gotras (7<sup>th</sup> century)  
TABLE S35. Orissa donee gotra listing (8-11<sup>th</sup> centuries)  
TABLE S36. Vangor conversion rate  
TABLE S37. Godfathers of converts prior to 1590  
TABLE S38. Ordination of catholic priests of Lotli town (18<sup>th</sup>-20<sup>th</sup> century)  
TABLE S39. Vangor extinction rate  
TABLE S40. Economic elites in South Asia  
FILE S41. Western cultural corridor: ancient period  
FILE S42. Western cultural corridor: Mitra-Varuna tradition (Kaundinya)  
FILE S43. Saurashtran worship and Arab invasions (8<sup>th</sup> century CE).

**TABLE S1: Inclusion (shaded) and exclusion SNPs used in haplotype assignment.**

**Backbone SNPs: (highlighted SNPs are for R1a1 Y-haplogroup)**

|                                                                                                                                                                                                                                                                                               |                                                                                                                                                                                                                                                                             |
|-----------------------------------------------------------------------------------------------------------------------------------------------------------------------------------------------------------------------------------------------------------------------------------------------|-----------------------------------------------------------------------------------------------------------------------------------------------------------------------------------------------------------------------------------------------------------------------------|
| <p>L62 A &gt; G<br/> M11 A &gt; G<br/> M122 T &gt; C<br/> M130 C &gt; T<br/> M168 C &gt; T<br/> M170 A &gt; C<br/> M173 A &gt; C<br/> M174 T &gt; C<br/> M175 TTCTC del<br/> M201 G &gt; T<br/> M207 A &gt; G<br/> M214 T &gt; C<br/> M230 T &gt; A<br/> M231 G &gt; A<br/> M242 C &gt; T</p> | <p>M304 A &gt; C<br/> M343 C &gt; A<br/> M45 G &gt; A<br/> M479 C &gt; T C Negative<br/> M60 T ins<br/> M69 T &gt; C<br/> M70 A &gt; C<br/> M89 C &gt; T<br/> M9 C &gt; G<br/> M91 T del<br/> M96 G &gt; C<br/> P256 G &gt; A<br/> SRY10831.1 A &gt; G<br/> SRY10831.2A</p> |
|-----------------------------------------------------------------------------------------------------------------------------------------------------------------------------------------------------------------------------------------------------------------------------------------------|-----------------------------------------------------------------------------------------------------------------------------------------------------------------------------------------------------------------------------------------------------------------------------|

**R1a1a1h1a subclade:**

|                                                                                                                                                                                                   |                                                                                                                                                                           |
|---------------------------------------------------------------------------------------------------------------------------------------------------------------------------------------------------|---------------------------------------------------------------------------------------------------------------------------------------------------------------------------|
| <p>L175 CTGTdel<br/> L260 G &gt; T<br/> L342.2 A &gt; G<br/> L365 T &gt; C<br/> L366 TAACdel<br/> L657 G &gt; A<br/> M157.1 A &gt; C<br/> M198 C &gt; T<br/> M334 C &gt; A<br/> M417 G &gt; A</p> | <p>M434 G &gt; A<br/> M458 A &gt; G<br/> M56 A &gt; T<br/> M87 T &gt; C<br/> P278.2 G &gt; A<br/> P98 C &gt; T<br/> PK5 C &gt; T<br/> Z280 C &gt; T<br/> Z93 G &gt; A</p> |
|---------------------------------------------------------------------------------------------------------------------------------------------------------------------------------------------------|---------------------------------------------------------------------------------------------------------------------------------------------------------------------------|

**J2a4b subclade:**

|                                                                                                                                                                                                                 |                                                                                                                                                                                |
|-----------------------------------------------------------------------------------------------------------------------------------------------------------------------------------------------------------------|--------------------------------------------------------------------------------------------------------------------------------------------------------------------------------|
| <p>M12 G<br/> M172 T &gt; G<br/> M205 T<br/> M241 G<br/> M267 T &gt; G<br/> M280 G<br/> M319 T<br/> M321 C<br/> M339 T<br/> M340 G<br/> M365 A<br/> M390 No A Ins<br/> M410 A &gt; G<br/> M419 No AAAAG del</p> | <p>M47 G<br/> M62 T<br/> M67 A &gt; T<br/> M68 A<br/> M99 No A del<br/> P279 G<br/> P56 A<br/> P58 T<br/> P81 C<br/> P84 C<br/> L24 G<br/> L26 T &gt; C<br/> L136 No T del</p> |
|-----------------------------------------------------------------------------------------------------------------------------------------------------------------------------------------------------------------|--------------------------------------------------------------------------------------------------------------------------------------------------------------------------------|

**Other subclades:**

|                                                                                  |                                                                      |
|----------------------------------------------------------------------------------|----------------------------------------------------------------------|
| <p>M124 C &gt; T<br/> L295 G &gt; A<br/> L294 A &gt; T<br/> M20 G<br/> M76 T</p> | <p>M274 C<br/> M317 No GA del<br/> M349 G<br/> M357 A<br/> PK3 T</p> |
|----------------------------------------------------------------------------------|----------------------------------------------------------------------|

**TABLE S2: Short tandem repeats (STRs) tested\*.**

|          |          |          |          |          |           |         |          |          |          |
|----------|----------|----------|----------|----------|-----------|---------|----------|----------|----------|
| DYS 19   | DYS 385a | DYS 385b | DYS 388  | DYS 389i | DYS 389ii | DYS 390 | DYS 391  | DYS 392  | DYS 393  |
| DYS 413a | DYS 413b | DYS 426  | DYS 436  | DYS 437  | DYS 438   | DYS 439 | DYS 442  | DYS 444  | DYS 445  |
| DYS 446  | DYS 447  | DYS 448  | DYS 449  | DYS 450  | DYS 452   | DYS 453 | DYS 454  | DYS 455  | DYS 456  |
| DYS 458  | DYS 459a | DYS 459b | DYS 460  | DYS 461  | DYS 462   | DYS 463 | DYS 464a | DYS 464b | DYS 464c |
| DYS 468  | DYS 472  | DYS 481  | DYS 485  | DYS 492  | DYS 511   | DYS 518 | DYS 520  | DYS 522  | DYS 527a |
| DYS 527b | DYS 531  | DYS 534  | DYS 537  | DYS 540  | DYS 557   | DYS 565 | DYS 570  | DYS 568  | DYS 576  |
| DYS 578  | DYS 588  | DYS 590  | DYS 607  | DYS 612  | DYS 614   | DYS 640 | DYS 641  | DYS 644  | DYS710   |
| DYS 711  | DYS 724a | DYS 724b | GATA A10 | GATA C4  | GATA H4   | YCA IIa | YCA IIb  |          |          |

\* Not all samples were tested for all STRs.

Table S3. **Comunidades of Salcete (1848): Vangors** [from ref 1]. Subject towns of this study are highlighted.

| Town / Village            | Original  | Extinct   | Brahmin   | Chardo   | Other    |
|---------------------------|-----------|-----------|-----------|----------|----------|
| Aquem                     | 3         | 0         | 2         | 1        | 0        |
| Benaulim                  | 12        | 2         | 10        | 0        | 0        |
| Betalbatim                | 5         | 0         | 0         | 5        | 0        |
| Calata                    | 5         | 0         | 0         | 5        | 0        |
| Camorlim                  | 8         | 0         | 0         | 8        | 0        |
| Cansaulim                 | 10        | 8         | ?         | ?        | ?        |
| Canna                     | 3         | 0         | 0         | 3        | 0        |
| Carmona                   | 10        | 0         | 0         | 10       | 0        |
| Cavelossim                | 10        | 0         | 0         | 0        | 10       |
| Cavorim                   | 4         | 1         | 0         | 3        | 0        |
| Chandor                   | 4         | 1         | 0         | 3        | 0        |
| Chicalim                  | 2         | 0         | 2         | 0        | 0        |
| Chicolna                  | 3         | 2         | 0         | 1        | 0        |
| Chinchinim                | 8         | 0         | 0         | 7        | 1        |
| Coelim                    | 6         | 0         | 0         | 6        | 0        |
| Collua                    | 5         | 3         | 0         | 3        | 0        |
| Cortalim                  | 24        | 17        | 6         | 1        | 0        |
| <b>Curtorim (Kudtari)</b> | <b>20</b> | <b>1</b>  | <b>19</b> | <b>0</b> | <b>0</b> |
| Dabolim                   | 2         | 2         | 0         | 0        | 0        |
| Dramapur                  | 5         | 0         | 1         | 0        | 4        |
| Davorlim                  | 15        | 0         | 0         | 1        | 14       |
| Deussua                   | 10        | 1         | 0         | 4        | 5        |
| Dicarpale                 | 19        | 12        | 0         | 0        | 7        |
| Doncolim                  | 3         | 0         | 0         | 3        | 0        |
| Gandaulim                 | 3         | 0         | 0         | 3        | 0        |
| Gonsua                    | 3         | 0         | 0         | 3        | 0        |
| Guirdolim                 | 4         | 1         | 3         | 0        | 0        |
| Hissorim                  | 3         | 1         | 0         | 1        | 1        |
| <b>Loutolim (Lotli)</b>   | <b>26</b> | <b>23</b> | <b>23</b> | <b>0</b> | <b>0</b> |
| Macazana                  | 3         | 0         | 3         | 0        | 0        |
| Majorda                   | 10        | 0         | 0         | 10       | 0        |
| Margao                    | 28        | 6         | 22        | 0        | 0        |
| Mormugao                  | 3         | 0         | 0         | 3        | 0        |
| Nagoa                     | 14        | 7         | 7         | 0        | 0        |
| Orlim                     | 5         | 0         | 0         | 5        | 0        |
| Palle                     | 5         | 0         | 0         | 5        | 0        |
| Quelossim                 | 8         | 5         | 3         | 0        | 0        |
| <b>Raia (Rai)</b>         | <b>14</b> | <b>2</b>  | <b>12</b> | <b>0</b> | <b>0</b> |
| Sancoale                  | 14        | 0         | 14        | 0        | 0        |

|            |    |    |    |    |    |
|------------|----|----|----|----|----|
| Sarzora    | 4  | 0  | 0  | 4  | 0  |
| Seraulim   | 6  | 2  | 0  | 4  | 0  |
| Sernabatim | 5  | 2  | 0  | 3  | 0  |
| Sirlim     | 7  | 0  | 0  | 0  | 7  |
| Telaulim   | 12 | 0  | 0  | 0  | 12 |
| Vaddem     | 5  | 0  | 5  | 0  | 0  |
| Vanelim    | 4  | 2  | 0  | 2  | 0  |
| Varca      | 10 | 0  | 0  | 10 | 0  |
| Velcao     | 6  | 0  | 0  | 6  | 0  |
| Verna      | 48 | 19 | 29 | 0  | 0  |
| Utorda     | 4  | 0  | 0  | 4  | 0  |

References:

1. Xavier, Filipe Nery (1848) *Comunidades de Salcete*. Bosquejo Historico.

Table S4. List of vangor families for Lotli, Rai and Kudtari towns

Town: Lotli (Loutolim)

[Source: Primeiro Cristaos em Salcete. Oriente Portuguez

| VANGOD | Ancestral Name | Post-Conversion  | Name of Early Convert |
|--------|----------------|------------------|-----------------------|
| 1      | KINI           | LOBO             |                       |
| 2      | PAI            | COSTA            | Antonio da Costa      |
| 3      | SINAI?         | GOMES            |                       |
| 3      |                | MIRANDA          |                       |
| 4      | SINAI?         | MENEZES          |                       |
| 5      | PAI            | VALADARES        | Joao de Valadares     |
| 5      |                | VAZ              |                       |
| 6      | NAYAK          | MENDANHA         |                       |
| 6      | NAYAK          | SILVA            |                       |
| 7      | PAI            | SA               | Pantaleao de Sa       |
| 8      | PAI            | MASCARENHAS      | Jerónimo Mascarenhas  |
| 8      |                | CARVALHO         |                       |
| 9      | NAYAK?         | ALVES            |                       |
| 9      |                | BAPTISTA         |                       |
| 9      |                | CRUZ             |                       |
| 9      |                | CARDOSO          |                       |
| 9      |                | NORONHA          |                       |
| 10     | PAI            | COLACO (extinct) | Pedro Colaco          |
| 11     | NAYAK          | (extinct)        |                       |
| 12     | PAI            | ARAUJO           |                       |
| 12     | PAI            | BARRETO          |                       |
| 12     | PAI            | MAGALHAES        |                       |
| 13     | NAYAK?         | BRITO            |                       |
| 13     |                | CRUZ             |                       |
| 13     |                | FARIA            |                       |
| 13     |                | QUADROS          |                       |
| 14     | NAYAK?         | REGO             |                       |
| 15     | PAI?           | MONTEIRO         |                       |

Note: 11 vangors added by merger with adjacent village of Racaim in 1627 were excluded from this list.

Town: Rai (Raia)

[Source: Primeiro Cristaos em Salcete. Oriente Portuguez

| VANGOD | Ancestral | Post-Conversion | Name of Early Convert |
|--------|-----------|-----------------|-----------------------|
|--------|-----------|-----------------|-----------------------|

|    |       |              |                        |
|----|-------|--------------|------------------------|
|    |       |              |                        |
| 1  | PAI   | ESTEVAO      | Thomas Estevao         |
| 1  | PAI   | ALBUQUERQUE  | Mathias de Albuquerque |
| 2  | KAMAT | VIEGAS       | Amador Viegas          |
| 2  | KAMAT | PEREIRA      | Goncalo Pereira        |
| 3  | PAI   | QUADROS      | Antonio de Quadros     |
| 3  | PAI   | LIMA (LEMOS) | Francisco de Lima      |
| 4? | SINAI | extinct?     |                        |
| 5? | PAI   | PARRAS       | Pedro Parras           |
| 5? | PAI   | PEREIRA      | Bernardo Pereira       |
| 5? | PAI   | GONCALVES    | Manuel Goncalves       |
| 5? | PAI   | BARBOSA      | Sebastiao Barbosa      |
| 5? | PAI   | COUTINHO     | Antonio Coutinho       |
| 5? | PAI   | RANGEL       | Joao Rangel            |
| 6? | NAYAK | DIAS?        |                        |
| 7? | MALO  | extinct?     |                        |
| 8? | PAI   | ??           |                        |
| 9  | NAYAK | MENEZES      | Lourenco de Menezes    |
| 9  | NAYAK | FERNANDES    | Agostinho Fernandes    |
| 10 | KAMAT | SOUZA        | Joao de Souza          |
| 10 | KAMAT | VALERIANO    | Aleixo Valeriano       |
| 11 | PAI   | MONIZ        | Antonio Moniz          |
| 12 | KAMAT | FALEIRO      | Manuel Faleiro         |
| 13 | PAI   | MENDONCA?    |                        |

### Town: Kudtari (Curtorim)

| VANGOD | Ancestral | Post-Conversion | Name of Early Convert |
|--------|-----------|-----------------|-----------------------|
| 1      | KAMAT     | MENEZES         | Aleixo de Menezes     |
| 1      | KAMAT     | BORGES          | Joao Borges           |
| 2      | PAI       | XAVIER          |                       |
| 2      | PAI       | COSTA           |                       |
| 3      | KAMAT     | VAZ             |                       |
| 4      | KAMAT     | FERNANDES       | Brizio Fernandes      |
| 4      | KAMAT     | GOMINDES        | Aleixo Gomindes       |

|    |         |           |                      |
|----|---------|-----------|----------------------|
| 5  | KAMAT   | DINIZ     | Agostinho Diniz      |
| 6  | PAI     | COELHO    |                      |
| 6  | PAI     | MENEZES   | Alexandre de Menezes |
| 7  | KAMAT   | COSTA     |                      |
| 8  | KAMAT   | PIMENTA   |                      |
| 8  | KAMAT   | COSTA     | Lourenco da Costa    |
| 9  | KAMAT   | ESTIBEIRO |                      |
| 10 | KAMAT   | SARDINHA  |                      |
| 10 | KAMAT   | CRUZ      |                      |
| 11 | NAYAK   | LUIS      | Francisco Luis       |
| 12 | KAMAT   | BARRETO   | Francisco Barreto    |
| 12 | KAMAT   | FERNANDES | Brizio Fernandes     |
| 12 | KAMAT   | ANDRADE   |                      |
| 13 | PAI     | RODRIGUES | Goncalo Rodrigues    |
| 14 | KAMAT   | VEIGA     | Manuel de Veiga      |
| 15 | KAMAT   | PAES      |                      |
| 16 | KAMAT   | COSTA     | Antonio da Costa     |
| 16 | KAMAT   | VIEGAS    |                      |
| 17 | KAMAT   | COSTA     | Antonio da Costa     |
| 18 | PAI     | BRITO     | Antonio de Brito     |
| 19 | UNKNOWN | LOURENCO  |                      |



Table S5. **Baptismal records for Lotli town (1914-1932).** Handwritten Portuguese baptismal records for founder LPK families for the period 1914 through 1932+ were obtained from the Lotli parish church (Salvador do Mundo), translated and transcribed.

| Family      | Birth     | Baptism   | Child                                      | Father                             |
|-------------|-----------|-----------|--------------------------------------------|------------------------------------|
| MONTEIRO    | 14-Apr-14 | 14-Apr-14 | Isidoro Francisco Aleixo Manoel Monteiro   | Rosario Mariano Alleluia Monteiro  |
| ARAUJO      | 20-Jan-14 | 15-Apr-14 | Maria Luzia Araujo                         | Joao Caetano Sebastiao Eduardo /   |
| MASCARENHAS | 5-May-14  | 14-May-14 | Maria Carolina Alda de Araujo Mascarenhas  | Joaquim Lourenco de Araujo Masc    |
| MONTEIRO    | 7-Nov-14  | 22-Nov-14 | Agostinho Francisco Esmeraldo Monteiro     | Joao Cosme Damiao Bossuet Mont     |
| DE SA       | 22-Nov-14 | 2-Dec-14  | Maria Podenciana Quiteria do Rosario e Sa  | Jeronimo Gabriel de Sa             |
| VALADARES   | 31-Jan-15 | 21-Feb-15 | Piedade Sofia Valadares                    | Joaquim Sebastiao Valadares        |
| DE SA       | 23-Mar-15 | 30-Mar-15 | Lourenco Manuel de Sa                      | Antonio de Sa                      |
| MONTEIRO    | 16-Apr-15 | 25-Apr-15 | Francisco Agostinho Gracias Monteiro       | Cesar Baronio da Conceicao Monte   |
| ARAUJO      | 18-Apr-15 | 25-Apr-15 | Dominginho Anselmo de Araujo               | Jose Pascoal Araujo                |
| MONTEIRO    | 12-Apr-15 | 9-May-15  | Julio Cesar Francisco Monteiro             | Joaquim Heliodoro Bernadino Mont   |
| ARAUJO      | 18-Jul-15 | 25-Jul-15 | Joao Vicente Francisco Camilo Teles Araujo | Joaquim Mariano Hilario dos Milagr |
| MONTEIRO    | 26-Apr-15 | 2-Aug-15  | Ana Margarida Maria Monteiro               | Isidoro dos Remedios Santana Mor   |
| VALADARES   | 24-Nov-15 | 30-Nov-15 | Etelvina Joaninha da Piedade Valadares     | Vinancio Francisco da Piedade Val  |
| ARAUJO      | 10-Nov-15 | 5-May-16  | Maria Quiteria Felicidade Araujo           | Joao Caetano Sebastiao Eduardo /   |
| MASCARENHAS | 10-Aug-16 | 17-Aug-16 | Maria Pasciencia Carolina Mascarenhas      | Pedro Sebastiao Teofilo Mascarent  |
| MASCARENHAS | 20-May-16 | 10-Sep-16 | Constancio Bernardo Santana Mascarenhas    | Jose Pedrinho Teotonio Mascarent   |
| MONTEIRO    | 6-Oct-16  | 18-Dec-16 | Telruno Joao Baptista Lino Monteiro        | Vinancio Bernardo Ubaldino Monte   |
| MONTEIRO    | 27-Jan-17 | 1-Feb-17  | Maria Teresa Herminia Gracias Monteiro     | Cesar Baronio da Conceicao Monte   |
| MONTEIRO    | 18-Mar-17 | 21-Mar-17 | Alvaro Bossuet Monteiro                    | Joao Cosme Damiao Bossuet Mont     |
| ARAUJO      | 15-May-17 | 22-May-17 | Exaltacao Nicolau Mariano D'Araujo         | Joao Caetano Sebastiao Eduardo /   |
| ARAUJO      | 15-Sep-17 | 22-Sep-17 | Amelia Prudencia Araujo                    | Jose Pascoal Araujo                |
| MONTEIRO    | 11-Sep-17 | 28-Sep-17 | Prudencia Helena Monteiro                  | Joaquim Heliodoro Bernadino Mont   |
| MASCARENHAS | 5-Mar-18  | 5-Mar-18  | Vicente Caetano Francisco Mascarenhas      | Jose Pedrinho Teotonio Mascarent   |
| MONTEIRO    | 12-Aug-18 | 18-Aug-18 | Francisco Sebastiao Gracias Monteiro       | Cesar Baronio da Conceicao Monte   |
| MONTEIRO    | 20-Dec-18 | 26-Dec-18 | Sedonio Pais Monteiro                      | Joaquim Heliodoro Bernadino Mont   |
| MASCARENHAS | 15-Oct-18 | 28-Dec-18 | Leopoldinha Senhorinha Mascarenhas         | Jose Salvador Mascarenhas          |
| MASCARENHAS | 31-Dec-18 | 8-Jan-19  | Manuel Fr. Xavier Gavino Mascarenhas       | Pedro Sebastiao Teofilo Mascarent  |
| MONTEIRO    | 19-Jan-19 | 27-Jan-19 | Mario do Coracao de Jesus Bossuet Monteiro | Joao Cosme Damiao Bossuet Mont     |
| ARAUJO      | 27-Dec-18 | 1-Mar-19  | Joao Sebastiao de Jesus Araujo             | Joaquim Mariano Hilario dos Milagr |
| MONTEIRO    | 8-Jan-19  | 1-Mar-19  | Jose Joaquim Santana Monteiro              | Joaquim Filipe de Araujo Monteiro  |
| ARAUJO      | 3-Nov-18  | 19-May-19 | Pedro Joaquim Sebastiao Araujo             | Joao Caetano Sebastiao Eduardo /   |
| ARAUJO      | 3-Aug-19  | 10-Aug-19 | Teresinha Escolastica Araujo               | Jose Pascoal Araujo                |
| MONTEIRO    | 21-Oct-19 | 28-Oct-19 | Hilario Joaquim Victorino Monteiro         | Rosario Mariano Alleluia Monteiro  |
| MONTEIRO    | 22-Nov-19 | 29-Nov-19 | Rosario Manuel Monteiro                    | Vinancio Bernardo Ubaldino Monte   |
| MASCARENHAS | 26-Dec-19 | 27-Dec-19 | Leandro Eusebio Mascarenhas                | Pedro Sebastiao Teofilo Mascarent  |
| MONTEIRO    | 15-Dec-19 | 5-Jan-20  | Maria Joaquina Irena Sebastiana Monteiro   | Constancio Piedade Remigio Monte   |
| MASCARENHAS | 26-Mar-20 | 3-Apr-20  | Constancio Salvador das Dores Mascarenhas  | Marcos Francisco Aleixo Braz Masc  |
| MONTEIRO    | 19-Jun-20 | 26-Jun-20 | Antonio da Conceicao Gracias Monteiro      | Cesar Baronio da Conceicao Monte   |
| ARAUJO      | 12-Jul-20 | 26-Aug-20 | Maria Alice Helena D'Araujo                | Joao Caetano Sebastiao Eduardo /   |
| MONTEIRO    | 12-Jan-22 | 18-Jan-22 | Alfredo Inocencio Gracias Monteiro         | Cesar Baronio da Conceicao Monte   |
| VALADARES   | 26-Jan-22 | 26-Mar-22 | Visitacao Mercês Teresa Valadares          | Roque Mariano Lourenco Valadare    |
| MASCARENHAS | 21-Mar-22 | 28-Mar-22 | Placido Milagres Thome Mascarenhas         | Pedro Sebastiao Teofilo Mascarent  |
| MONTEIRO    | 17-Jun-22 | 25-Jun-22 | Analinda Fernandina Monteiro               | Constancio Piedade Remigio Monte   |
| MASCARENHAS | 21-Oct-22 | 28-Oct-22 | Narciso Sebastiao Mascarenhas              | Miguel Joao Mascarenhas            |
| ARAUJO      | 29-Nov-22 | 6-Dec-22  | Constantino Roque Miguel Araujo            | Milagres Santana Gaudino Araujo    |
| MONTEIRO    | 17-Apr-23 | 24-Apr-23 | Henriqueta Quiteria Divina Monteiro        | Rosario Mariano Alleluia Monteiro  |
| MONTEIRO    | 19-Jun-23 | 24-Jun-23 | Maria Luciana Gracias Monteiro             | Cesar Baronio da Conceicao Monte   |
| VALADARES   | 30-Jun-23 | 7-Jul-23  | Manuel Antonio Nicolau Valadares           | Roque Mariano Lourenco Valadare    |

|             |           |           |                                             |                                      |
|-------------|-----------|-----------|---------------------------------------------|--------------------------------------|
| MONTEIRO    | 8-Jul-23  | 18-Jul-23 | Jose Lino de Bossuet Monteiro               | Joaq Cosme Damiao Bossuet Mont       |
| MASCARENHAS | 26-Jul-23 | 24-Aug-23 | Camilo Santana Ataide Mascarenhas           | Constancio Mascarenhas               |
| ARAUJO      | 8-Dec-23  | 15-Dec-23 | Remedios Gondicalo Conceicao Araujo         | Milagres Santana Gaudino Araujo      |
| MONTEIRO    | 8-Mar-24  | 15-Mar-24 | Inacio Bernadito Joao de Deus Monteiro      | Joao Micael Nascimento Monteiro      |
| MASCARENHAS | 21-May-24 | 28-May-24 | Maria Lina Rita Mascarenhas                 | Salvador do Rosario Erasmo Masc      |
| MONTEIRO    | 31-Jan-25 | 9-Feb-25  | Carlos Constancio Jesus Monteiro            | Jose Sebastiao da Piedade Monteir    |
| ARAUJO      | 31-Jan-21 | 4-Mar-25  | Maria Emilia Filomena D'Araujo              | Joao Caetano Sebastiao Eduardo /     |
| ARAUJO      | 2-Feb-25  | 4-Mar-25  | Luis Joao Gonzaga D'Araujo                  | Joao Caetano Sebastiao Eduardo /     |
| MONTEIRO    | 12-Apr-25 | 19-Apr-25 | Maria Margarida Gracias Monteiro            | Cesar Baronio da Conceicao Monte     |
| MASCARENHAS | 27-Apr-25 | 4-May-25  | Tertuliano Wenceslau Salvador Mascarenhas   | Pedro Sebastiao Teofilo Mascarent    |
| MONTEIRO    | 24-Apr-25 | 5-May-25  | Malito de Bossuet Monteiro                  | Joao Cosme Damiao Bossuet Mont       |
| VALADARES   | 23-Jun-25 | 30-Jun-25 | Ana Severina Valadares                      | Roque Mariano Lourenco Valadare      |
| ARAUJO      | 30-Jun-25 | 7-Jul-25  | Paulo Manuel Joaquim Araujo                 | Joaquim Mariano Hilario dos Milagr   |
| ARAUJO      | 21-Dec-25 | 28-Dec-25 | Miguel Salvador dos Milagres Araujo         | Milagres Santana Gaudino Araujo      |
| MASCARENHAS | 23-Apr-26 | 30-Apr-26 | Georgina Leticia Noronha Mascarenhas        | Joao Crisostomo Santana Mascare      |
| ARAUJO      | 14-Jun-26 | 10-Aug-26 | Antonio Sebastiao Filipe Vilson de Araujo   | Joaquim Mariano de Araujo            |
| MONTEIRO    | 3-Sep-26  | 9-Sep-26  | Maria Doroteia Gracias Monteiro             | Cesar Baronio da Conceicao Monte     |
| MONTEIRO    | 5-Nov-26  | 14-Nov-26 | Jose Alberto Assiz Antonio Monteiro         | Flaviano Policarpo Aleluia Antonio I |
| ARAUJO      | 6-Nov-26  | 18-Nov-26 | Maria Emilia Araujo                         | Joao Caetano Sebastiao Eduardo /     |
| MASCARENHAS | 30-May-26 | 22-Nov-26 | Maria Leticia Quadros e Mascarenhas         | Constancio Roque Mascarenhas         |
| MASCARENHAS | 17-Nov-26 | 29-Nov-26 | Angela Clementina Mascarenhas               | Espirito Santo Antonio Francisco M   |
| MASCARENHAS | 5-Jul-27  | 17-Jul-27 | Sebastiao Constancio Antonio Mascarenhas    | Antonio Vicente Caetano Mascaren     |
| ARAUJO      | 28-Jul-27 | 4-Aug-27  | Narciso de Rosario Araujo                   | Caetano Piedade Floriano Araujo      |
| MASCARENHAS | 9-Jan-28  | 16-Jan-28 | Aires Sebastiao Orlando Mascarenhas         | Pedro Sebastiao Teofilo Mascarent    |
| MONTEIRO    | 18-Jan-28 | 25-Jan-28 | Jovita Pedro Joao Jose Monteiro             | Joao Micael Nascimento Monteiro      |
| MASCARENHAS | 1-Apr-28  | 9-Apr-28  | Lourdes Honorata Noronha Mascarenhas        | Joao Crisostomo Santana Mascare      |
| MONTEIRO    | 20-May-28 | 27-May-28 | Constancio Mariano Monteiro                 | Santana Manuel do Rosario Monteir    |
| ARAUJO      | 2-Apr-28  | 3-Jun-28  | Constancio Roque Francisco Araujo           | Milagres Santana Gaudino Araujo      |
| MONTEIRO    | 28-Jun-28 | 28-Jun-28 | Imelda Da Piedade Gracias Monteiro          | Cesar Baronio da Conceicao Monte     |
| MONTEIRO    | 29-Jun-28 | 6-Oct-28  | Dulcina Monteiro                            | Roque Sebastiao Adriano Monteiro     |
| MASCARENHAS | 19-Apr-29 | 26-Apr-29 | Maria Ofelia Olga Mascarenhas               | Salvador do Rosario Erasmo Masc      |
| MONTEIRO    | 15-Jul-29 | 22-Jul-29 | Henriques Jose Antonio Monteiro             | Flaviano Policarpo Aleluia Antonio I |
| MASCARENHAS | 7-Aug-29  | 8-Sep-29  | Teresinha Lina Mascarenhas                  | Pedro Sebastiao Teofilo Mascarent    |
| MONTEIRO    | 23-Sep-29 | 26-Sep-29 | <i>Pe. Jose Lino Gracias Monteiro</i>       | Cesar Baronio da Conceicao Monte     |
| MONTEIRO    | 12-Apr-30 | 25-Apr-30 | Maria Lila Filomena Teresinha Monteiro      | Joao Cosme Damiao Bossuet Mont       |
| MONTEIRO    | 28-Apr-30 | 5-May-30  | Jose Feliciano Monteiro                     | Roque Sebastiao Adriano Monteiro     |
| ARAUJO      | 12-May-30 | 17-May-30 | Antonio Hipolito Araujo                     | Caetano Piedade Floriano Araujo      |
| MONTEIRO    | 30-Aug-30 | 8-Sep-30  | Maria Especiosa Rosa Monteiro               | Sebastiao Manuel dos Remedios M      |
| VALADARES   | 22-Aug-30 | 1-Dec-30  | Elsa Maria Amelia Assuncao Valadares        | Vicente Valadares                    |
| ARAUJO      | 17-Jan-31 | 5-Feb-31  | Rui Antonio Craveiro Araujo                 | Joaquim Bernardo Lourenco Araujo     |
| MONTEIRO    | 3-Oct-31  | 6-Oct-31  | Teresa de Menino Jesus Gracias Monteiro     | Cesar Baronio da Conceicao Monte     |
| MONTEIRO    | 21-Nov-31 | 6-Dec-31  | Maria Ermelinda Berta Monteiro              | Sebastiao Manuel dos Remedios M      |
| MONTEIRO    | 31-Dec-31 | 7-Jan-32  | Maria Francisca Carolina Ofelia Monteiro    | Joao Micael Nascimento Monteiro      |
| ARAUJO      | 19-Jan-32 | 2-Feb-32  | Maria Quiteria Joana Araujo                 | Milagres Santana Gaudino Araujo      |
| ARAUJO      | 5-Nov-32  | 12-Nov-32 | Maria Luisa Quiteria Etelvina Teresa Araujo | Joaquim Sebastiao Aleixo Piedade     |
| MONTEIRO    | 23-Dec-32 | 5-Jan-33  | Joaquim Victor Isidoro Monteiro             | Filipe Salvador Nascimento Aleluia   |
| ARAUJO      | 13-Jan-33 | 20-Jan-33 | Clifton Sebastiao Felix Araujo              | Joaquim Bernardo Lourenco Araujo     |
| MASCARENHAS | 8-Mar-33  | 15-Mar-33 | Maria Ida Teresa Socorro Mascarenhas        | Espirito Santo Antonio Francisco M   |
| DE SA       | 16-May-33 | 20-Jun-33 | Jose Ubaldo Antonio Matias de Sa            | Jose Torcato de Sa                   |
| VALADARES   | 17-Jun-33 | 9-Sep-33  | Francisco Xavier Valadares                  | Vicente Valadares                    |
| MONTEIRO    | 5-Sep-33  | 12-Sep-33 | Maria Jose Augustilia dos Remedios Monteiro | Sebastiao Manuel dos Remedios M      |
| MASCARENHAS | 13-Mar-34 | 20-Mar-34 | Aires Jose Caetano Mascarenhas              | Pedro Sebastiao Teofilo Mascarent    |
| DE SA       | 6-Jun-34  | 13-Jun-34 | Jose Luis Jeronimo de Sa                    | Jose Torcato de Sa                   |
| MASCARENHAS | 29-Jan-35 | 5-Feb-35  | Teresinha Socorro Mascarenhas               | Espirito Santo Antonio Francisco M   |

|           |           |           |                                         |                                    |
|-----------|-----------|-----------|-----------------------------------------|------------------------------------|
| DE SA     | 8-Jul-36  | 15-Jul-36 | Jose Carmo Sebastiao da Piedade de Sa   | Jose Torcato de Sa                 |
| VALADARES | 15-Aug-36 | 30-Aug-36 | Joaquim Mariano Assumcao Valadares      | Abailardo Agostinho Espirito Santo |
| VALADARES | 19-Apr-36 | 28-Jan-37 | Alice de Santa Filomena Valadares       | Vicente Valadares                  |
| MONTEIRO  | 18-Dec-44 | 10-Feb-45 | Filomena Lourdes de Edna Monteiro       | Nicolau Emilio Monteiro            |
| ARAUJO    | 17-Feb-46 | 24-Feb-46 | Maria Jacinta Fatima Alexandrina Araujo | Joao Sebastiao Expectacao de Jes   |
| MONTEIRO  | 3-Sep-46  | 29-Sep-46 | Joaquim Jose Heliodoro Monteiro         | Sedonio Pais Monteiro              |
| MONTEIRO  | 4-Dec-46  | 22-Dec-46 | Amilcar Carlos Jose Manuel Monteiro     | Julio Cesar Francisco Monteiro     |
| ARAUJO    | 7-Mar-47  | 15-Apr-47 | Maria Aura Angela Olivia Araujo         | Bernardo Justino Araujo            |
| ARAUJO    | 7-Jun-47  | 14-Jun-47 | Joaquim Hilario Antonio Milagres Araujo | Joao Sebastiao Expectacao de Jes   |
| MONTEIRO  | 22-Aug-47 | 3-Sep-47  | Maria Eliza Yvette Monteiro             | Sedonio Pais Monteiro              |
| MONTEIRO  | 20-Sep-47 | 29-Sep-47 | Margarida Priti Cordeiro Monteiro       | Francisco Agostinho Gracias Monte  |
| ARAUJO    | 13-Feb-48 | 22-Feb-48 | Caetano Agnelo dos Milagres Araujo      | Carlos Antonio Francisco dos Milag |
| MONTEIRO  | 30-Apr-48 | 16-May-48 | Maria do Ceu Elvira Monteiro            | Julio Cesar Francisco Monteiro     |
| MONTEIRO  | 19-Aug-48 | 18-Sep-48 | Pulqueria Odete Vijaia Monteiro         | Nicolau Eduardo Monteiro           |
| MONTEIRO  | 9-Nov-48  | 20-Nov-48 | Fernando Dias Monteiro                  | Jose do Carmo Humberto Monteiro    |
| ARAUJO    | 26-Apr-49 | 3-May-49  | Maria Florinda Clea Araujo              | Joao Sebastiao Expectacao de Jes   |
| MONTEIRO  | 23-Jun-49 | 3-Jul-49  | Maria do Carmo Propercia Monteiro       | Julio Cesar Francisco Monteiro     |
| MONTEIRO  | 14-Jul-49 | 24-Jul-49 | Boaventura das Mercês Monteiro          | Joao Baptista das Mercês Monteiro  |
| MONTEIRO  | 5-Sep-49  | 17-Sep-49 | Oscar Joel Monteiro                     | Sedonio Pais Monteiro              |
| ARAUJO    | 16-May-50 | 27-May-50 | Manuel Eduardo Olavo D'Araujo           | Exaltacao Nicolau Mariano D'Arauj  |

Table S6. Electoral rolls for (convert) KAMAT and PAI lineages in Kudtari and Lotli towns (2013)

**KUDTARI:**

| Vangor | Original | Current   | Number |
|--------|----------|-----------|--------|
| 1      | KAMAT    | MENEZES   | 173    |
| 1      | KAMAT    | BORGES    | 44     |
| 3      | KAMAT    | VAS       | 198    |
| 5      | KAMAT    | DINIZ     | 34     |
| 8      | KAMAT    | PIMENTA   | 17     |
| 9      | KAMAT    | ESTIBEIRO | 54     |
| 12     | KAMAT    | BARRETO   | 155    |
| 14     | KAMAT    | VEIGA     | 18     |
| 15     | KAMAT    | PAES      | 79     |
| 16     | KAMAT    | VIEGAS    | 32     |

Total electorate: 9475

**LOTLI:**

| Vangor | Original | Current     | Number |
|--------|----------|-------------|--------|
| 2      | PAI      | DA COSTA    | 2      |
| 5      | PAI      | VALADARES   | 0      |
| 7      | PAI      | DE SA       | 0      |
| 8      | PAI      | MASCARENHAS | 50     |
| 10     | PAI      | COLACO      | 0      |
| 12     | PAI      | ARAUJO      | 46     |
| 15     | PAI      | MONTEIRO    | 54     |

Total electorate: 4587

Source: <http://ceogoa.nic.in>  
(downloaded 10/1/2013)

Table S7. **TMRCA branch-point histogram table.** Pairwise TMRCA computations were performed as described in Methods. Each pairwise value was computed using the modal reference of vangor 8 (Table 1) against each R1a1 member of the communities listed. The TMRCA were grouped at 600 year intervals between 1500 BCE and 1500 CE. Results are expressed as the percentage of the total sample for each time period.

|                      | <b>GSB-K</b> | <b>Khatri</b> | <b>Zabuli</b> | <b>Pashtun</b> | <b>Gandhara</b> | <b>Gulf</b> | <b>S. Asia</b> | <b>Bactria</b> | <b>Tajik</b> | <b>Saraswat</b> |
|----------------------|--------------|---------------|---------------|----------------|-----------------|-------------|----------------|----------------|--------------|-----------------|
| <b>n</b>             | <b>9</b>     | <b>7</b>      | <b>23</b>     | <b>15</b>      | <b>29</b>       | <b>42</b>   | <b>19</b>      | <b>12</b>      | <b>11</b>    | <b>13</b>       |
| <b>&lt;1500 BCE</b>  | <i>0.0</i>   | <i>0.0</i>    | <i>13.0</i>   | <b>20.0</b>    | <b>20.7</b>     | <i>14.3</i> | <b>26.3</b>    | <i>0.0</i>     | <b>36.4</b>  | <b>53.8</b>     |
| <b>1000-1500 BCE</b> | <i>0.0</i>   | <i>0.0</i>    | <i>13.0</i>   | <b>33.3</b>    | <i>13.8</i>     | <b>31.0</b> | <b>26.3</b>    | <b>50.0</b>    | <b>54.5</b>  | <b>23.1</b>     |
| <b>1000-900 BCE</b>  | <i>0.0</i>   | <b>28.6</b>   | <b>47.8</b>   | <b>26.7</b>    | <b>62.1</b>     | <b>52.4</b> | <b>42.1</b>    | <b>50.0</b>    | <i>9.1</i>   | <i>7.7</i>      |
| <b>1000BCE-300CE</b> | <i>0.0</i>   | <b>28.6</b>   | <b>26.1</b>   | <b>20.0</b>    | <i>3.4</i>      | <i>2.4</i>  | <i>5.3</i>     | <i>0.0</i>     | <i>0.0</i>   | <i>7.7</i>      |
| <b>1000-900 CE</b>   | <b>33.3</b>  | <b>42.9</b>   | <i>0.0</i>    | <i>0.0</i>     | <i>0.0</i>      | <i>0.0</i>  | <i>0.0</i>     | <i>0.0</i>     | <i>0.0</i>   | <i>7.7</i>      |
| <b>1000-1500 CE</b>  | <b>33.3</b>  | <i>0.0</i>    | <i>0.0</i>    | <i>0.0</i>     | <i>0.0</i>      | <i>0.0</i>  | <i>0.0</i>     | <i>0.0</i>     | <i>0.0</i>   | <i>0.0</i>      |
| <b>500-present</b>   | <b>33.3</b>  | <i>0.0</i>    | <i>0.0</i>    | <i>0.0</i>     | <i>0.0</i>      | <i>0.0</i>  | <i>0.0</i>     | <i>0.0</i>     | <i>0.0</i>   | <i>0.0</i>      |

**Key:** Pre-Vedic (<1500 BCE); Vedic (1500-900 BCE); Classical (900-300 BCE); Early Historical (300 BCE-300 CE); Brahmin Migration (300-900 CE); Late Medieval (900-1500 CE); Western Colonial (>1500 BCE).

Table S8. **657A incidence table.** R1a1 individuals from each cohort were examined for 657A type (R1a1 Y-HG individuals carrying the STR profile: DYS456<16, DYS458>15, GATAH4>12).

|    | Group or Region      | ID  | Regions / Communities                     | Reference | R1a1 (n) | L657 | Pct 657A    |
|----|----------------------|-----|-------------------------------------------|-----------|----------|------|-------------|
| 1  | LPK                  | GSB | GSB, Goa (India)                          | This work | 9        | Yes  | <b>66.7</b> |
| 2  | Khatri               | KHT | Punjab (India)                            | This work | 7        | Yes  | <b>57.1</b> |
| 3  | Zabulistan/Arachosia | ZAB | Helmand, Ghazni, Afghanistan              | ref 1     | 29       | n.a. | <b>31.0</b> |
| 4  | Pashtun              | PST | Afghanistan                               | ref 2     | 25       | n.a. | <b>8.0</b>  |
| 5  | Gandhara             | GDH | Khyber Pass Region, Afghanistan           | ref 1     | 30       | n.a. | <b>10.0</b> |
| 6  | Balkh/Bactria        | BCT | Kunduz, Mazar e Sharif, Afghanistan       | ref 1     | 12       | n.a. | <b>41.7</b> |
| 7  | Gulf States          | GLF | Saudi Arabia, Kuwait, Bahrain, Qatar, UAE | Public db | 40       | Yes  | <b>2.5</b>  |
| 8  | Sub-continent        | SCT | Pakistan, India (except Konkan)           | Public db | 22       | Yes  | <b>0.0</b>  |
| 9  | Saraswat Brahmins    | PSB | India (Punjab, HP)                        | Ref 3     | 45       | Yes  | n/a         |
| 10 | Tajik                | TJK | Afghanistan                               | ref 2     | 17       | n.a. | <b>17.6</b> |
| 11 | West Transcaucasia   | WTC | Abkhaz, Circassian, Shapsug               | ref 4     | 27       | n.a. | <b>0.0</b>  |
| 12 | Nakh group           | NKH | Chechen, Ingush                           | ref 4     | 18       | n.a. | <b>0.0</b>  |
| 13 | East Transcaucasia   | ETC | Avar, Dargins, Lezghins                   | ref 4     | 27       | n.a. | <b>55.6</b> |

#### References:

1. Lacau H, Bukhari A, Gayden T, La Salvia J, Regueiro M, Stojkovic O, Herrera RJ. (2011) Y-STR profiling in two Afghanistan populations. *Legal Med (Tokyo)*. 13(2):103-108.
2. Lacau H, Gayden T, Regueiro M, Chennakrishnaiah S, Bukhari A, Underhill PA, Garcia-Bertrand RL, Herrera RJ. (2012) Afghanistan from a Y-chromosome perspective. *Eur J Hum Genet*. 20(10): 1063-1070.
3. Yadav B, Raina A, Dogra TD. (2011) Haplotype diversity of 17 Y-chromosomal STRs in Saraswat Brahmin Community of North India. *Forensic Sci Int Genet*. 5(3): e63-70.
4. Balanovsky O, Dibirova K, Dybo A, Mudrak O, Frolova S, Pocheshkhova E, Haber M, Platt D, Schurr T, Haak W, Kuznetsova M, Radzhabov M, Balaganskaya O, Romanov A, Zakharova T, Soria Hernanz DF, Zalloua P, Koshel S, Ruhlen M, Renfrew C, Wells RS, Tyler-Smith C, Balanovska E; Genographic Consortium. (2011) Parallel evolution of genes and languages in the Caucasus region. *Mol Biol Evol*. 28(10): 2905-2920.

Table S9. **R1a1 subclades by geographic region.** Percent geographic incidence of each major R1a1 clade in the public database (October 2012); TC=Transcaucasia. To avoid contribution bias, the relative percentage for each class is shown.

| GION        | <i>R1a1 subclade (n)</i> |                   |                       |                       |                        |
|-------------|--------------------------|-------------------|-----------------------|-----------------------|------------------------|
|             | <b>M458 (133)</b>        | <b>Z280 (185)</b> | <b>Z93 L657- (57)</b> | <b>Z93+L657+ (27)</b> | <b>All R1a1 (2417)</b> |
| DITERRANEAN | 0.8                      | 2.7               | 5.3                   | 0.0                   | 1.7                    |
| ATOLIA-TC   | 0.8                      | 2.2               | 24.6                  | 0.0                   | 1.2                    |
| RSIAN GULF  | 0.0                      | 0.5               | 19.3                  | 59.3                  | 3.6                    |
| ASIA        | 0.0                      | 0.0               | 5.3                   | 37.0                  | 1.2                    |
| .KAN-BALTIC | 78.2                     | 50.8              | 10.5                  | 0.0                   | 42.0                   |
| STEPPE      | 19.5                     | 38.9              | 17.5                  | 3.7                   | 22.1                   |
| EUROPE      | 0.8                      | 4.9               | 17.5                  | 0.0                   | 28.3                   |

Table S10. Centroid data table

| DB ID#  | Country      | HG    | Clade      | LAT  | LONG |
|---------|--------------|-------|------------|------|------|
| 194691  | Afghanistan  | J2a4* | J-L26 M67- | 34.5 | 69.2 |
| 217812  | Armenia      | J2a4* | J-L26 M67- | 40.2 | 44.5 |
| 166329  | Armenia      | J2a4* | J-L26 M67- | 40.2 | 44.5 |
| 181393  | Armenia      | J2a4* | J-L26 M67- | 40.2 | 44.5 |
| E4955   | Austria      | J2a4* | J-L26 M67- | 48.2 | 16.4 |
| N96517  | Austria      | J2a4* | J-L26 M67- | 48.2 | 16.4 |
| N74818  | Belgium      | J2a4* | J-L26 M67- | 50.8 | 4.4  |
| N5341   | Bulgaria     | J2a4* | J-L26 M67- | 42.7 | 23.3 |
| 105169  | Finland      | J2a4* | J-L26 M67- | 60.2 | 24.9 |
| 41120   | France       | J2a4* | J-L26 M67- | 48.9 | 2.4  |
| 122074  | France       | J2a4* | J-L26 M67- | 48.9 | 2.4  |
| N6276   | France       | J2a4* | J-L26 M67- | 48.9 | 2.4  |
| 44036   | Germany      | J2a4* | J-L26 M67- | 52.5 | 13.4 |
| 103233  | Germany      | J2a4* | J-L26 M67- | 52.5 | 13.4 |
| 71974   | India        | J2a4* | J-L26 M67- | 21   | 78   |
| N3437   | India        | J2a4* | J-L26 M67- | 21   | 78   |
| N84214  | India        | J2a4* | J-L26 M67- | 21   | 78   |
| E12430  | Iran         | J2a4* | J-L26 M67- | 35.7 | 51.4 |
| N68809  | Iran         | J2a4* | J-L26 M67- | 35.7 | 51.4 |
| 237306  | Ireland      | J2a4* | J-L26 M67- | 53.3 | 6.3  |
| 182443  | Ireland      | J2a4* | J-L26 M67- | 53.3 | 6.3  |
| 169514  | Italy        | J2a4* | J-L26 M67- | 41.9 | 12.5 |
| 205145  | Italy        | J2a4* | J-L26 M67- | 41.9 | 12.5 |
| 182122  | Italy        | J2a4* | J-L26 M67- | 41.9 | 12.5 |
| N100355 | Kuwait       | J2a4* | J-L26 M67- | 29.4 | 47.9 |
| 168722  | Levant       | J2a4* | J-L26 M67- | 33.4 | 35.5 |
| 204156  | Levant       | J2a4* | J-L26 M67- | 33.4 | 35.5 |
| N74325  | Levant       | J2a4* | J-L26 M67- | 33.4 | 35.5 |
| 180589  | Levant       | J2a4* | J-L26 M67- | 33.4 | 35.5 |
| 186929  | Levant       | J2a4* | J-L26 M67- | 33.4 | 35.5 |
| 212279  | Levant       | J2a4* | J-L26 M67- | 33.4 | 35.5 |
| E9560   | Levant       | J2a4* | J-L26 M67- | 33.4 | 35.5 |
| 109098  | Poland       | J2a4* | J-L26 M67- | 52.2 | 21   |
| 115615  | Qatar        | J2a4* | J-L26 M67- | 25.3 | 51.5 |
| 207796  | Saudi Arabia | J2a4* | J-L26 M67- | 24.6 | 46.7 |
| 149554  | Saudi Arabia | J2a4* | J-L26 M67- | 24.6 | 46.7 |
| M7436   | Saudi Arabia | J2a4* | J-L26 M67- | 24.6 | 46.7 |
| 182069  | Spain        | J2a4* | J-L26 M67- | 40.4 | -3.7 |
| 139704  | Turkey       | J2a4* | J-L26 M67- | 39.9 | 32.9 |
| 160878  | Turkey       | J2a4* | J-L26 M67- | 39.9 | 32.9 |
| 184386  | Turkey       | J2a4* | J-L26 M67- | 39.9 | 32.9 |
| 216103  | France       | J2a4* | J-L26 M67- | 48.9 | 2.4  |
| 202853  | Portugal     | J2a4* | J-L26 M67- | 38.8 | -9.1 |
| 229980  | Qatar        | J2a4* | J-L26 M67- | 25.3 | 51.5 |
| M7239   | Qatar        | J2a4* | J-L26 M67- | 25.3 | 51.5 |
| 216669  | Qatar        | J2a4* | J-L26 M67- | 25.3 | 51.5 |
| M7808   | Saudi Arabia | J2a4* | J-L26 M67- | 24.6 | 46.7 |
| E7054   | Slovenia     | J2a4* | J-L26 M67- | 46.1 | 14.5 |
| 112392  | UK           | J2a4* | J-L26 M67- | 51.5 | 0.1  |
| 205250  | UAE          | J2a4* | J-L26 M67- | 24.5 | 54.4 |



|        |               |       |            |      |      |
|--------|---------------|-------|------------|------|------|
| N37321 | UK            | J2a4* | J-L26 M67- | 51.5 | 0.1  |
| M6992  | Algeria       | J2a4a | J-M47      | 36.7 | 3.2  |
| 101499 | Armenia       | J2a4a | J-M47      | 40.2 | 44.5 |
| M6329  | Iran          | J2a4a | J-M47      | 35.7 | 51.4 |
| M6737  | Iran          | J2a4a | J-M47      | 35.7 | 51.4 |
| 96761  | Italy         | J2a4a | J-M47      | 41.9 | 12.5 |
| 161273 | Kuwait        | J2a4a | J-M47      | 29.4 | 47.9 |
| 191840 | Kuwait        | J2a4a | J-M47      | 29.4 | 47.9 |
| 229690 | Kuwait        | J2a4a | J-M47      | 29.4 | 47.9 |
| M6426  | Kuwait        | J2a4a | J-M47      | 29.4 | 47.9 |
| M7429  | Kuwait        | J2a4a | J-M47      | 29.4 | 47.9 |
| 193791 | Levant        | J2a4a | J-M47      | 33.4 | 35.5 |
| 79848  | Luxembourg    | J2a4a | J-M47      | 49.6 | 6.1  |
| 236171 | Qatar         | J2a4a | J-M47      | 25.3 | 51.5 |
| M6715  | Qatar         | J2a4a | J-M47      | 25.3 | 51.5 |
| 149703 | Saudi Arabia  | J2a4a | J-M47      | 24.6 | 46.7 |
| 165654 | Saudi Arabia  | J2a4a | J-M47      | 24.6 | 46.7 |
| 169860 | Saudi Arabia  | J2a4a | J-M47      | 24.6 | 46.7 |
| 169882 | Saudi Arabia  | J2a4a | J-M47      | 24.6 | 46.7 |
| 198885 | Saudi Arabia  | J2a4a | J-M47      | 24.6 | 46.7 |
| 232941 | Saudi Arabia  | J2a4a | J-M47      | 24.6 | 46.7 |
| 233703 | Saudi Arabia  | J2a4a | J-M47      | 24.6 | 46.7 |
| 234783 | Saudi Arabia  | J2a4a | J-M47      | 24.6 | 46.7 |
| M6642  | Saudi Arabia  | J2a4a | J-M47      | 24.6 | 46.7 |
| M7065  | Saudi Arabia  | J2a4a | J-M47      | 24.6 | 46.7 |
| M7380  | Saudi Arabia? | J2a4a | J-M47      | 24.6 | 46.7 |
| M3626  | UAE           | J2a4a | J-M47      | 24.5 | 54.4 |
| M3701  | UAE           | J2a4a | J-M47      | 24.5 | 54.4 |
| M4272  | UAE           | J2a4a | J-M47      | 24.5 | 54.4 |
| M6903  | UAE           | J2a4a | J-M47      | 24.5 | 54.4 |
| N57035 | UK            | J2a4a | J-M47      | 51.5 | 0.1  |
| 174248 | Armenia       | J2a4b | J-M67      | 40.2 | 44.5 |
| 174250 | Armenia       | J2a4b | J-M67      | 40.2 | 44.5 |
| N64462 | Armenia       | J2a4b | J-M67      | 40.2 | 44.5 |
| 230305 | Chechnya      | J2a4b | J-M67      | 43.3 | 45.6 |
| 216529 | Georgia       | J2a4b | J-M67      | 41.7 | 44.8 |
| 31852  | Germany       | J2a4b | J-M67      | 52.5 | 13.4 |
| 36603  | Germany       | J2a4b | J-M67      | 52.5 | 13.4 |
| 29156  | Hungary       | J2a4b | J-M67      | 47.4 | 19.2 |
| N11949 | Iran          | J2a4b | J-M67      | 35.7 | 51.4 |
| N30461 | Iran          | J2a4b | J-M67      | 35.7 | 51.4 |
| 70513  | Iraq          | J2a4b | J-M67      | 33.3 | 44.4 |
| 31879  | Ireland       | J2a4b | J-M67      | 53.3 | 6.3  |
| 57210  | Ireland       | J2a4b | J-M67      | 53.3 | 6.3  |
| 144646 | Ireland       | J2a4b | J-M67      | 53.3 | 6.3  |
| N53046 | Ireland       | J2a4b | J-M67      | 53.3 | 6.3  |
| 18790  | Italy         | J2a4b | J-M67      | 41.9 | 12.5 |
| 72837  | Italy         | J2a4b | J-M67      | 41.9 | 12.5 |
| 86636  | Italy         | J2a4b | J-M67      | 41.9 | 12.5 |
| 96663  | Italy         | J2a4b | J-M67      | 41.9 | 12.5 |
| E1878  | Italy         | J2a4b | J-M67      | 41.9 | 12.5 |
| N16888 | Italy         | J2a4b | J-M67      | 41.9 | 12.5 |
| N60728 | Italy         | J2a4b | J-M67      | 41.9 | 12.5 |
| N68160 | Italy         | J2a4b | J-M67      | 41.9 | 12.5 |

|        |             |        |       |      |      |
|--------|-------------|--------|-------|------|------|
| N70674 | Italy       | J2a4b  | J-M67 | 41.9 | 12.5 |
| N89155 | Italy       | J2a4b  | J-M67 | 41.9 | 12.5 |
| 149533 | Levant      | J2a4b  | J-M67 | 33.4 | 35.5 |
| 152050 | Levant      | J2a4b  | J-M67 | 33.4 | 35.5 |
| 176688 | Levant      | J2a4b  | J-M67 | 33.4 | 35.5 |
| N22510 | Levant      | J2a4b  | J-M67 | 33.4 | 35.5 |
| 103307 | Netherlands | J2a4b  | J-M67 | 52.4 | 4.9  |
| 21636  | Poland      | J2a4b  | J-M67 | 52.2 | 21   |
| 70515  | Poland      | J2a4b  | J-M67 | 52.2 | 21   |
| 129384 | Portugal    | J2a4b  | J-M67 | 38.8 | -9.1 |
| 75164  | Romania     | J2a4b  | J-M67 | 44.4 | 26.1 |
| 230560 | Russia      | J2a4b  | J-M67 | 55.7 | 37.6 |
| 198821 | Syria       | J2a4b  | J-M67 | 33.5 | 36.3 |
| 164196 | Turkey      | J2a4b  | J-M67 | 39.9 | 32.9 |
| 169448 | Turkey      | J2a4b  | J-M67 | 39.9 | 32.9 |
| N15937 | Turkey      | J2a4b  | J-M67 | 39.9 | 32.9 |
| N59703 | Turkey      | J2a4b  | J-M67 | 39.9 | 32.9 |
| 96049  | UK          | J2a4b  | J-M67 | 51.5 | 0.1  |
| 123323 | UK          | J2a4b  | J-M67 | 51.5 | 0.1  |
| 71893  | Ukraine     | J2a4b  | J-M67 | 50.4 | 30.5 |
| 149200 | Armenia     | J2a4b1 | J-M92 | 40.2 | 44.5 |
| 207705 | Armenia     | J2a4b1 | J-M92 | 40.2 | 44.5 |
| N12720 | Azerbaijan  | J2a4b1 | J-M92 | 40.4 | 49.8 |
| 69509  | Belarus     | J2a4b1 | J-M92 | 53.9 | 27.6 |
| 147048 | Germany     | J2a4b1 | J-M92 | 52.5 | 13.4 |
| N11704 | Germany     | J2a4b1 | J-M92 | 52.5 | 13.4 |
| 200837 | Germany     | J2a4b1 | J-M92 | 52.5 | 13.4 |
| 120539 | Germany     | J2a4b1 | J-M92 | 52.5 | 13.4 |
| 28730  | Germany     | J2a4b1 | J-M92 | 52.5 | 13.4 |
| 70140  | Germany     | J2a4b1 | J-M92 | 52.5 | 13.4 |
| 147721 | Germany     | J2a4b1 | J-M92 | 52.5 | 13.4 |
| 45403  | Hungary     | J2a4b1 | J-M92 | 47.4 | 19.2 |
| 50911  | Hungary     | J2a4b1 | J-M92 | 47.4 | 19.2 |
| N93774 | Hungary     | J2a4b1 | J-M92 | 47.4 | 19.2 |
| 228035 | Hungary     | J2a4b1 | J-M92 | 47.4 | 19.2 |
| 118655 | Hungary     | J2a4b1 | J-M92 | 47.4 | 19.2 |
| 48340  | Iran        | J2a4b1 | J-M92 | 35.7 | 51.4 |
| 107714 | Italy       | J2a4b1 | J-M92 | 41.9 | 12.5 |
| 118717 | Italy       | J2a4b1 | J-M92 | 41.9 | 12.5 |
| 123370 | Italy       | J2a4b1 | J-M92 | 41.9 | 12.5 |
| E14637 | Italy       | J2a4b1 | J-M92 | 41.9 | 12.5 |
| 65112  | Italy       | J2a4b1 | J-M92 | 41.9 | 12.5 |
| 162181 | Italy       | J2a4b1 | J-M92 | 41.9 | 12.5 |
| 343    | Lithuania   | J2a4b1 | J-M92 | 54.7 | 25.3 |
| 164237 | Lithuania   | J2a4b1 | J-M92 | 54.7 | 25.3 |
| 132673 | Luxembourg  | J2a4b1 | J-M92 | 49.6 | 6.1  |
| 39654  | Netherlands | J2a4b1 | J-M92 | 52.4 | 4.9  |
| 43553  | Poland      | J2a4b1 | J-M92 | 52.2 | 21   |
| 100995 | Poland      | J2a4b1 | J-M92 | 52.2 | 21   |
| 108915 | Poland      | J2a4b1 | J-M92 | 52.2 | 21   |
| 209229 | Poland      | J2a4b1 | J-M92 | 52.2 | 21   |
| 52473  | Portugal    | J2a4b1 | J-M92 | 38.8 | -9.1 |
| 88790  | Portugal    | J2a4b1 | J-M92 | 38.8 | -9.1 |
| 76212  | Romania     | J2a4b1 | J-M92 | 44.4 | 26.1 |

|        |              |        |        |      |       |
|--------|--------------|--------|--------|------|-------|
| 145757 | Romania      | J2a4b1 | J-M92  | 44.4 | 26.1  |
| 174944 | Romania      | J2a4b1 | J-M92  | 44.4 | 26.1  |
| 171079 | Romania      | J2a4b1 | J-M92  | 44.4 | 26.1  |
| 112842 | Romania      | J2a4b1 | J-M92  | 44.4 | 26.1  |
| 174705 | Russia       | J2a4b1 | J-M92  | 55.7 | 37.6  |
| N15777 | Russia       | J2a4b1 | J-M92  | 55.7 | 37.6  |
| 157250 | Russia       | J2a4b1 | J-M92  | 55.7 | 37.6  |
| 112303 | Russia       | J2a4b1 | J-M92  | 55.7 | 37.6  |
| M7226  | Saudi Arabia | J2a4b1 | J-M92  | 24.6 | 46.7  |
| M5017  | Saudi Arabia | J2a4b1 | J-M92  | 24.6 | 46.7  |
| N93603 | Serbia       | J2a4b1 | J-M92  | 44.8 | 20.4  |
| 112883 | Spain        | J2a4b1 | J-M92  | 40.4 | -3.7  |
| N3597  | Spain        | J2a4b1 | J-M92  | 40.4 | -3.7  |
| 91003  | Spain        | J2a4b1 | J-M92  | 40.4 | -3.7  |
| 164217 | Turkey       | J2a4b1 | J-M92  | 39.9 | 32.9  |
| 166324 | Turkey       | J2a4b1 | J-M92  | 39.9 | 32.9  |
| N57415 | Turkey       | J2a4b1 | J-M92  | 39.9 | 32.9  |
| N75792 | Turkey       | J2a4b1 | J-M92  | 39.9 | 32.9  |
| N90067 | Turkey       | J2a4b1 | J-M92  | 39.9 | 32.9  |
| N19693 | UK           | J2a4b1 | J-M92  | 51.5 | 0.1   |
| 106553 | UK           | J2a4b1 | J-M92  | 51.5 | 0.1   |
| 163    | Ukraine      | J2a4b1 | J-M92  | 50.4 | 30.5  |
| 5984   | Ukraine      | J2a4b1 | J-M92  | 50.4 | 30.5  |
| 119606 | Ukraine      | J2a4b1 | J-M92  | 50.4 | 30.5  |
| 119546 | Ukraine      | J2a4b1 | J-M92  | 50.4 | 30.5  |
| N69190 | Ukraine      | J2a4b1 | J-M92  | 50.4 | 30.5  |
| 20447  | Belgium      | L1a    | L-M27+ | 50.8 | 4.4   |
| 46274  | Germany      | L1a    | L-M27+ | 52.5 | 13.4  |
| 131191 | Germany      | L1a    | L-M27+ | 52.5 | 13.4  |
| N76271 | India        | L1a    | L-M27+ | 21   | 78    |
| 69078  | India        | L1a    | L-M27+ | 21   | 78    |
| 89330  | India        | L1a    | L-M27+ | 21   | 78    |
| 102209 | India        | L1a    | L-M27+ | 21   | 78    |
| 133264 | India        | L1a    | L-M27+ | 21   | 78    |
| N13642 | India        | L1a    | L-M27+ | 21   | 78    |
| N15319 | India        | L1a    | L-M27+ | 21   | 78    |
| N3831  | India        | L1a    | L-M27+ | 21   | 78    |
| N39694 | India        | L1a    | L-M27+ | 21   | 78    |
| N43666 | India        | L1a    | L-M27+ | 21   | 78    |
| N74752 | India        | L1a    | L-M27+ | 21   | 78    |
| N82752 | India        | L1a    | L-M27+ | 21   | 78    |
| N98608 | India        | L1a    | L-M27+ | 21   | 78    |
| N9890  | India        | L1a    | L-M27+ | 21   | 78    |
| 76304  | India        | L1a    | L-M27+ | 21   | 78    |
| N10580 | India        | L1a    | L-M27+ | 21   | 78    |
| N88841 | India        | L1a    | L-M27+ | 21   | 78    |
| N92407 | Iran         | L1a    | L-M27+ | 35.7 | 51.4  |
| 190284 | Iraq         | L1a    | L-M27+ | 33.3 | 44.4  |
| E6065  | Italy        | L1a    | L-M27+ | 41.9 | 12.5  |
| 204204 | Kuwait       | L1a    | L-M27+ | 29.4 | 47.9  |
| M7213  | Kuwait       | L1a    | L-M27+ | 29.4 | 47.9  |
| N26601 | Levant       | L1a    | L-M27+ | 33.4 | 35.5  |
| M6412  | Levant       | L1a    | L-M27+ | 33.4 | 35.5  |
| 186143 | Malaysia     | L1a    | L-M27+ | 3.1  | 101.7 |

|         |              |       |                |      |      |
|---------|--------------|-------|----------------|------|------|
| N12495  | Pakistan     | L1a   | L-M27+         | 33.7 | 73.2 |
| N5937   | Pakistan     | L1a   | L-M27+         | 33.7 | 73.2 |
| N63576  | Pakistan     | L1a   | L-M27+         | 33.7 | 73.2 |
| 54993   | Saudi Arabia | L1a   | L-M27+         | 24.6 | 46.7 |
| 224572  | Saudi Arabia | L1a   | L-M27+         | 24.6 | 46.7 |
| 180230  | Spain        | L1a   | L-M27+         | 40.4 | -3.7 |
| 222595  | Syria        | L1a   | L-M27+         | 33.5 | 36.3 |
| M6704   | UAE          | L1a   | L-M27+         | 24.5 | 54.4 |
| M6396   | UAE          | L1a   | L-M27+         | 24.5 | 54.4 |
| 222106  | UAE          | L1a   | L-M27+         | 24.5 | 54.4 |
| M6852   | UAE          | L1a   | L-M27+         | 24.5 | 54.4 |
| 189917  | Armenia      | L1b*  | M295+ M317+    | 40.2 | 44.5 |
| 155684  | Armenia      | L1b*  | M295+ M317+    | 40.2 | 44.5 |
| 181374  | Bulgaria     | L1b*  | M295+ M317+    | 42.7 | 23.3 |
| 172987  | Georgia      | L1b*  | M295+ M317+    | 41.7 | 44.8 |
| N94640  | Greece       | L1b*  | M295+ M317+    | 37.9 | 23.7 |
| 95658   | Greece       | L1b*  | M295+ M317+    | 37.9 | 23.7 |
| N30297  | Greece       | L1b*  | M295+ M317+    | 37.9 | 23.7 |
| 36064   | Russia       | L1b*  | M295+ M317+    | 55.7 | 37.6 |
| N29672  | Russia       | L1b*  | M295+ M317+    | 55.7 | 37.6 |
| 155681  | Turkey       | L1b*  | M295+ M317+    | 39.9 | 32.9 |
| N93829  | Turkey       | L1b*  | M295+ M317+    | 39.9 | 32.9 |
| 208461  | Turkey       | L1b*  | M295+ M317+    | 39.9 | 32.9 |
| N25240  | Turkey       | L1b*  | M295+ M317+    | 39.9 | 32.9 |
| 183217  | Turkey       | L1b*  | M295+ M317+    | 39.9 | 32.9 |
| N105310 | Turkey       | L1b*  | M295+ M317+    | 39.9 | 32.9 |
| 97848   | Turkey       | L1b*  | M295+ M317+    | 39.9 | 32.9 |
| 166328  | Armenia      | L1b1* | L-L.656+ L349- | 40.2 | 44.5 |
| E10323  | Austria      | L1b1* | L-L.656+ L349- | 48.2 | 16.4 |
| 2700    | Cyprus       | L1b1* | L-L.656+ L349- | 35.1 | 33.4 |
| N36293  | Hungary      | L1b1* | L-L.656+ L349- | 47.4 | 19.2 |
| 188710  | Iraq         | L1b1* | L-L.656+ L349- | 33.3 | 44.4 |
| 131738  | Ireland      | L1b1* | L-L.656+ L349- | 53.3 | 6.3  |
| 214163  | Italy        | L1b1* | L-L.656+ L349- | 41.9 | 12.5 |
| 199893  | Italy        | L1b1* | L-L.656+ L349- | 41.9 | 12.5 |
| M7148   | Kuwait       | L1b1* | L-L.656+ L349- | 29.4 | 47.9 |
| 192340  | Lebanon      | L1b1* | L-L.656+ L349- | 33.4 | 35.5 |
| 43426   | Lebanon      | L1b1* | L-L.656+ L349- | 33.4 | 35.5 |
| E9533   | Lebanon      | L1b1* | L-L.656+ L349- | 33.4 | 35.5 |
| 192812  | Portugal     | L1b1* | L-L.656+ L349- | 38.8 | -9.1 |
| 177996  | UK           | L1b1* | L-L.656+ L349- | 51.5 | 0.1  |
| 189701  | Armenia      | L1b1a | L-M349         | 40.2 | 44.5 |
| N65296  | Austria      | L1b1a | L-M349         | 48.2 | 16.4 |
| N23180  | Belarus      | L1b1a | L-M349         | 53.9 | 27.6 |
| N35596  | Belgium      | L1b1a | L-M349         | 50.8 | 4.4  |
| N61542  | Belgium      | L1b1a | L-M349         | 50.8 | 4.4  |
| 1929    | Egypt        | L1b1a | L-M349         | 30.1 | 31.2 |
| E14514  | France       | L1b1a | L-M349         | 48.9 | 2.4  |
| E9935   | Germany      | L1b1a | L-M349         | 52.5 | 13.4 |
| 42998   | Germany      | L1b1a | L-M349         | 52.5 | 13.4 |
| E6106   | Germany      | L1b1a | L-M349         | 52.5 | 13.4 |
| 199082  | Germany      | L1b1a | L-M349         | 52.5 | 13.4 |
| 204455  | Germany      | L1b1a | L-M349         | 52.5 | 13.4 |
| 87087   | Hungary      | L1b1a | L-M349         | 47.4 | 19.2 |

|        |             |       |        |      |      |
|--------|-------------|-------|--------|------|------|
| N13722 | Italy       | L1b1a | L-M349 | 41.9 | 12.5 |
| 174541 | Italy       | L1b1a | L-M349 | 41.9 | 12.5 |
| 206245 | Italy       | L1b1a | L-M349 | 41.9 | 12.5 |
| N31383 | Italy       | L1b1a | L-M349 | 41.9 | 12.5 |
| 47636  | Italy       | L1b1a | L-M349 | 41.9 | 12.5 |
| 160419 | Italy       | L1b1a | L-M349 | 41.9 | 12.5 |
| N40167 | Levant      | L1b1a | L-M349 | 33.4 | 35.5 |
| N87113 | Levant      | L1b1a | L-M349 | 33.4 | 35.5 |
| 220233 | Levant      | L1b1a | L-M349 | 33.4 | 35.5 |
| 50919  | Levant      | L1b1a | L-M349 | 33.4 | 35.5 |
| N16892 | Poland      | L1b1a | L-M349 | 52.2 | 21   |
| N36807 | Portugal    | L1b1a | L-M349 | 38.8 | -9.1 |
| N14889 | Portugal    | L1b1a | L-M349 | 38.8 | -9.1 |
| 150532 | Romania     | L1b1a | L-M349 | 44.4 | 26.1 |
| 133667 | Spain       | L1b1a | L-M349 | 40.4 | -3.7 |
| 45035  | Switzerland | L1b1a | L-M349 | 46.9 | 7.4  |
| N36437 | Switzerland | L1b1a | L-M349 | 46.9 | 7.4  |
| N22678 | Switzerland | L1b1a | L-M349 | 46.9 | 7.4  |
| 133397 | Switzerland | L1b1a | L-M349 | 46.9 | 7.4  |
| N34974 | Switzerland | L1b1a | L-M349 | 46.9 | 7.4  |
| 117926 | Switzerland | L1b1a | L-M349 | 46.9 | 7.4  |
| 84040  | Switzerland | L1b1a | L-M349 | 46.9 | 7.4  |
| 158227 | Switzerland | L1b1a | L-M349 | 46.9 | 7.4  |
| 119235 | Turkey      | L1b1a | L-M349 | 39.9 | 32.9 |
| 94500  | Turkey      | L1b1a | L-M349 | 39.9 | 32.9 |
| 207728 | Turkey      | L1b1a | L-M349 | 39.9 | 32.9 |
| 10566  | UK          | L1b1a | L-M349 | 51.5 | 0.1  |
| 126095 | UK          | L1b1a | L-M349 | 51.5 | 0.1  |
| N13579 | Afghanistan | L1c   | L-M357 | 34.5 | 69.2 |
| 47957  | Afghanistan | L1c   | L-M357 | 34.5 | 69.2 |
| 117209 | Afghanistan | L1c   | L-M357 | 34.5 | 69.2 |
| 150710 | Afghanistan | L1c   | L-M357 | 34.5 | 69.2 |
| N15249 | Afghanistan | L1c   | L-M357 | 34.5 | 69.2 |
| N67050 | Afghanistan | L1c   | L-M357 | 34.5 | 69.2 |
| 228196 | Armenia     | L1c   | L-M357 | 40.2 | 44.5 |
| 39112  | India       | L1c   | L-M357 | 21   | 78   |
| 130229 | India       | L1c   | L-M357 | 21   | 78   |
| 134699 | India       | L1c   | L-M357 | 21   | 78   |
| 159251 | India       | L1c   | L-M357 | 21   | 78   |
| 171543 | India       | L1c   | L-M357 | 21   | 78   |
| 83541  | India       | L1c   | L-M357 | 21   | 78   |
| 165503 | India       | L1c   | L-M357 | 21   | 78   |
| N16084 | India       | L1c   | L-M357 | 21   | 78   |
| N90087 | India       | L1c   | L-M357 | 21   | 78   |
| 112920 | India       | L1c   | L-M357 | 21   | 78   |
| N91548 | India       | L1c   | L-M357 | 21   | 78   |
| 193345 | Iraq        | L1c   | L-M357 | 33.3 | 44.4 |
| 94149  | Italy       | L1c   | L-M357 | 41.9 | 12.5 |
| M7326  | Kuwait      | L1c   | L-M357 | 29.4 | 47.9 |
| M7428  | Kuwait      | L1c   | L-M357 | 29.4 | 47.9 |
| M7548  | Kuwait      | L1c   | L-M357 | 29.4 | 47.9 |
| 1318   | Pakistan    | L1c   | L-M357 | 33.7 | 73.2 |
| 57970  | Pakistan    | L1c   | L-M357 | 33.7 | 73.2 |
| 69056  | Pakistan    | L1c   | L-M357 | 33.7 | 73.2 |

|        |              |       |                 |      |       |
|--------|--------------|-------|-----------------|------|-------|
| 69067  | Pakistan     | L1c   | L-M357          | 33.7 | 73.2  |
| 110998 | Pakistan     | L1c   | L-M357          | 33.7 | 73.2  |
| N54263 | Pakistan     | L1c   | L-M357          | 33.7 | 73.2  |
| N74967 | Pakistan     | L1c   | L-M357          | 33.7 | 73.2  |
| M6759  | Saudi Arabia | L1c   | L-M357          | 24.6 | 46.7  |
| M7661  | Saudi Arabia | L1c   | L-M357          | 24.6 | 46.7  |
| 176674 | Armenia      | Q1a2  | Q-M25           | 40.2 | 44.5  |
| 41920  | Germany      | Q1a2  | Q-M25           | 52.5 | 13.4  |
| 79694  | Hungary      | Q1a2  | Q-M25           | 47.4 | 19.2  |
| 155314 | Hungary      | Q1a2  | Q-M25           | 47.4 | 19.2  |
| 155304 | Hungary      | Q1a2  | Q-M25           | 47.4 | 19.2  |
| 155308 | Hungary      | Q1a2  | Q-M25           | 47.4 | 19.2  |
| 109759 | Hungary      | Q1a2  | Q-M25           | 47.4 | 19.2  |
| 79135  | Hungary      | Q1a2  | Q-M25           | 47.4 | 19.2  |
| 79133  | Hungary      | Q1a2  | Q-M25           | 47.4 | 19.2  |
| 216493 | India        | Q1a2  | Q-M25           | 21   | 78    |
| N47526 | Iran         | Q1a2  | Q-M25           | 35.7 | 51.4  |
| 53601  | Ireland      | Q1a2  | Q-M25           | 53.3 | 6.3   |
| N20234 | Italy        | Q1a2  | Q-M25           | 41.9 | 12.5  |
| 178386 | Mongolia     | Q1a2  | Q-M25           | 47.9 | 106.9 |
| N94588 | Poland       | Q1a2  | Q-M25           | 52.2 | 21    |
| 180029 | Poland       | Q1a2  | Q-M25           | 52.2 | 21    |
| 167321 | Russia       | Q1a2  | Q-M25           | 55.7 | 37.6  |
| 39998  | Russia       | Q1a2  | Q-M25           | 55.7 | 37.6  |
| 199034 | Russia       | Q1a2  | Q-M25           | 55.7 | 37.6  |
| N71504 | Russia       | Q1a2  | Q-M25           | 55.7 | 37.6  |
| 176187 | Saudi Arabia | Q1a2  | Q-M25           | 24.6 | 46.7  |
| 88698  | Afghanistan  | Q1a3* | M346+ M3- L213- | 34.5 | 69.2  |
| 218769 | Armenia      | Q1a3* | M346+ M3- L213- | 40.2 | 44.5  |
| N84508 | Bosnia       | Q1a3* | M346+ M3- L213- | 43.9 | 18.4  |
| 19564  | Germany      | Q1a3* | M346+ M3- L213- | 52.5 | 13.4  |
| N88758 | Germany      | Q1a3* | M346+ M3- L213- | 52.5 | 13.4  |
| 160059 | Hungary      | Q1a3* | M346+ M3- L213- | 47.4 | 19.2  |
| 47960  | India        | Q1a3* | M346+ M3- L213- | 21   | 78    |
| 152470 | India        | Q1a3* | M346+ M3- L213- | 21   | 78    |
| N20284 | India        | Q1a3* | M346+ M3- L213- | 21   | 78    |
| N45070 | India        | Q1a3* | M346+ M3- L213- | 21   | 78    |
| N57946 | India        | Q1a3* | M346+ M3- L213- | 21   | 78    |
| N61141 | India        | Q1a3* | M346+ M3- L213- | 21   | 78    |
| N64267 | India        | Q1a3* | M346+ M3- L213- | 21   | 78    |
| N68722 | India        | Q1a3* | M346+ M3- L213- | 21   | 78    |
| N73100 | India        | Q1a3* | M346+ M3- L213- | 21   | 78    |
| 139352 | Ireland      | Q1a3* | M346+ M3- L213- | 53.3 | 6.3   |
| 234338 | Italy        | Q1a3* | M346+ M3- L213- | 41.9 | 12.5  |
| 170259 | Lithuania    | Q1a3* | M346+ M3- L213- | 54.7 | 25.3  |
| 185943 | Norway       | Q1a3* | M346+ M3- L213- | 59.9 | 10.7  |
| N31676 | Norway       | Q1a3* | M346+ M3- L213- | 59.9 | 10.7  |
| N65568 | Pakistan     | Q1a3* | M346+ M3- L213- | 33.7 | 73.2  |
| 128283 | Poland       | Q1a3* | M346+ M3- L213- | 52.2 | 21    |
| 166847 | Portugal     | Q1a3* | M346+ M3- L213- | 38.8 | -9.1  |
| 213436 | Russia       | Q1a3* | M346+ M3- L213- | 55.7 | 37.6  |
| 160290 | Saudi Arabia | Q1a3* | M346+ M3- L213- | 24.6 | 46.7  |
| 29279  | Sweden       | Q1a3* | M346+ M3- L213- | 59.4 | 18.1  |
| E79WK  | Sweden       | Q1a3* | M346+ M3- L213- | 59.4 | 18.1  |

|         |         |        |                         |      |      |
|---------|---------|--------|-------------------------|------|------|
| N92580  | Sweden  | Q1a3*  | M346+ M3- L213-         | 59.4 | 18.1 |
| 190477  | Turkey  | Q1a3*  | M346+ M3- L213-         | 39.9 | 32.9 |
| 194161  | Turkey  | Q1a3*  | M346+ M3- L213-         | 39.9 | 32.9 |
| N62232  | Turkey  | Q1a3*  | M346+ M3- L213-         | 39.9 | 32.9 |
| 144820  | UAE     | Q1a3*  | M346+ M3- L213-         | 24.5 | 54.4 |
| 188317  | UAE     | Q1a3*  | M346+ M3- L213-         | 24.5 | 54.4 |
| M4285   | UAE     | Q1a3*  | M346+ M3- L213-         | 24.5 | 54.4 |
| 48619   | UK      | Q1a3*  | M346+ M3- L213-         | 51.5 | 0.1  |
| 113515  | UK      | Q1a3*  | M346+ M3- L213-         | 51.5 | 0.1  |
| 147201  | UK      | Q1a3*  | M346+ M3- L213-         | 51.5 | 0.1  |
| N24383  | UK      | Q1a3*  | M346+ M3- L213-         | 51.5 | 0.1  |
| N32407  | UK      | Q1a3*  | M346+ M3- L213-         | 51.5 | 0.1  |
| N6045   | UK      | Q1a3*  | M346+ M3- L213-         | 51.5 | 0.1  |
| 162168  | Germany | Q1a3a* | Q-M346+ L213+ L804+ M3- | 52.5 | 13.4 |
| 28136   | Ireland | Q1a3a* | Q-M346+ L213+ L804+ M3- | 53.3 | 6.3  |
| 30599   | Ireland | Q1a3a* | Q-M346+ L213+ L804+ M3- | 53.3 | 6.3  |
| 185943  | Norway  | Q1a3a* | Q-M346+ L213+ L804+ M3- | 59.9 | 10.7 |
| N31676  | Norway  | Q1a3a* | Q-M346+ L213+ L804+ M3- | 59.9 | 10.7 |
| 58079   | Norway  | Q1a3a* | Q-M346+ L213+ L804+ M3- | 59.9 | 10.7 |
| 65198   | Norway  | Q1a3a* | Q-M346+ L213+ L804+ M3- | 59.9 | 10.7 |
| 200099  | Norway  | Q1a3a* | Q-M346+ L213+ L804+ M3- | 59.9 | 10.7 |
| N50723  | Sweden  | Q1a3a* | Q-M346+ L213+ L804+ M3- | 59.4 | 18.1 |
| N3263   | Sweden  | Q1a3a* | Q-M346+ L213+ L804+ M3- | 59.4 | 18.1 |
| 101297  | Sweden  | Q1a3a* | Q-M346+ L213+ L804+ M3- | 59.4 | 18.1 |
| N23068  | Sweden  | Q1a3a* | Q-M346+ L213+ L804+ M3- | 59.4 | 18.1 |
| N38159  | Sweden  | Q1a3a* | Q-M346+ L213+ L804+ M3- | 59.4 | 18.1 |
| N92580  | Sweden  | Q1a3a* | Q-M346+ L213+ L804+ M3- | 59.4 | 18.1 |
| 29279   | Sweden  | Q1a3a* | Q-M346+ L213+ L804+ M3- | 59.4 | 18.1 |
| 48315   | UK      | Q1a3a* | Q-M346+ L213+ L804+ M3- | 51.5 | 0.1  |
| 147201  | UK      | Q1a3a* | Q-M346+ L213+ L804+ M3- | 51.5 | 0.1  |
| N5430   | UK      | Q1a3a* | Q-M346+ L213+ L804+ M3- | 51.5 | 0.1  |
| N101906 | UK      | Q1a3a* | Q-M346+ L213+ L804+ M3- | 51.5 | 0.1  |
| 113515  | UK      | Q1a3a* | Q-M346+ L213+ L804+ M3- | 51.5 | 0.1  |
| 228656  | UK      | Q1a3a* | Q-M346+ L213+ L804+ M3- | 51.5 | 0.1  |
| N40362  | UK      | Q1a3a* | Q-M346+ L213+ L804+ M3- | 51.5 | 0.1  |
| 34900   | Belarus | Q1b1a  | Q-L245                  | 53.9 | 27.6 |
| 20102   | Belarus | Q1b1a  | Q-L245                  | 53.9 | 27.6 |
| N15254  | Bosnia  | Q1b1a  | Q-L245                  | 43.9 | 18.4 |
| 3791    | Estonia | Q1b1a  | Q-L245                  | 59.4 | 24.7 |
| 142386  | Germany | Q1b1a  | Q-L245                  | 52.5 | 13.4 |
| 195885  | Germany | Q1b1a  | Q-L245                  | 52.5 | 13.4 |
| 82698   | Germany | Q1b1a  | Q-L245                  | 52.5 | 13.4 |
| 93226   | Germany | Q1b1a  | Q-L245                  | 52.5 | 13.4 |
| N36804  | Germany | Q1b1a  | Q-L245                  | 52.5 | 13.4 |
| 50021   | Hungary | Q1b1a  | Q-L245                  | 47.4 | 19.2 |
| 173631  | Iran    | Q1b1a  | Q-L245                  | 35.7 | 51.4 |
| 204938  | Iraq    | Q1b1a  | Q-L245                  | 33.3 | 44.4 |
| 192774  | Iraq    | Q1b1a  | Q-L245                  | 33.3 | 44.4 |
| 197506  | Iraq    | Q1b1a  | Q-L245                  | 33.3 | 44.4 |
| 172691  | Ireland | Q1b1a  | Q-L245                  | 53.3 | 6.3  |
| 237760  | Italy   | Q1b1a  | Q-L245                  | 41.9 | 12.5 |
| 51935   | Latvia  | Q1b1a  | Q-L245                  | 56.9 | 24.1 |
| 138817  | Latvia  | Q1b1a  | Q-L245                  | 56.9 | 24.1 |
| N23549  | Latvia  | Q1b1a  | Q-L245                  | 56.9 | 24.1 |

|         |              |          |                    |      |      |
|---------|--------------|----------|--------------------|------|------|
| 80706   | Lithuania    | Q1b1a    | Q-L245             | 54.7 | 25.3 |
| 115493  | Lithuania    | Q1b1a    | Q-L245             | 54.7 | 25.3 |
| 1315    | Lithuania    | Q1b1a    | Q-L245             | 54.7 | 25.3 |
| 184532  | Lithuania    | Q1b1a    | Q-L245             | 54.7 | 25.3 |
| N88858  | Lithuania    | Q1b1a    | Q-L245             | 54.7 | 25.3 |
| 165402  | Netherlands  | Q1b1a    | Q-L245             | 52.4 | 4.9  |
| 148637  | Poland       | Q1b1a    | Q-L245             | 52.2 | 21   |
| 172625  | Poland       | Q1b1a    | Q-L245             | 52.2 | 21   |
| N60780  | Poland       | Q1b1a    | Q-L245             | 52.2 | 21   |
| 229377  | Poland       | Q1b1a    | Q-L245             | 52.2 | 21   |
| 200010  | Poland       | Q1b1a    | Q-L245             | 52.2 | 21   |
| N94601  | Russia       | Q1b1a    | Q-L245             | 55.7 | 37.6 |
| N102874 | Saudi Arabia | Q1b1a    | Q-L245             | 24.6 | 46.7 |
| N63269  | Switzerland  | Q1b1a    | Q-L245             | 46.9 | 7.4  |
| 115454  | Switzerland  | Q1b1a    | Q-L245             | 46.9 | 7.4  |
| 76487   | Syria        | Q1b1a    | Q-L245             | 33.5 | 36.3 |
| M7181   | Turkey       | Q1b1a    | Q-L245             | 39.9 | 32.9 |
| 173902  | Turkey       | Q1b1a    | Q-L245             | 39.9 | 32.9 |
| 178717  | Turkey       | Q1b1a    | Q-L245             | 39.9 | 32.9 |
| 45830   | Ukraine      | Q1b1a    | Q-L245             | 50.4 | 30.5 |
| 196332  | Ukraine      | Q1b1a    | Q-L245             | 50.4 | 30.5 |
| 117351  | Ukraine      | Q1b1a    | Q-L245             | 50.4 | 30.5 |
| 45731   | Ukraine      | Q1b1a    | Q-L245             | 50.4 | 30.5 |
| N77266  | Armenia      | R1a1a1*  | Z93+ L342.2- L657- | 40.2 | 44.5 |
| 202574  | Armenia      | R1a1a1*  | Z93+ L342.2- L657- | 40.2 | 44.5 |
| 208164  | Italy        | R1a1a1*  | Z93+ L342.2- L657- | 41.9 | 12.5 |
| 217611  | Kazakhstan   | R1a1a1*  | Z93+ L342.2- L657- | 51.2 | 71.4 |
| 188931  | Kuwait       | R1a1a1*  | Z93+ L342.2- L657- | 29.4 | 47.9 |
| 201431  | Kuwait       | R1a1a1*  | Z93+ L342.2- L657- | 29.4 | 47.9 |
| M6469   | Oman         | R1a1a1*  | Z93+ L342.2- L657- | 23.6 | 58.5 |
| M6630   | Oman         | R1a1a1*  | Z93+ L342.2- L657- | 23.6 | 58.5 |
| 48908   | Poland       | R1a1a1*  | Z93+ L342.2- L657- | 52.2 | 21   |
| 221419  | Russia       | R1a1a1*  | Z93+ L342.2- L657- | 55.7 | 37.6 |
| 189816  | Russia       | R1a1a1*  | Z93+ L342.2- L657- | 55.7 | 37.6 |
| M7858   | Saudi Arabia | R1a1a1*  | Z93+ L342.2- L657- | 24.6 | 46.7 |
| 204324  | Saudi Arabia | R1a1a1*  | Z93+ L342.2- L657- | 24.6 | 46.7 |
| 234858  | Saudi Arabia | R1a1a1*  | Z93+ L342.2- L657- | 24.6 | 46.7 |
| M6712   | Saudi Arabia | R1a1a1*  | Z93+ L342.2- L657- | 24.6 | 46.7 |
| M7171   | Saudi Arabia | R1a1a1*  | Z93+ L342.2- L657- | 24.6 | 46.7 |
| 166189  | Tunisia      | R1a1a1*  | Z93+ L342.2- L657- | 36.8 | 10.2 |
| 166190  | Tunisia      | R1a1a1*  | Z93+ L342.2- L657- | 36.8 | 10.2 |
| 209438  | Turkey       | R1a1a1*  | Z93+ L342.2- L657- | 39.9 | 32.9 |
| 222776  | Turkey       | R1a1a1*  | Z93+ L342.2- L657- | 39.9 | 32.9 |
| 212823  | Turkey       | R1a1a1*  | Z93+ L342.2- L657- | 39.9 | 32.9 |
| 42050   | Turkey       | R1a1a1*  | Z93+ L342.2- L657- | 39.9 | 32.9 |
| 182325  | UAE          | R1a1a1*  | Z93+ L342.2- L657- | 24.5 | 54.4 |
| M6507   | UAE          | R1a1a1*  | Z93+ L342.2- L657- | 24.5 | 54.4 |
| 167830  | UK           | R1a1a1*  | Z93+ L342.2- L657- | 51.5 | 0.1  |
| 226562  | UK           | R1a1a1*  | Z93+ L342.2- L657- | 51.5 | 0.1  |
| 127747  | UK           | R1a1a1*  | Z93+ L342.2- L657- | 51.5 | 0.1  |
| N10407  | UK           | R1a1a1*  | Z93+ L342.2- L657- | 51.5 | 0.1  |
| N49878  | Afghanistan  | R1a1a1h1 | L342.2+ L657-      | 34.5 | 69.2 |
| 192072  | Armenia      | R1a1a1h1 | L342.2+ L657-      | 40.2 | 44.5 |
| B1000   | Armenia      | R1a1a1h1 | L342.2+ L657-      | 40.2 | 44.5 |



|         |              |          |               |      |      |
|---------|--------------|----------|---------------|------|------|
| M6890   | Egypt        | R1a1a1h1 | L342.2+ L657- | 30.1 | 31.2 |
| 216686  | Georgia      | R1a1a1h1 | L342.2+ L657- | 41.7 | 44.8 |
| 13091   | Germany      | R1a1a1h1 | L342.2+ L657- | 52.5 | 13.4 |
| E11612  | Germany      | R1a1a1h1 | L342.2+ L657- | 52.5 | 13.4 |
| 164030  | Hungary      | R1a1a1h1 | L342.2+ L657- | 47.4 | 19.2 |
| 197670  | India        | R1a1a1h1 | L342.2+ L657- | 21   | 78   |
| N101746 | India        | R1a1a1h1 | L342.2+ L657- | 21   | 78   |
| N3798   | India        | R1a1a1h1 | L342.2+ L657- | 21   | 78   |
| N77532  | India        | R1a1a1h1 | L342.2+ L657- | 21   | 78   |
| 160543  | Iraq         | R1a1a1h1 | L342.2+ L657- | 33.3 | 44.4 |
| H1483   | Iraq         | R1a1a1h1 | L342.2+ L657- | 33.3 | 44.4 |
| 214566  | Kazakhstan   | R1a1a1h1 | L342.2+ L657- | 51.2 | 71.4 |
| 164862  | Kuwait       | R1a1a1h1 | L342.2+ L657- | 29.4 | 47.9 |
| M6458   | Kuwait       | R1a1a1h1 | L342.2+ L657- | 29.4 | 47.9 |
| M7013   | Kuwait       | R1a1a1h1 | L342.2+ L657- | 29.4 | 47.9 |
| M7432   | Kuwait       | R1a1a1h1 | L342.2+ L657- | 29.4 | 47.9 |
| 111287  | Kyrgyzstan   | R1a1a1h1 | L342.2+ L657- | 42.9 | 74.6 |
| 116213  | Levant       | R1a1a1h1 | L342.2+ L657- | 33.4 | 35.5 |
| 177949  | Lithuania    | R1a1a1h1 | L342.2+ L657- | 54.7 | 25.3 |
| M6469   | Oman         | R1a1a1h1 | L342.2+ L657- | 23.6 | 58.5 |
| 181089  | Pakistan     | R1a1a1h1 | L342.2+ L657- | 33.7 | 73.2 |
| 160271  | Qatar        | R1a1a1h1 | L342.2+ L657- | 25.3 | 51.5 |
| 184336  | Qatar        | R1a1a1h1 | L342.2+ L657- | 25.3 | 51.5 |
| M6285   | Qatar        | R1a1a1h1 | L342.2+ L657- | 25.3 | 51.5 |
| 79138   | Romania      | R1a1a1h1 | L342.2+ L657- | 44.4 | 26.1 |
| N97469  | Romania      | R1a1a1h1 | L342.2+ L657- | 44.4 | 26.1 |
| 202698  | Russia       | R1a1a1h1 | L342.2+ L657- | 55.7 | 37.6 |
| 210272  | Russia       | R1a1a1h1 | L342.2+ L657- | 55.7 | 37.6 |
| M6183   | Saudi Arabia | R1a1a1h1 | L342.2+ L657- | 24.6 | 46.7 |
| M6698   | Saudi Arabia | R1a1a1h1 | L342.2+ L657- | 24.6 | 46.7 |
| M6851   | Saudi Arabia | R1a1a1h1 | L342.2+ L657- | 24.6 | 46.7 |
| M6853   | Saudi Arabia | R1a1a1h1 | L342.2+ L657- | 24.6 | 46.7 |
| M6982   | Saudi Arabia | R1a1a1h1 | L342.2+ L657- | 24.6 | 46.7 |
| 157103  | Saudi Arabia | R1a1a1h1 | L342.2+ L657- | 24.6 | 46.7 |
| 161602  | Saudi Arabia | R1a1a1h1 | L342.2+ L657- | 24.6 | 46.7 |
| 162855  | Saudi Arabia | R1a1a1h1 | L342.2+ L657- | 24.6 | 46.7 |
| 172811  | Saudi Arabia | R1a1a1h1 | L342.2+ L657- | 24.6 | 46.7 |
| 178906  | Saudi Arabia | R1a1a1h1 | L342.2+ L657- | 24.6 | 46.7 |
| 178907  | Saudi Arabia | R1a1a1h1 | L342.2+ L657- | 24.6 | 46.7 |
| 207608  | Saudi Arabia | R1a1a1h1 | L342.2+ L657- | 24.6 | 46.7 |
| 216270  | Saudi Arabia | R1a1a1h1 | L342.2+ L657- | 24.6 | 46.7 |
| M6280   | Saudi Arabia | R1a1a1h1 | L342.2+ L657- | 24.6 | 46.7 |
| M6895   | Saudi Arabia | R1a1a1h1 | L342.2+ L657- | 24.6 | 46.7 |
| M7199   | Saudi Arabia | R1a1a1h1 | L342.2+ L657- | 24.6 | 46.7 |
| M6699   | Saudi Arabia | R1a1a1h1 | L342.2+ L657- | 24.6 | 46.7 |
| 2914    | Syria        | R1a1a1h1 | L342.2+ L657- | 33.5 | 36.3 |
| 158657  | Turkey       | R1a1a1h1 | L342.2+ L657- | 39.9 | 32.9 |
| 179005  | Turkey       | R1a1a1h1 | L342.2+ L657- | 39.9 | 32.9 |
| 227190  | Turkey       | R1a1a1h1 | L342.2+ L657- | 39.9 | 32.9 |
| 167393  | UAE          | R1a1a1h1 | L342.2+ L657- | 24.5 | 54.4 |
| 196269  | UAE          | R1a1a1h1 | L342.2+ L657- | 24.5 | 54.4 |
| 214554  | UAE          | R1a1a1h1 | L342.2+ L657- | 24.5 | 54.4 |
| M6132   | UAE          | R1a1a1h1 | L342.2+ L657- | 24.5 | 54.4 |
| M6966   | UAE          | R1a1a1h1 | L342.2+ L657- | 24.5 | 54.4 |

|         |                |           |               |      |      |
|---------|----------------|-----------|---------------|------|------|
| M7001   | UAE            | R1a1a1h1  | L342.2+ L657- | 24.5 | 54.4 |
| B1139   | UK             | R1a1a1h1  | L342.2+ L657- | 51.5 | 0.1  |
| 209969  | Ukraine        | R1a1a1h1  | L342.2+ L657- | 50.4 | 30.5 |
| N30333  | Ukraine        | R1a1a1h1  | L342.2+ L657- | 50.4 | 30.5 |
| M7176   | Bahrain        | R1a1a1h1a | L342.2+ L657+ | 26.2 | 50.6 |
| NA20846 | India          | R1a1a1h1a | L342.2+ L657+ | 21   | 78   |
| N78906  | India          | R1a1a1h1a | L342.2+ L657+ | 21   | 78   |
| N12617  | India          | R1a1a1h1a | L342.2+ L657+ | 21   | 78   |
| N76161  | India          | R1a1a1h1a | L342.2+ L657+ | 21   | 78   |
| N2358   | India          | R1a1a1h1a | L342.2+ L657+ | 21   | 78   |
| 163483  | India          | R1a1a1h1a | L342.2+ L657+ | 21   | 78   |
| N22414  | India          | R1a1a1h1a | L342.2+ L657+ | 21   | 78   |
| U2321   | India          | R1a1a1h1a | L342.2+ L657+ | 21   | 78   |
| N6841   | India          | R1a1a1h1a | L342.2+ L657+ | 21   | 78   |
| M6736   | Iran           | R1a1a1h1a | L342.2+ L657+ | 35.7 | 51.4 |
| 112208  | Kazakhstan     | R1a1a1h1a | L342.2+ L657+ | 51.2 | 71.4 |
| 234103  | Kuwait         | R1a1a1h1a | L342.2+ L657+ | 29.4 | 47.9 |
| 216619  | Pakistan       | R1a1a1h1a | L342.2+ L657+ | 33.7 | 73.2 |
| N102178 | Pakistan       | R1a1a1h1a | L342.2+ L657+ | 33.7 | 73.2 |
| U2810   | Pakistan       | R1a1a1h1a | L342.2+ L657+ | 33.7 | 73.2 |
| M6308   | Qatar          | R1a1a1h1a | L342.2+ L657+ | 25.3 | 51.5 |
| M7041   | Qatar          | R1a1a1h1a | L342.2+ L657+ | 25.3 | 51.5 |
| 158432  | Saudi Arabia   | R1a1a1h1a | L342.2+ L657+ | 24.6 | 46.7 |
| 188795  | Saudi Arabia   | R1a1a1h1a | L342.2+ L657+ | 24.6 | 46.7 |
| 189737  | Saudi Arabia   | R1a1a1h1a | L342.2+ L657+ | 24.6 | 46.7 |
| 189739  | Saudi Arabia   | R1a1a1h1a | L342.2+ L657+ | 24.6 | 46.7 |
| 190263  | Saudi Arabia   | R1a1a1h1a | L342.2+ L657+ | 24.6 | 46.7 |
| 195320  | Saudi Arabia   | R1a1a1h1a | L342.2+ L657+ | 24.6 | 46.7 |
| 240464  | Saudi Arabia   | R1a1a1h1a | L342.2+ L657+ | 24.6 | 46.7 |
| M6740   | Saudi Arabia   | R1a1a1h1a | L342.2+ L657+ | 24.6 | 46.7 |
| M7290   | Saudi Arabia   | R1a1a1h1a | L342.2+ L657+ | 24.6 | 46.7 |
| M7417   | Saudi Arabia   | R1a1a1h1a | L342.2+ L657+ | 24.6 | 46.7 |
| M6303   | Saudi Arabia   | R1a1a1h1a | L342.2+ L657+ | 24.6 | 46.7 |
| 74750   | Turkey         | R1a1a1h1a | L342.2+ L657+ | 39.9 | 32.9 |
| M6646   | UAE            | R1a1a1h1a | L342.2+ L657+ | 24.5 | 54.4 |
| M6986   | UAE            | R1a1a1h1a | L342.2+ L657+ | 24.5 | 54.4 |
| M7443   | UAE            | R1a1a1h1a | L342.2+ L657+ | 24.5 | 54.4 |
| E12439  | Albania        | R1b1a2a1a | R-L150+       | 41.3 | 19.8 |
| 128958  | Armenia        | R1b1a2a1a | R-L150+       | 40.2 | 44.5 |
| 176676  | Armenia        | R1b1a2a1a | R-L150+       | 40.2 | 44.5 |
| 207694  | Armenia        | R1b1a2a1a | R-L150+       | 40.2 | 44.5 |
| 164210  | Armenia        | R1b1a2a1a | R-L150+       | 40.2 | 44.5 |
| 152974  | Armenia        | R1b1a2a1a | R-L150+       | 40.2 | 44.5 |
| 195750  | Armenia        | R1b1a2a1a | R-L150+       | 40.2 | 44.5 |
| 149197  | Armenia        | R1b1a2a1a | R-L150+       | 40.2 | 44.5 |
| 152975  | Armenia        | R1b1a2a1a | R-L150+       | 40.2 | 44.5 |
| 149196  | Armenia        | R1b1a2a1a | R-L150+       | 40.2 | 44.5 |
| 152977  | Armenia        | R1b1a2a1a | R-L150+       | 40.2 | 44.5 |
| 189660  | Bulgaria       | R1b1a2a1a | R-L150+       | 42.7 | 23.3 |
| 118282  | Croatia        | R1b1a2a1a | R-L150+       | 45.8 | 16   |
| 54168   | Czech Republic | R1b1a2a1a | R-L150+       | 50.1 | 14.5 |
| N70876  | Denmark        | R1b1a2a1a | R-L150+       | 55.7 | 12.6 |
| 102551  | France         | R1b1a2a1a | R-L150+       | 48.9 | 2.4  |
| 8U3YQ   | Germany        | R1b1a2a1a | R-L150+       | 52.5 | 13.4 |

|         |             |           |         |      |      |
|---------|-------------|-----------|---------|------|------|
| 140135  | Germany     | R1b1a2a1a | R-L150+ | 52.5 | 13.4 |
| 161457  | Germany     | R1b1a2a1a | R-L150+ | 52.5 | 13.4 |
| 7PJJJ   | Germany     | R1b1a2a1a | R-L150+ | 52.5 | 13.4 |
| 91989   | Germany     | R1b1a2a1a | R-L150+ | 52.5 | 13.4 |
| 87265   | Greece      | R1b1a2a1a | R-L150+ | 37.9 | 23.7 |
| 162445  | Greece      | R1b1a2a1a | R-L150+ | 37.9 | 23.7 |
| 191402  | Greece      | R1b1a2a1a | R-L150+ | 37.9 | 23.7 |
| 121597  | Hungary     | R1b1a2a1a | R-L150+ | 47.4 | 19.2 |
| N83705  | Iraq        | R1b1a2a1a | R-L150+ | 33.3 | 44.4 |
| 148406  | Ireland     | R1b1a2a1a | R-L150+ | 53.3 | 6.3  |
| 178343  | Ireland     | R1b1a2a1a | R-L150+ | 53.3 | 6.3  |
| 5811    | Ireland     | R1b1a2a1a | R-L150+ | 53.3 | 6.3  |
| 209781  | Ireland     | R1b1a2a1a | R-L150+ | 53.3 | 6.3  |
| 212712  | Italy       | R1b1a2a1a | R-L150+ | 41.9 | 12.5 |
| 30885   | Italy       | R1b1a2a1a | R-L150+ | 41.9 | 12.5 |
| E5276   | Italy       | R1b1a2a1a | R-L150+ | 41.9 | 12.5 |
| 95875   | Italy       | R1b1a2a1a | R-L150+ | 41.9 | 12.5 |
| 223828  | Kazakhstan  | R1b1a2a1a | R-L150+ | 51.2 | 71.4 |
| N97723  | Levant      | R1b1a2a1a | R-L150+ | 33.4 | 35.5 |
| 131176  | Levant      | R1b1a2a1a | R-L150+ | 33.4 | 35.5 |
| 66841   | Lithuania   | R1b1a2a1a | R-L150+ | 54.7 | 25.3 |
| 159189  | Netherlands | R1b1a2a1a | R-L150+ | 52.4 | 4.9  |
| 202070  | Pakistan    | R1b1a2a1a | R-L150+ | 33.7 | 73.2 |
| 92187   | Poland      | R1b1a2a1a | R-L150+ | 52.2 | 21   |
| N36978  | Poland      | R1b1a2a1a | R-L150+ | 52.2 | 21   |
| 9-21793 | Poland      | R1b1a2a1a | R-L150+ | 52.2 | 21   |
| N68231  | Poland      | R1b1a2a1a | R-L150+ | 52.2 | 21   |
| 202362  | Portugal    | R1b1a2a1a | R-L150+ | 38.8 | -9.1 |
| 198311  | Russia      | R1b1a2a1a | R-L150+ | 55.7 | 37.6 |
| 159888  | Russia      | R1b1a2a1a | R-L150+ | 55.7 | 37.6 |
| 152880  | Russia      | R1b1a2a1a | R-L150+ | 55.7 | 37.6 |
| N51668  | Spain       | R1b1a2a1a | R-L150+ | 40.4 | -3.7 |
| 6UQDH   | Spain       | R1b1a2a1a | R-L150+ | 40.4 | -3.7 |
| 177152  | Switzerland | R1b1a2a1a | R-L150+ | 46.9 | 7.4  |
| E5182   | Switzerland | R1b1a2a1a | R-L150+ | 46.9 | 7.4  |
| 70052   | Syria       | R1b1a2a1a | R-L150+ | 33.5 | 36.3 |
| 162059  | Turkey      | R1b1a2a1a | R-L150+ | 39.9 | 32.9 |
| 164229  | Turkey      | R1b1a2a1a | R-L150+ | 39.9 | 32.9 |
| N93606  | Turkey      | R1b1a2a1a | R-L150+ | 39.9 | 32.9 |
| 185690  | Turkey      | R1b1a2a1a | R-L150+ | 39.9 | 32.9 |
| 172019  | Turkey      | R1b1a2a1a | R-L150+ | 39.9 | 32.9 |
| 185783  | Turkey      | R1b1a2a1a | R-L150+ | 39.9 | 32.9 |
| M6266   | UAE         | R1b1a2a1a | R-L150+ | 24.5 | 54.4 |
| 234946  | UK          | R1b1a2a1a | R-L150+ | 51.5 | 0.1  |
| B1388   | UK          | R1b1a2a1a | R-L150+ | 51.5 | 0.1  |
| 72584   | UK          | R1b1a2a1a | R-L150+ | 51.5 | 0.1  |
| 35045   | UK          | R1b1a2a1a | R-L150+ | 51.5 | 0.1  |
| 26483   | UK          | R1b1a2a1a | R-L150+ | 51.5 | 0.1  |
| 196157  | UK          | R1b1a2a1a | R-L150+ | 51.5 | 0.1  |
| 3-10470 | UK          | R1b1a2a1a | R-L150+ | 51.5 | 0.1  |
| 34372   | UK          | R1b1a2a1a | R-L150+ | 51.5 | 0.1  |
| 82745   | UK          | R1b1a2a1a | R-L150+ | 51.5 | 0.1  |
| 16910   | UK          | R1b1a2a1a | R-L150+ | 51.5 | 0.1  |
| 194313  | UK          | R1b1a2a1a | R-L150+ | 51.5 | 0.1  |

|        |                |           |                          |      |      |
|--------|----------------|-----------|--------------------------|------|------|
| 206335 | UK             | R1b1a2a1a | R-L150+                  | 51.5 | 0.1  |
| 95535  | UK             | R1b1a2a1a | R-L150+                  | 51.5 | 0.1  |
| 43759  | UK             | R1b1a2a1a | R-L150+                  | 51.5 | 0.1  |
| 235098 | Ukraine        | R1b1a2a1a | R-L150+                  | 50.4 | 30.5 |
| 190448 | Ukraine        | R1b1a2a1a | R-L150+                  | 50.4 | 30.5 |
| 155694 | Armenia        | J2a*      | J-M410+ L26- M340- P279- | 40.2 | 44.5 |
| 194776 | Armenia        | J2a*      | J-M410+ L26- M340- P279- | 40.2 | 44.5 |
| 168300 | Austria        | J2a*      | J-M410+ L26- M340- P279- | 48.2 | 16.4 |
| 198791 | Belarus        | J2a*      | J-M410+ L26- M340- P279- | 53.9 | 27.6 |
| 32523  | France         | J2a*      | J-M410+ L26- M340- P279- | 48.9 | 2.4  |
| N86999 | France         | J2a*      | J-M410+ L26- M340- P279- | 48.9 | 2.4  |
| E10625 | Georgia        | J2a*      | J-M410+ L26- M340- P279- | 41.7 | 44.8 |
| 226181 | Germany        | J2a*      | J-M410+ L26- M340- P279- | 52.5 | 13.4 |
| 128474 | Germany        | J2a*      | J-M410+ L26- M340- P279- | 52.5 | 13.4 |
| 107132 | Germany        | J2a*      | J-M410+ L26- M340- P279- | 52.5 | 13.4 |
| E8073  | Italy          | J2a*      | J-M410+ L26- M340- P279- | 41.9 | 12.5 |
| 143591 | Italy          | J2a*      | J-M410+ L26- M340- P279- | 41.9 | 12.5 |
| 96954  | Italy          | J2a*      | J-M410+ L26- M340- P279- | 41.9 | 12.5 |
| 95743  | Latvia         | J2a*      | J-M410+ L26- M340- P279- | 56.9 | 24.1 |
| 163162 | Lebanon        | J2a*      | J-M410+ L26- M340- P279- | 33.4 | 35.5 |
| M6058  | Libya          | J2a*      | J-M410+ L26- M340- P279- | 32.9 | 13.2 |
| 135080 | Lithuania      | J2a*      | J-M410+ L26- M340- P279- | 54.7 | 25.3 |
| N14134 | Lithuania      | J2a*      | J-M410+ L26- M340- P279- | 54.7 | 25.3 |
| 155891 | Ossetia        | J2a*      | J-M410+ L26- M340- P279- | 41.7 | 44.8 |
| E4882  | Poland         | J2a*      | J-M410+ L26- M340- P279- | 52.2 | 21   |
| 210028 | Poland         | J2a*      | J-M410+ L26- M340- P279- | 52.2 | 21   |
| N40835 | Russia         | J2a*      | J-M410+ L26- M340- P279- | 55.7 | 37.6 |
| 119738 | Russia         | J2a*      | J-M410+ L26- M340- P279- | 55.7 | 37.6 |
| 127744 | Russia         | J2a*      | J-M410+ L26- M340- P279- | 55.7 | 37.6 |
| 216541 | Saudi Arabia   | J2a*      | J-M410+ L26- M340- P279- | 24.6 | 46.7 |
| 233412 | Spain          | J2a*      | J-M410+ L26- M340- P279- | 40.4 | -3.7 |
| 196834 | Ukraine        | J2a*      | J-M410+ L26- M340- P279- | 50.4 | 30.5 |
| N79407 | Ukraine        | J2a*      | J-M410+ L26- M340- P279- | 50.4 | 30.5 |
| 79325  | Czech Republic | R1a-L260  | R-M458+ L260+            | 50.1 | 14.5 |
| 12044  | Czech Republic | R1a-L260  | R-M458+ L260+            | 50.1 | 14.5 |
| E9693  | Czech Republic | R1a-L260  | R-M458+ L260+            | 50.1 | 14.5 |
| 26769  | Czech Republic | R1a-L260  | R-M458+ L260+            | 50.1 | 14.5 |
| E6057  | Germany        | R1a-L260  | R-M458+ L260+            | 52.5 | 13.4 |
| 162431 | Germany        | R1a-L260  | R-M458+ L260+            | 52.5 | 13.4 |
| 118487 | Hungary        | R1a-L260  | R-M458+ L260+            | 47.4 | 19.2 |
| 100432 | Poland         | R1a-L260  | R-M458+ L260+            | 52.2 | 21   |
| E11471 | Poland         | R1a-L260  | R-M458+ L260+            | 52.2 | 21   |
| N93969 | Poland         | R1a-L260  | R-M458+ L260+            | 52.2 | 21   |
| 194010 | Poland         | R1a-L260  | R-M458+ L260+            | 52.2 | 21   |
| 116518 | Poland         | R1a-L260  | R-M458+ L260+            | 52.2 | 21   |
| 125922 | Poland         | R1a-L260  | R-M458+ L260+            | 52.2 | 21   |
| N30169 | Poland         | R1a-L260  | R-M458+ L260+            | 52.2 | 21   |
| 85265  | Poland         | R1a-L260  | R-M458+ L260+            | 52.2 | 21   |
| 4623   | Poland         | R1a-L260  | R-M458+ L260+            | 52.2 | 21   |
| 22620  | Poland         | R1a-L260  | R-M458+ L260+            | 52.2 | 21   |
| N3662  | Poland         | R1a-L260  | R-M458+ L260+            | 52.2 | 21   |
| 11992  | Poland         | R1a-L260  | R-M458+ L260+            | 52.2 | 21   |
| 46336  | Poland         | R1a-L260  | R-M458+ L260+            | 52.2 | 21   |
| N18946 | Poland         | R1a-L260  | R-M458+ L260+            | 52.2 | 21   |

|          |              |            |                           |      |      |
|----------|--------------|------------|---------------------------|------|------|
| 172283   | Poland       | R1a-L260   | R-M458+ L260+             | 52.2 | 21   |
| 179688   | Poland       | R1a-L260   | R-M458+ L260+             | 52.2 | 21   |
| 209544   | Poland       | R1a-L260   | R-M458+ L260+             | 52.2 | 21   |
| 94796    | Poland       | R1a-L260   | R-M458+ L260+             | 52.2 | 21   |
| 86790    | Poland       | R1a-L260   | R-M458+ L260+             | 52.2 | 21   |
| N13715   | Poland       | R1a-L260   | R-M458+ L260+             | 52.2 | 21   |
| 152662   | Russia       | R1a-L260   | R-M458+ L260+             | 55.7 | 37.6 |
| 31553    | Russia       | R1a-L260   | R-M458+ L260+             | 55.7 | 37.6 |
| 185639   | Slovakia     | R1a-L260   | R-M458+ L260+             | 48.2 | 17.1 |
| 67728    | Slovakia     | R1a-L260   | R-M458+ L260+             | 48.2 | 17.1 |
| 31257    | Ukraine      | R1a-L260   | R-M458+ L260+             | 50.4 | 30.5 |
| 137778   | Germany      | R1a-L365+  | R-Z280+ L365+             | 52.5 | 13.4 |
| 71501    | Germany      | R1a-L365+  | R-Z280+ L365+             | 52.5 | 13.4 |
| N7393    | Germany      | R1a-L365+  | R-Z280+ L365+             | 52.5 | 13.4 |
| 88309    | Germany      | R1a-L365+  | R-Z280+ L365+             | 52.5 | 13.4 |
| N74814   | Poland       | R1a-L365+  | R-Z280+ L365+             | 52.2 | 21   |
| 165792   | Poland       | R1a-L365+  | R-Z280+ L365+             | 52.2 | 21   |
| 133745   | Poland       | R1a-L365+  | R-Z280+ L365+             | 52.2 | 21   |
| 57685    | Poland       | R1a-L365+  | R-Z280+ L365+             | 52.2 | 21   |
| E10118   | Poland       | R1a-L365+  | R-Z280+ L365+             | 52.2 | 21   |
| E9666    | Poland       | R1a-L365+  | R-Z280+ L365+             | 52.2 | 21   |
| 172020   | Poland       | R1a-L365+  | R-Z280+ L365+             | 52.2 | 21   |
| 23292    | Poland       | R1a-L365+  | R-Z280+ L365+             | 52.2 | 21   |
| N17352   | Poland       | R1a-L365+  | R-Z280+ L365+             | 52.2 | 21   |
| N2335    | Poland       | R1a-L365+  | R-Z280+ L365+             | 52.2 | 21   |
| 23291    | Poland       | R1a-L365+  | R-Z280+ L365+             | 52.2 | 21   |
| 12624    | Poland       | R1a-L365+  | R-Z280+ L365+             | 52.2 | 21   |
| N30766   | Ukraine      | R1a-L365+  | R-Z280+ L365+             | 50.4 | 30.5 |
| 7295     | Ukraine      | R1a-L365+  | R-Z280+ L365+             | 50.4 | 30.5 |
| N49600   | Germany      | R1a1-Z283* | R-Z283+ Z280- M458- Z284- | 52.5 | 13.4 |
| 160159   | Germany      | R1a1-Z283* | R-Z283+ Z280- M458- Z284- | 52.5 | 13.4 |
| 227082   | Germany      | R1a1-Z283* | R-Z283+ Z280- M458- Z284- | 52.5 | 13.4 |
| 201431   | Kuwait       | R1a1-Z283* | R-Z283+ Z280- M458- Z284- | 29.4 | 47.9 |
| 132838   | Poland       | R1a1-Z283* | R-Z283+ Z280- M458- Z284- | 52.2 | 21   |
| 44591    | Poland       | R1a1-Z283* | R-Z283+ Z280- M458- Z284- | 52.2 | 21   |
| M7258    | Saudi Arabia | R1a1-Z283* | R-Z283+ Z280- M458- Z284- | 24.6 | 46.7 |
| 232376   | Saudi Arabia | R1a1-Z283* | R-Z283+ Z280- M458- Z284- | 24.6 | 46.7 |
| 231554   | Saudi Arabia | R1a1-Z283* | R-Z283+ Z280- M458- Z284- | 24.6 | 46.7 |
| 131765   | Switzerland  | R1a1-Z283* | R-Z283+ Z280- M458- Z284- | 46.9 | 7.4  |
| 214352   | Turkey       | R1a1-Z283* | R-Z283+ Z280- M458- Z284- | 39.9 | 32.9 |
| 182305   | Turkey       | R1a1-Z283* | R-Z283+ Z280- M458- Z284- | 39.9 | 32.9 |
| N50360   | UK           | R1a1-Z283* | R-Z283+ Z280- M458- Z284- | 51.5 | 0.1  |
| 198114   | UK           | R1a1-Z283* | R-Z283+ Z280- M458- Z284- | 51.5 | 0.1  |
| 18130    | UK           | R1a1-Z283* | R-Z283+ Z280- M458- Z284- | 51.5 | 0.1  |
| 166219   | UK           | R1a1-Z283* | R-Z283+ Z280- M458- Z284- | 51.5 | 0.1  |
| 187138   | Ukraine      | R1a1-Z283* | R-Z283+ Z280- M458- Z284- | 50.4 | 30.5 |
| 107ASM12 | Afghanistan  | Q1b*Q1b1*  | Q-L275+ L245-             | 34.5 | 69.2 |
| N58043   | India        | Q1b*Q1b1*  | Q-L275+ L245-             | 21   | 78   |
| N19260   | India        | Q1b*Q1b1*  | Q-L275+ L245-             | 21   | 78   |
| 037ASM10 | India        | Q1b*Q1b1*  | Q-L275+ L245-             | 21   | 78   |
| 067ASM10 | India        | Q1b*Q1b1*  | Q-L275+ L245-             | 21   | 78   |
| N78873   | India        | Q1b*Q1b1*  | Q-L275+ L245-             | 21   | 78   |
| N39405   | India        | Q1b*Q1b1*  | Q-L275+ L245-             | 21   | 78   |
| 193005   | Kazakhstan   | Q1b*Q1b1*  | Q-L275+ L245-             | 51.2 | 71.4 |

|        |              |           |                         |      |      |
|--------|--------------|-----------|-------------------------|------|------|
| 210883 | Kazakhstan   | Q1b*Q1b1* | Q-L275+ L245-           | 51.2 | 71.4 |
| 224482 | Pakistan     | Q1b*Q1b1* | Q-L275+ L245-           | 33.7 | 73.2 |
| N29052 | Pakistan     | Q1b*Q1b1* | Q-L275+ L245-           | 33.7 | 73.2 |
| N14041 | Pakistan     | Q1b*Q1b1* | Q-L275+ L245-           | 33.7 | 73.2 |
| 53682  | Poland       | Q1b*Q1b1* | Q-L275+ L245-           | 52.2 | 21   |
| 13254  | Portugal     | Q1b*Q1b1* | Q-L275+ L245-           | 38.8 | -9.1 |
| 187028 | Germany      | Q1b*Q1b1* | Q-L275+ L245-           | 52.5 | 13.4 |
| 181179 | Russia       | Q1b*Q1b1* | Q-L275+ L245-           | 55.7 | 37.6 |
| 182771 | Russia       | Q1b*Q1b1* | Q-L275+ L245-           | 55.7 | 37.6 |
| 182773 | Russia       | Q1b*Q1b1* | Q-L275+ L245-           | 55.7 | 37.6 |
| 26360  | Uzbekhistan  | Q1b*Q1b1* | Q-L275+ L245-           | 41.3 | 69.2 |
| 174248 | Armenia      | J2a4b     | J-M67+ L210-            | 40.2 | 44.5 |
| 174250 | Armenia      | J2a4b     | J-M67+ L210-            | 40.2 | 44.5 |
| 176688 | Armenia      | J2a4b     | J-M67+ L210-            | 40.2 | 44.5 |
| 216529 | Georgia      | J2a4b     | J-M67+ L210-            | 41.7 | 44.8 |
| 31852  | Germany      | J2a4b     | J-M67+ L210-            | 52.5 | 13.4 |
| 139708 | Germany      | J2a4b     | J-M67+ L210-            | 52.5 | 13.4 |
| 168536 | Germany      | J2a4b     | J-M67+ L210-            | 52.5 | 13.4 |
| 70513  | Iraq         | J2a4b     | J-M67+ L210-            | 33.3 | 44.4 |
| B1300  | Ireland      | J2a4b     | J-M67+ L210-            | 53.3 | 6.3  |
| 149533 | Israel       | J2a4b     | J-M67+ L210-            | 33.4 | 35.5 |
| 18790  | Italy        | J2a4b     | J-M67+ L210-            | 41.9 | 12.5 |
| N89155 | Italy        | J2a4b     | J-M67+ L210-            | 41.9 | 12.5 |
| 103307 | Netherlands  | J2a4b     | J-M67+ L210-            | 52.4 | 4.9  |
| 159331 | Portugal     | J2a4b     | J-M67+ L210-            | 38.8 | -9.1 |
| 230305 | Russia       | J2a4b     | J-M67+ L210-            | 55.7 | 37.6 |
| N3620  | Sudan        | J2a4b     | J-M67+ L210-            | 15.6 | 32.5 |
| 198821 | Syria        | J2a4b     | J-M67+ L210-            | 33.5 | 36.3 |
| 164196 | Turkey       | J2a4b     | J-M67+ L210-            | 39.9 | 32.9 |
| 182262 | UK           | J2a4b     | J-M67+ L210-            | 51.5 | 0.1  |
| N38534 | UK           | J2a4b     | J-M67+ L210-            | 51.5 | 0.1  |
| N93584 | UK           | J2a4b     | J-M67+ L210-            | 51.5 | 0.1  |
| 166319 | Armenia      | R1b1*     | R-P25+ P297- M335- V88- | 40.2 | 44.5 |
| 181545 | Armenia      | R1b1*     | R-P25+ P297- M335- V88- | 40.2 | 44.5 |
| 165317 | Bahrain      | R1b1*     | R-P25+ P297- M335- V88- | 26.2 | 50.6 |
| N16605 | Belarus      | R1b1*     | R-P25+ P297- M335- V88- | 53.9 | 27.6 |
| 216826 | Georgia      | R1b1*     | R-P25+ P297- M335- V88- | 41.7 | 44.8 |
| 112962 | Germany      | R1b1*     | R-P25+ P297- M335- V88- | 52.5 | 13.4 |
| 97835  | Hungary      | R1b1*     | R-P25+ P297- M335- V88- | 47.4 | 19.2 |
| N93357 | India        | R1b1*     | R-P25+ P297- M335- V88- | 21   | 78   |
| N39156 | Iraq         | R1b1*     | R-P25+ P297- M335- V88- | 33.3 | 44.4 |
| N83832 | Italy        | R1b1*     | R-P25+ P297- M335- V88- | 41.9 | 12.5 |
| 34520  | Lithuania    | R1b1*     | R-P25+ P297- M335- V88- | 54.7 | 25.3 |
| N4337  | Poland       | R1b1*     | R-P25+ P297- M335- V88- | 52.2 | 21   |
| N2813  | Poland       | R1b1*     | R-P25+ P297- M335- V88- | 52.2 | 21   |
| 110387 | Russia       | R1b1*     | R-P25+ P297- M335- V88- | 55.7 | 37.6 |
| 170336 | Saudi Arabia | R1b1      | R-P25+ P297- M335- V88- | 24.6 | 46.7 |
| 160040 | Saudi Arabia | R1b1      | R-P25+ P297- M335- V88- | 24.6 | 46.7 |
| 48742  | Spain        | R1b1*     | R-P25+ P297- M335- V88- | 40.4 | -3.7 |
| N26020 | Spain        | R1b1*     | R-P25+ P297- M335- V88- | 40.4 | -3.7 |
| 161210 | Spain        | R1b1*     | R-P25+ P297- M335- V88- | 40.4 | -3.7 |
| 149191 | Turkey       | R1b1*     | R-P25+ P297- M335- V88- | 39.9 | 32.9 |
| 2372   | Turkey       | R1b1*     | R-P25+ P297- M335- V88- | 39.9 | 32.9 |
| 150748 | UK           | R1b1*     | R-P25+ P297- M335- V88- | 51.5 | 0.1  |

|         |                |            |                         |      |      |
|---------|----------------|------------|-------------------------|------|------|
| 57176   | Ukraine        | R1b1*      | R-P25+ P297- M335- V88- | 50.4 | 30.5 |
| 262     | Ukraine        | R1b1*      | R-P25+ P297- M335- V88- | 50.4 | 30.5 |
| 189402  | Uzbekistan     | R1b1*      | R-P25+ P297- M335- V88- | 41.3 | 69.2 |
| 134423  | Armenia        | R1b1a2*    | R-M269+ L23-            | 40.2 | 44.5 |
| 101029  | Belarus        | R1b1a2*    | R-M269+ L23-            | 53.9 | 27.6 |
| 163904  | Belarus        | R1b1a2*    | R-M269+ L23-            | 53.9 | 27.6 |
| N60445  | France         | R1b1a2*    | R-M269+ L23-            | 48.9 | 2.4  |
| N4522   | Germany        | R1b1a2*    | R-M269+ L23-            | 52.5 | 13.4 |
| QXGKN   | Italy          | R1b1a2*    | R-M269+ L23-            | 41.9 | 12.5 |
| 5VU5V   | Italy          | R1b1a2*    | R-M269+ L23-            | 41.9 | 12.5 |
| 46835   | Italy          | R1b1a2*    | R-M269+ L23-            | 41.9 | 12.5 |
| 170870  | Poland         | R1b1a2*    | R-M269+ L23-            | 52.2 | 21   |
| 169223  | Syria          | R1b1a2*    | R-M269+ L23-            | 33.5 | 36.3 |
| 131645  | Turkey         | R1b1a2*    | R-M269+ L23-            | 39.9 | 32.9 |
| 174259  | Turkey         | R1b1a2*    | R-M269+ L23-            | 39.9 | 32.9 |
| 2146    | Ukraine        | R1b1a2*    | R-M269+ L23-            | 50.4 | 30.5 |
| 158476  | Ukraine        | R1b1a2*    | R-M269+ L23-            | 50.4 | 30.5 |
| 126775  | Ukraine        | R1b1a2*    | R-M269+ L23-            | 50.4 | 30.5 |
| 177512  | UK             | R1b1a2*    | R-M269+ L23-            | 51.5 | 0.1  |
| 113425  | Levant         | R1b1a2*    | R-M269+ L23-            | 52.2 | 21   |
| 195750  | Armenia        | R1b1a2a1*  | R-L150+ L51-            | 40.2 | 44.5 |
| 149196  | Armenia        | R1b1a2a1*  | R-L150+ L51-            | 40.2 | 44.5 |
| 184381  | Armenia        | R1b1a2a1*  | R-L150+ L51-            | 40.2 | 44.5 |
| 54168   | Czech Republic | R1b1a2a1*  | R-L150+ L51-            | 50.1 | 14.5 |
| N76689  | Egypt          | R1b1a2a1*  | R-L150+ L51-            | 30.1 | 31.2 |
| 102551  | France         | R1b1a2a1*  | R-L150+ L51-            | 48.9 | 2.4  |
| 7PJJJ   | Germany        | R1b1a2a1*  | R-L150+ L51-            | 52.5 | 13.4 |
| 121597  | Hungary        | R1b1a2a1*  | R-L150+ L51-            | 47.4 | 19.2 |
| 5811    | Ireland        | R1b1a2a1*  | R-L150+ L51-            | 53.3 | 6.3  |
| 30885   | Italy          | R1b1a2a1*  | R-L150+ L51-            | 41.9 | 12.5 |
| E5276   | Italy          | R1b1a2a1*  | R-L150+ L51-            | 41.9 | 12.5 |
| 95875   | Italy          | R1b1a2a1*  | R-L150+ L51-            | 41.9 | 12.5 |
| 223828  | Kazakhstan     | R1b1a2a1*  | R-L150+ L51-            | 51.2 | 71.4 |
| 131176  | Lebanon        | R1b1a2a1*  | R-L150+ L51-            | 33.4 | 35.5 |
| N97723  | Lebanon        | R1b1a2a1*  | R-L150+ L51-            | 33.4 | 35.5 |
| 66841   | Lithuania      | R1b1a2a1*  | R-L150+ L51-            | 54.7 | 25.3 |
| N68231  | Poland         | R1b1a2a1*  | R-L150+ L51-            | 52.2 | 21   |
| 166563  | Poland         | R1b1a2a1*  | R-L150+ L51-            | 52.2 | 21   |
| 92187   | Poland         | R1b1a2a1*  | R-L150+ L51-            | 52.2 | 21   |
| N36978  | Poland         | R1b1a2a1*  | R-L150+ L51-            | 52.2 | 21   |
| 9-21793 | Poland         | R1b1a2a1*  | R-L150+ L51-            | 52.2 | 21   |
| N3622   | Spain          | R1b1a2a1*  | R-L150+ L51-            | 40.4 | -3.7 |
| 162059  | Turkey         | R1b1a2a1*  | R-L150+ L51-            | 39.9 | 32.9 |
| 185783  | Turkey         | R1b1a2a1*  | R-L150+ L51-            | 39.9 | 32.9 |
| 164229  | Turkey         | R1b1a2a1*  | R-L150+ L51-            | 39.9 | 32.9 |
| 34372   | UK             | R1b1a2a1*  | R-L150+ L51-            | 51.5 | 0.1  |
| 82745   | UK             | R1b1a2a1*  | R-L150+ L51-            | 51.5 | 0.1  |
| 26483   | UK             | R1b1a2a1*  | R-L150+ L51-            | 51.5 | 0.1  |
| 194313  | UK             | R1b1a2a1*  | R-L150+ L51-            | 51.5 | 0.1  |
| 95535   | UK             | R1b1a2a1*  | R-L150+ L51-            | 51.5 | 0.1  |
| 16910   | UK             | R1b1a2a1*  | R-L150+ L51-            | 51.5 | 0.1  |
| 64409   | UK             | R1b1a2a1*  | R-L150+ L51-            | 51.5 | 0.1  |
| W63WR   | Croatia        | R1b1a2a1a* | R-L51+ L11-             | 45.8 | 16   |
| 87-5845 | Germany        | R1b1a2a1a* | R-L51+ L11-             | 52.5 | 13.4 |

|        |             |             |              |      |      |
|--------|-------------|-------------|--------------|------|------|
| 134706 | Ireland     | R1b1a2a1a*  | R-L51+ L11-  | 53.3 | 6.3  |
| N5273  | Italy       | R1b1a2a1a*  | R-L51+ L11-  | 41.9 | 12.5 |
| 143613 | Netherlands | R1b1a2a1a*  | R-L51+ L11-  | 52.4 | 4.9  |
| 80001  | Poland      | R1b1a2a1a*  | R-L51+ L11-  | 52.2 | 21   |
| 80593  | Poland      | R1b1a2a1a*  | R-L51+ L11-  | 52.2 | 21   |
| E2689  | Spain       | R1b1a2a1a*  | R-L51+ L11-  | 40.4 | -3.7 |
| 46468  | Turkey      | R1b1a2a1a*  | R-L51+ L11-  | 39.9 | 32.9 |
| 132478 | UK          | R1b1a2a1a*  | R-L51+ L11-  | 51.5 | 0.1  |
| 49624  | UK          | R1b1a2a1a*  | R-L51+ L11-  | 51.5 | 0.1  |
| 111988 | UK          | R1b1a2a1a*  | R-L51+ L11-  | 51.5 | 0.1  |
| 97317  | UK          | R1b1a2a1a*  | R-L51+ L11-  | 51.5 | 0.1  |
| 41519  | UK          | R1b1a2a1a*  | R-L51+ L11-  | 51.5 | 0.1  |
| TAC7A  | Armenia     | R1b1a2a1a1* | R-L11+ U106- | 40.2 | 44.5 |
| UAWPH  | France      | R1b1a2a1a1* | R-L11+ U106- | 48.9 | 2.4  |
| 110855 | France      | R1b1a2a1a1* | R-L11+ U106- | 48.9 | 2.4  |
| N58749 | France      | R1b1a2a1a1* | R-L11+ U106- | 48.9 | 2.4  |
| 58927  | France      | R1b1a2a1a1* | R-L11+ U106- | 48.9 | 2.4  |
| 66573  | France      | R1b1a2a1a1* | R-L11+ U106- | 48.9 | 2.4  |
| 67632  | France      | R1b1a2a1a1* | R-L11+ U106- | 48.9 | 2.4  |
| 82681  | France      | R1b1a2a1a1* | R-L11+ U106- | 48.9 | 2.4  |
| 99994  | France      | R1b1a2a1a1* | R-L11+ U106- | 48.9 | 2.4  |
| 86866  | France      | R1b1a2a1a1* | R-L11+ U106- | 48.9 | 2.4  |
| N36241 | France      | R1b1a2a1a1* | R-L11+ U106- | 48.9 | 2.4  |
| 104128 | Germany     | R1b1a2a1a1* | R-L11+ U106- | 52.5 | 13.4 |
| N2197  | Germany     | R1b1a2a1a1* | R-L11+ U106- | 52.5 | 13.4 |
| 35677  | Germany     | R1b1a2a1a1* | R-L11+ U106- | 52.5 | 13.4 |
| 52652  | Germany     | R1b1a2a1a1* | R-L11+ U106- | 52.5 | 13.4 |
| P4XCW  | Germany     | R1b1a2a1a1* | R-L11+ U106- | 52.5 | 13.4 |
| N23935 | Germany     | R1b1a2a1a1* | R-L11+ U106- | 52.5 | 13.4 |
| N42297 | Germany     | R1b1a2a1a1* | R-L11+ U106- | 52.5 | 13.4 |
| N21533 | Germany     | R1b1a2a1a1* | R-L11+ U106- | 52.5 | 13.4 |
| N45541 | Germany     | R1b1a2a1a1* | R-L11+ U106- | 52.5 | 13.4 |
| N56105 | Ireland     | R1b1a2a1a1* | R-L11+ U106- | 53.3 | 6.3  |
| 47703  | Ireland     | R1b1a2a1a1* | R-L11+ U106- | 53.3 | 6.3  |
| 23171  | Ireland     | R1b1a2a1a1* | R-L11+ U106- | 53.3 | 6.3  |
| 7565   | Ireland     | R1b1a2a1a1* | R-L11+ U106- | 53.3 | 6.3  |
| 81633  | Ireland     | R1b1a2a1a1* | R-L11+ U106- | 53.3 | 6.3  |
| N41701 | Ireland     | R1b1a2a1a1* | R-L11+ U106- | 53.3 | 6.3  |
| N21843 | Ireland     | R1b1a2a1a1* | R-L11+ U106- | 53.3 | 6.3  |
| 42273  | Ireland     | R1b1a2a1a1* | R-L11+ U106- | 53.3 | 6.3  |
| 51491  | Ireland     | R1b1a2a1a1* | R-L11+ U106- | 53.3 | 6.3  |
| 101204 | Ireland     | R1b1a2a1a1* | R-L11+ U106- | 53.3 | 6.3  |
| 72665  | Ireland     | R1b1a2a1a1* | R-L11+ U106- | 53.3 | 6.3  |
| 84782  | Ireland     | R1b1a2a1a1* | R-L11+ U106- | 53.3 | 6.3  |
| 4PDJ4  | Ireland     | R1b1a2a1a1* | R-L11+ U106- | 53.3 | 6.3  |
| 63879  | Ireland     | R1b1a2a1a1* | R-L11+ U106- | 53.3 | 6.3  |
| N8583  | Ireland     | R1b1a2a1a1* | R-L11+ U106- | 53.3 | 6.3  |
| 21482  | Ireland     | R1b1a2a1a1* | R-L11+ U106- | 53.3 | 6.3  |
| 27818  | Ireland     | R1b1a2a1a1* | R-L11+ U106- | 53.3 | 6.3  |
| 47113  | Ireland     | R1b1a2a1a1* | R-L11+ U106- | 53.3 | 6.3  |
| 78183  | Ireland     | R1b1a2a1a1* | R-L11+ U106- | 53.3 | 6.3  |
| 45013  | Ireland     | R1b1a2a1a1* | R-L11+ U106- | 53.3 | 6.3  |
| 27539  | Ireland     | R1b1a2a1a1* | R-L11+ U106- | 53.3 | 6.3  |
| B38TQ  | Ireland     | R1b1a2a1a1* | R-L11+ U106- | 53.3 | 6.3  |



|        |             |             |              |      |      |
|--------|-------------|-------------|--------------|------|------|
| 2831   | Lithuania   | R1b1a2a1a1* | R-L11+ U106- | 54.7 | 25.3 |
| N28819 | Netherlands | R1b1a2a1a1* | R-L11+ U106- | 52.4 | 4.9  |
| N16822 | Netherlands | R1b1a2a1a1* | R-L11+ U106- | 52.4 | 4.9  |
| 6324   | Netherlands | R1b1a2a1a1* | R-L11+ U106- | 52.4 | 4.9  |
| 85208  | Netherlands | R1b1a2a1a1* | R-L11+ U106- | 52.4 | 4.9  |
| 4UGEK  | Poland      | R1b1a2a1a1* | R-L11+ U106- | 52.2 | 21   |
| AKBS5  | Poland      | R1b1a2a1a1* | R-L11+ U106- | 52.2 | 21   |
| 9UNCU  | Portugal    | R1b1a2a1a1* | R-L11+ U106- | 38.8 | -9.1 |
| N57279 | Portugal    | R1b1a2a1a1* | R-L11+ U106- | 38.8 | -9.1 |
| 76021  | Spain       | R1b1a2a1a1* | R-L11+ U106- | 40.4 | -3.7 |
| 78029  | Spain       | R1b1a2a1a1* | R-L11+ U106- | 40.4 | -3.7 |
| N44991 | Spain       | R1b1a2a1a1* | R-L11+ U106- | 40.4 | -3.7 |
| 46334  | Spain       | R1b1a2a1a1* | R-L11+ U106- | 40.4 | -3.7 |
| N7RUW  | Switzerland | R1b1a2a1a1* | R-L11+ U106- | 46.9 | 7.4  |
| 30635  | UK          | R1b1a2a1a1* | R-L11+ U106- | 51.5 | 0.1  |
| 37068  | UK          | R1b1a2a1a1* | R-L11+ U106- | 51.5 | 0.1  |
| 102517 | UK          | R1b1a2a1a1* | R-L11+ U106- | 51.5 | 0.1  |
| 51794  | UK          | R1b1a2a1a1* | R-L11+ U106- | 51.5 | 0.1  |
| N48878 | UK          | R1b1a2a1a1* | R-L11+ U106- | 51.5 | 0.1  |
| 26778  | UK          | R1b1a2a1a1* | R-L11+ U106- | 51.5 | 0.1  |
| 50278  | UK          | R1b1a2a1a1* | R-L11+ U106- | 51.5 | 0.1  |
| 84267  | UK          | R1b1a2a1a1* | R-L11+ U106- | 51.5 | 0.1  |
| 4W2GA  | UK          | R1b1a2a1a1* | R-L11+ U106- | 51.5 | 0.1  |
| S3THJ  | UK          | R1b1a2a1a1* | R-L11+ U106- | 51.5 | 0.1  |
| N11370 | UK          | R1b1a2a1a1* | R-L11+ U106- | 51.5 | 0.1  |
| YNWV9  | UK          | R1b1a2a1a1* | R-L11+ U106- | 51.5 | 0.1  |
| CYQ4N  | UK          | R1b1a2a1a1* | R-L11+ U106- | 51.5 | 0.1  |
| 58796  | UK          | R1b1a2a1a1* | R-L11+ U106- | 51.5 | 0.1  |
| N1848  | UK          | R1b1a2a1a1* | R-L11+ U106- | 51.5 | 0.1  |
| 15490  | UK          | R1b1a2a1a1* | R-L11+ U106- | 51.5 | 0.1  |
| 31137  | UK          | R1b1a2a1a1* | R-L11+ U106- | 51.5 | 0.1  |
| 16918  | UK          | R1b1a2a1a1* | R-L11+ U106- | 51.5 | 0.1  |
| 65860  | UK          | R1b1a2a1a1* | R-L11+ U106- | 51.5 | 0.1  |
| 66478  | UK          | R1b1a2a1a1* | R-L11+ U106- | 51.5 | 0.1  |
| 88684  | UK          | R1b1a2a1a1* | R-L11+ U106- | 51.5 | 0.1  |
| 3CR7S  | UK          | R1b1a2a1a1* | R-L11+ U106- | 51.5 | 0.1  |
| 49637  | UK          | R1b1a2a1a1* | R-L11+ U106- | 51.5 | 0.1  |
| N18664 | UK          | R1b1a2a1a1* | R-L11+ U106- | 51.5 | 0.1  |
| BYFNX  | UK          | R1b1a2a1a1* | R-L11+ U106- | 51.5 | 0.1  |
| 7467   | UK          | R1b1a2a1a1* | R-L11+ U106- | 51.5 | 0.1  |
| 28920  | UK          | R1b1a2a1a1* | R-L11+ U106- | 51.5 | 0.1  |
| 38087  | UK          | R1b1a2a1a1* | R-L11+ U106- | 51.5 | 0.1  |
| 79343  | UK          | R1b1a2a1a1* | R-L11+ U106- | 51.5 | 0.1  |
| N23712 | UK          | R1b1a2a1a1* | R-L11+ U106- | 51.5 | 0.1  |
| 38806  | UK          | R1b1a2a1a1* | R-L11+ U106- | 51.5 | 0.1  |
| 87278  | UK          | R1b1a2a1a1* | R-L11+ U106- | 51.5 | 0.1  |
| 31131  | UK          | R1b1a2a1a1* | R-L11+ U106- | 51.5 | 0.1  |
| KZ8MZ  | UK          | R1b1a2a1a1* | R-L11+ U106- | 51.5 | 0.1  |
| 54945  | UK          | R1b1a2a1a1* | R-L11+ U106- | 51.5 | 0.1  |
| N19218 | UK          | R1b1a2a1a1* | R-L11+ U106- | 51.5 | 0.1  |
| 36308  | UK          | R1b1a2a1a1* | R-L11+ U106- | 51.5 | 0.1  |
| N8721  | UK          | R1b1a2a1a1* | R-L11+ U106- | 51.5 | 0.1  |
| N1851  | UK          | R1b1a2a1a1* | R-L11+ U106- | 51.5 | 0.1  |
| WSUYD  | UK          | R1b1a2a1a1* | R-L11+ U106- | 51.5 | 0.1  |

|        |    |             |              |      |     |
|--------|----|-------------|--------------|------|-----|
| 41613  | UK | R1b1a2a1a1* | R-L11+ U106- | 51.5 | 0.1 |
| 72MZ2  | UK | R1b1a2a1a1* | R-L11+ U106- | 51.5 | 0.1 |
| N22147 | UK | R1b1a2a1a1* | R-L11+ U106- | 51.5 | 0.1 |
| 7AQZG  | UK | R1b1a2a1a1* | R-L11+ U106- | 51.5 | 0.1 |
| 73824  | UK | R1b1a2a1a1* | R-L11+ U106- | 51.5 | 0.1 |
| 60472  | UK | R1b1a2a1a1* | R-L11+ U106- | 51.5 | 0.1 |
| N3790  | UK | R1b1a2a1a1* | R-L11+ U106- | 51.5 | 0.1 |
| 38223  | UK | R1b1a2a1a1* | R-L11+ U106- | 51.5 | 0.1 |
| 59275  | UK | R1b1a2a1a1* | R-L11+ U106- | 51.5 | 0.1 |
| 39244  | UK | R1b1a2a1a1* | R-L11+ U106- | 51.5 | 0.1 |
| 47418  | UK | R1b1a2a1a1* | R-L11+ U106- | 51.5 | 0.1 |
| 2340   | UK | R1b1a2a1a1* | R-L11+ U106- | 51.5 | 0.1 |
| N12360 | UK | R1b1a2a1a1* | R-L11+ U106- | 51.5 | 0.1 |
| 102770 | UK | R1b1a2a1a1* | R-L11+ U106- | 51.5 | 0.1 |
| 101748 | UK | R1b1a2a1a1* | R-L11+ U106- | 51.5 | 0.1 |
| 26660  | UK | R1b1a2a1a1* | R-L11+ U106- | 51.5 | 0.1 |
| 7133   | UK | R1b1a2a1a1* | R-L11+ U106- | 51.5 | 0.1 |
| N17878 | UK | R1b1a2a1a1* | R-L11+ U106- | 51.5 | 0.1 |
| MFCEP  | UK | R1b1a2a1a1* | R-L11+ U106- | 51.5 | 0.1 |
| 90970  | UK | R1b1a2a1a1* | R-L11+ U106- | 51.5 | 0.1 |
| 32191  | UK | R1b1a2a1a1* | R-L11+ U106- | 51.5 | 0.1 |
| WZDQY  | UK | R1b1a2a1a1* | R-L11+ U106- | 51.5 | 0.1 |
| N22536 | UK | R1b1a2a1a1* | R-L11+ U106- | 51.5 | 0.1 |
| 65194  | UK | R1b1a2a1a1* | R-L11+ U106- | 51.5 | 0.1 |
| 77772  | UK | R1b1a2a1a1* | R-L11+ U106- | 51.5 | 0.1 |
| N3GH8  | UK | R1b1a2a1a1* | R-L11+ U106- | 51.5 | 0.1 |
| M4H58  | UK | R1b1a2a1a1* | R-L11+ U106- | 51.5 | 0.1 |
| 4H9SS  | UK | R1b1a2a1a1* | R-L11+ U106- | 51.5 | 0.1 |
| N8983  | UK | R1b1a2a1a1* | R-L11+ U106- | 51.5 | 0.1 |
| 21572  | UK | R1b1a2a1a1* | R-L11+ U106- | 51.5 | 0.1 |
| 37094  | UK | R1b1a2a1a1* | R-L11+ U106- | 51.5 | 0.1 |
| 86680  | UK | R1b1a2a1a1* | R-L11+ U106- | 51.5 | 0.1 |
| 86930  | UK | R1b1a2a1a1* | R-L11+ U106- | 51.5 | 0.1 |
| N3983  | UK | R1b1a2a1a1* | R-L11+ U106- | 51.5 | 0.1 |
| 2132   | UK | R1b1a2a1a1* | R-L11+ U106- | 51.5 | 0.1 |
| 82157  | UK | R1b1a2a1a1* | R-L11+ U106- | 51.5 | 0.1 |
| 12300  | UK | R1b1a2a1a1* | R-L11+ U106- | 51.5 | 0.1 |
| MXCHE  | UK | R1b1a2a1a1* | R-L11+ U106- | 51.5 | 0.1 |
| 96841  | UK | R1b1a2a1a1* | R-L11+ U106- | 51.5 | 0.1 |
| 13621  | UK | R1b1a2a1a1* | R-L11+ U106- | 51.5 | 0.1 |
| 19441  | UK | R1b1a2a1a1* | R-L11+ U106- | 51.5 | 0.1 |
| 8551   | UK | R1b1a2a1a1* | R-L11+ U106- | 51.5 | 0.1 |
| 24162  | UK | R1b1a2a1a1* | R-L11+ U106- | 51.5 | 0.1 |
| N28007 | UK | R1b1a2a1a1* | R-L11+ U106- | 51.5 | 0.1 |
| 5789   | UK | R1b1a2a1a1* | R-L11+ U106- | 51.5 | 0.1 |
| CSRF9  | UK | R1b1a2a1a1* | R-L11+ U106- | 51.5 | 0.1 |
| 112244 | UK | R1b1a2a1a1* | R-L11+ U106- | 51.5 | 0.1 |
| 63623  | UK | R1b1a2a1a1* | R-L11+ U106- | 51.5 | 0.1 |
| 9544   | UK | R1b1a2a1a1* | R-L11+ U106- | 51.5 | 0.1 |
| 62584  | UK | R1b1a2a1a1* | R-L11+ U106- | 51.5 | 0.1 |
| ADCAU  | UK | R1b1a2a1a1* | R-L11+ U106- | 51.5 | 0.1 |
| 77763  | UK | R1b1a2a1a1* | R-L11+ U106- | 51.5 | 0.1 |
| 28079  | UK | R1b1a2a1a1* | R-L11+ U106- | 51.5 | 0.1 |
| 48674  | UK | R1b1a2a1a1* | R-L11+ U106- | 51.5 | 0.1 |

|        |         |             |                     |      |      |
|--------|---------|-------------|---------------------|------|------|
| N16295 | UK      | R1b1a2a1a1* | R-L11+ U106-        | 51.5 | 0.1  |
| 16153  | UK      | R1b1a2a1a1* | R-L11+ U106-        | 51.5 | 0.1  |
| N40675 | UK      | R1b1a2a1a1* | R-L11+ U106-        | 51.5 | 0.1  |
| 30333  | UK      | R1b1a2a1a1* | R-L11+ U106-        | 51.5 | 0.1  |
| 36483  | UK      | R1b1a2a1a1* | R-L11+ U106-        | 51.5 | 0.1  |
| 75621  | UK      | R1b1a2a1a1* | R-L11+ U106-        | 51.5 | 0.1  |
| SXR68  | UK      | R1b1a2a1a1* | R-L11+ U106-        | 51.5 | 0.1  |
| 63671  | UK      | R1b1a2a1a1* | R-L11+ U106-        | 51.5 | 0.1  |
| 65048  | UK      | R1b1a2a1a1* | R-L11+ U106-        | 51.5 | 0.1  |
| N40156 | UK      | R1b1a2a1a1* | R-L11+ U106-        | 51.5 | 0.1  |
| 3Y65B  | UK      | R1b1a2a1a1* | R-L11+ U106-        | 51.5 | 0.1  |
| 152974 | Armenia | R1b1a2a1b   | R-L23+ L584+        | 40.2 | 44.5 |
| 164200 | Armenia | R1b1a2a1b   | R-L23+ L584+        | 40.2 | 44.5 |
| 182984 | Armenia | R1b1a2a1b   | R-L23+ L584+        | 40.2 | 44.5 |
| 195789 | Armenia | R1b1a2a1b   | R-L23+ L584+        | 40.2 | 44.5 |
| 7PJJJ  | Germany | R1b1a2a1b   | R-L23+ L584+        | 52.5 | 13.4 |
| 183824 | Iran    | R1b1a2a1b   | R-L23+ L584+        | 35.7 | 51.4 |
| 184027 | Iraq    | R1b1a2a1b   | R-L23+ L584+        | 33.3 | 44.4 |
| 205749 | Iraq    | R1b1a2a1b   | R-L23+ L584+        | 33.3 | 44.4 |
| 92187  | Poland  | R1b1a2a1b   | R-L23+ L584+        | 52.2 | 21   |
| 70052  | Syria   | R1b1a2a1b   | R-L23+ L584+        | 33.5 | 36.3 |
| 90492  | Turkey  | R1b1a2a1b   | R-L23+ L584+        | 39.9 | 32.9 |
| 162122 | Turkey  | R1b1a2a1b   | R-L23+ L584+        | 39.9 | 32.9 |
| 162122 | Turkey  | R1b1a2a1b   | R-L23+ L584+        | 39.9 | 32.9 |
| 166322 | Turkey  | R1b1a2a1b   | R-L23+ L584+        | 39.9 | 32.9 |
| 166323 | Turkey  | R1b1a2a1b   | R-L23+ L584+        | 39.9 | 32.9 |
| 178932 | Turkey  | R1b1a2a1b   | R-L23+ L584+        | 39.9 | 32.9 |
| 187550 | Turkey  | R1b1a2a1b   | R-L23+ L584+        | 39.9 | 32.9 |
| 191405 | Turkey  | R1b1a2a1b   | R-L23+ L584+        | 39.9 | 32.9 |
| 83298  | Armenia | R2a*        | R-M124+ L295- L294- | 40.2 | 44.5 |
| 152979 | Armenia | R2a*        | R-M124+ L295- L294- | 40.2 | 44.5 |
| 34064  | Belarus | R2a*        | R-M124+ L295- L294- | 53.9 | 27.6 |
| 202994 | Belarus | R2a*        | R-M124+ L295- L294- | 53.9 | 27.6 |
| N50322 | Belarus | R2a*        | R-M124+ L295- L294- | 53.9 | 27.6 |
| N76442 | Belarus | R2a*        | R-M124+ L295- L294- | 53.9 | 27.6 |
| 167022 | Germany | R2a*        | R-M124+ L295- L294- | 52.5 | 13.4 |
| 204954 | Germany | R2a*        | R-M124+ L295- L294- | 52.5 | 13.4 |
| N15680 | Hungary | R2a*        | R-M124+ L295- L294- | 47.4 | 19.2 |
| 47959  | India   | R2a*        | R-M124+ L295- L294- | 21   | 78   |
| 57968  | India   | R2a*        | R-M124+ L295- L294- | 21   | 78   |
| 79350  | India   | R2a*        | R-M124+ L295- L294- | 21   | 78   |
| 114482 | India   | R2a*        | R-M124+ L295- L294- | 21   | 78   |
| 173192 | India   | R2a*        | R-M124+ L295- L294- | 21   | 78   |
| 196275 | India   | R2a*        | R-M124+ L295- L294- | 21   | 78   |
| N13831 | India   | R2a*        | R-M124+ L295- L294- | 21   | 78   |
| N15633 | India   | R2a*        | R-M124+ L295- L294- | 21   | 78   |
| N48849 | India   | R2a*        | R-M124+ L295- L294- | 21   | 78   |
| N68553 | India   | R2a*        | R-M124+ L295- L294- | 21   | 78   |
| N98791 | India   | R2a*        | R-M124+ L295- L294- | 21   | 78   |
| 166326 | Iran    | R2a*        | R-M124+ L295- L294- | 35.7 | 51.4 |
| M5075  | Iran    | R2a*        | R-M124+ L295- L294- | 35.7 | 51.4 |
| M6716  | Iran    | R2a*        | R-M124+ L295- L294- | 35.7 | 51.4 |
| 74611  | Iran    | R2a*        | R-M124+ L295- L294- | 35.7 | 51.4 |
| N40042 | Iran    | R2a*        | R-M124+ L295- L294- | 35.7 | 51.4 |

|         |              |       |                     |      |      |
|---------|--------------|-------|---------------------|------|------|
| 166906  | Kazakhstan   | R2a*  | R-M124+ L295- L294- | 51.2 | 71.4 |
| 130681  | Kuwait       | R2a*  | R-M124+ L295- L294- | 29.4 | 47.9 |
| M6364   | Kuwait       | R2a*  | R-M124+ L295- L294- | 29.4 | 47.9 |
| M7063   | Kuwait       | R2a*  | R-M124+ L295- L294- | 29.4 | 47.9 |
| 7568    | Latvia       | R2a*  | R-M124+ L295- L294- | 56.9 | 24.1 |
| N66759  | Latvia       | R2a*  | R-M124+ L295- L294- | 56.9 | 24.1 |
| N36207  | Levant       | R2a*  | R-M124+ L295- L294- | 33.4 | 35.5 |
| N47925  | Levant       | R2a*  | R-M124+ L295- L294- | 33.4 | 35.5 |
| 65829   | Lithuania    | R2a*  | R-M124+ L295- L294- | 54.7 | 25.3 |
| 114900  | Lithuania    | R2a*  | R-M124+ L295- L294- | 54.7 | 25.3 |
| 133728  | Lithuania    | R2a*  | R-M124+ L295- L294- | 54.7 | 25.3 |
| 139187  | Lithuania    | R2a*  | R-M124+ L295- L294- | 54.7 | 25.3 |
| N89017  | Pakistan     | R2a*  | R-M124+ L295- L294- | 33.7 | 73.2 |
| 190496  | Qatar        | R2a*  | R-M124+ L295- L294- | 25.3 | 51.5 |
| M7361   | Qatar        | R2a*  | R-M124+ L295- L294- | 25.3 | 51.5 |
| 76213   | Russia       | R2a*  | R-M124+ L295- L294- | 55.7 | 37.6 |
| 77686   | Russia       | R2a*  | R-M124+ L295- L294- | 55.7 | 37.6 |
| 152883  | Russia       | R2a*  | R-M124+ L295- L294- | 55.7 | 37.6 |
| 168753  | Russia       | R2a*  | R-M124+ L295- L294- | 55.7 | 37.6 |
| N71654  | Russia       | R2a*  | R-M124+ L295- L294- | 55.7 | 37.6 |
| 226085  | Saudi Arabia | R2a*  | R-M124+ L295- L294- | 24.6 | 46.7 |
| M7355   | Saudi Arabia | R2a*  | R-M124+ L295- L294- | 24.6 | 46.7 |
| 177636  | Slovakia     | R2a*  | R-M124+ L295- L294- | 48.2 | 17.1 |
| 204790  | Sweden       | R2a*  | R-M124+ L295- L294- | 59.4 | 18.1 |
| N72507  | Switzerland  | R2a*  | R-M124+ L295- L294- | 46.9 | 7.4  |
| 69172   | Tunisia      | R2a*  | R-M124+ L295- L294- | 36.8 | 10.2 |
| 174252  | Turkey       | R2a*  | R-M124+ L295- L294- | 39.9 | 32.9 |
| 179132  | Turkey       | R2a*  | R-M124+ L295- L294- | 39.9 | 32.9 |
| M6609   | UAE          | R2a*  | R-M124+ L295- L294- | 24.5 | 54.4 |
| 175576  | UK           | R2a*  | R-M124+ L295- L294- | 51.5 | 0.1  |
| FXGT6   | Ukraine      | R2a*  | R-M124+ L295- L294- | 50.4 | 30.5 |
| 80336   | Ukraine      | R2a*  | R-M124+ L295- L294- | 50.4 | 30.5 |
| 173869  | Ukraine      | R2a*  | R-M124+ L295- L294- | 50.4 | 30.5 |
| N13866  | Ukraine      | R2a*  | R-M124+ L295- L294- | 50.4 | 30.5 |
| N32154  | Ukraine      | R2a*  | R-M124+ L295- L294- | 50.4 | 30.5 |
| N34756  | Ukraine      | R2a*  | R-M124+ L295- L294- | 50.4 | 30.5 |
| N47925  | Ukraine      | R2a*  | R-M124+ L295- L294- | 50.4 | 30.5 |
| N65466  | Ukraine      | R2a*  | R-M124+ L295- L294- | 50.4 | 30.5 |
| 210978  | Yemen        | R2a*  | R-M124+ L295- L294- | 15.3 | 44.2 |
| 41130   | Yemen        | R2a*  | R-M124+ L295- L294- | 15.3 | 44.2 |
| 35521   | India        | R2a1a | R-M124+ L295+ L294- | 21   | 78   |
| 70778   | India        | R2a1a | R-M124+ L295+ L294- | 21   | 78   |
| 218123  | India        | R2a1a | R-M124+ L295+ L294- | 21   | 78   |
| E5825   | India        | R2a1a | R-M124+ L295+ L294- | 21   | 78   |
| N101460 | India        | R2a1a | R-M124+ L295+ L294- | 21   | 78   |
| N102097 | India        | R2a1a | R-M124+ L295+ L294- | 21   | 78   |
| N13638  | India        | R2a1a | R-M124+ L295+ L294- | 21   | 78   |
| N15633  | India        | R2a1a | R-M124+ L295+ L294- | 21   | 78   |
| N54928  | India        | R2a1a | R-M124+ L295+ L294- | 21   | 78   |
| N56907  | India        | R2a1a | R-M124+ L295+ L294- | 21   | 78   |
| N73992  | India        | R2a1a | R-M124+ L295+ L294- | 21   | 78   |
| N74077  | India        | R2a1a | R-M124+ L295+ L294- | 21   | 78   |
| N77183  | India        | R2a1a | R-M124+ L295+ L294- | 21   | 78   |
| N99821  | India        | R2a1a | R-M124+ L295+ L294- | 21   | 78   |

|         |              |       |                     |      |      |
|---------|--------------|-------|---------------------|------|------|
| N81759  | India        | R2a1a | R-M124+ L295+ L294- | 21   | 78   |
| 213291  | India        | R2a1a | R-M124+ L295+ L294- | 21   | 78   |
| E11827  | India        | R2a1a | R-M124+ L295+ L294- | 21   | 78   |
| N100325 | India        | R2a1a | R-M124+ L295+ L294- | 21   | 78   |
| N13647  | India        | R2a1a | R-M124+ L295+ L294- | 21   | 78   |
| N20326  | India        | R2a1a | R-M124+ L295+ L294- | 21   | 78   |
| N20744  | India        | R2a1a | R-M124+ L295+ L294- | 21   | 78   |
| N37067  | India        | R2a1a | R-M124+ L295+ L294- | 21   | 78   |
| N38706  | India        | R2a1a | R-M124+ L295+ L294- | 21   | 78   |
| N55174  | India        | R2a1a | R-M124+ L295+ L294- | 21   | 78   |
| N55951  | India        | R2a1a | R-M124+ L295+ L294- | 21   | 78   |
| N58062  | India        | R2a1a | R-M124+ L295+ L294- | 21   | 78   |
| N74520  | India        | R2a1a | R-M124+ L295+ L294- | 21   | 78   |
| N91873  | India        | R2a1a | R-M124+ L295+ L294- | 21   | 78   |
| N96545  | India        | R2a1a | R-M124+ L295+ L294- | 21   | 78   |
| 234700  | Iraq         | R2a1a | R-M124+ L295+ L294- | 33.3 | 44.4 |
| 20461   | Italy        | R2a1a | R-M124+ L295+ L294- | 41.9 | 12.5 |
| 69059   | Pakistan     | R2a1a | R-M124+ L295+ L294- | 33.7 | 73.2 |
| 202218  | Qatar        | R2a1a | R-M124+ L295+ L294- | 25.3 | 51.5 |
| 175653  | Saudi Arabia | R2a1a | R-M124+ L295+ L294- | 24.6 | 46.7 |
| 235768  | Saudi Arabia | R2a1a | R-M124+ L295+ L294- | 24.6 | 46.7 |
| 239090  | Saudi Arabia | R2a1a | R-M124+ L295+ L294- | 24.6 | 46.7 |
| M5040   | Saudi Arabia | R2a1a | R-M124+ L295+ L294- | 24.6 | 46.7 |
| 168983  | Syria        | R2a1a | R-M124+ L295+ L294- | 33.5 | 36.3 |
| M5098   | UAE          | R2a1a | R-M124+ L295+ L294- | 24.5 | 54.4 |
| 114870  | UK           | R2a1a | R-M124+ L295+ L294- | 51.5 | 0.1  |

Table S11. **Fellow traveller haplogroups:** Transcaucasia to India. Marker incidence above the 2% threshold was plotted for each population sample.

| <b>Community / Region</b> | <b><i>n</i></b> | <b>REFERENCE</b> |
|---------------------------|-----------------|------------------|
| Abkhaz                    | 58              | 1.9.2.           |
| Afro-Iranian              | 12              | 1.9.3.           |
| Agharia                   | 10              | 1.9.6            |
| Assyrian (Azarbaijan)     | 39              | 1.9.3.           |
| Avars                     | 115             | 1.9.2.           |
| Azeri                     | 63              | 1.9.3.           |
| Bactria                   | 23              | 1.9.5            |
| Balochi                   | 25              | 1.9.6            |
| Begram                    | 19              | 1.9.5            |
| Brahui                    | 25              | 1.9.6            |
| Burusho                   | 20              | 1.9.6            |
| Chechens (Chechnya)       | 118             | 1.9.2.           |
| Chechens (Dagestan)       | 100             | 1.9.2.           |
| Chechens (Ingushetia)     | 112             | 1.9.2.           |
| Circassians               | 142             | 1.9.2.           |
| Dargins                   | 101             | 1.9.2.           |
| Fars Persian              | 44              | 1.9.3.           |
| Gheshmi                   | 49              | 1.9.3.           |
| Gilan Gilak               | 64              | 1.9.3.           |
| Golestan Turkmen          | 68              | 1.9.3.           |
| Hazara Afghan             | 60              | 1.9.4            |
| Hormozgan Bandari         | 131             | 1.9.3.           |
| Ingush                    | 143             | 1.9.2.           |
| Iraq                      | 203             | 1.9.1.           |
| Isfahan Persian           | 11              | 1.9.3.           |
| Iyengar                   | 30              | 1.9.6            |
| Iyer                      | 29              | 1.9.6            |
| Jalalabad-Laghman         | 40              | 1.9.5            |
| Jordan                    | 146             | 1.9.1.           |
| Kaitak                    | 33              | 1.9.2.           |
| Kalash                    | 20              | 1.9.6            |
| Khatri                    | 29              | This work        |
| Khorasan Persian          | 59              | 1.9.3.           |
| Khuzestan Arab            | 57              | 1.9.3.           |
| Konkanastha               | 25              | 1.9.6            |
| Kubachi                   | 65              | 1.9.2.           |
| Kurdestan Kurd            | 59              | 1.9.3.           |
| Lezghins                  | 80              | 1.9.2.           |
| Lorestan Lur              | 50              | 1.9.3.           |

|                    |     |           |
|--------------------|-----|-----------|
| Makrani            | 20  | 1.9.6     |
| Maratha            | 20  | 1.9.6     |
| Mazandarani        | 72  | 1.9.3.    |
| Nuristan-Kunar     | 15  | 1.9.5     |
| Oman               | 121 | 1.9.1.    |
| Ossets-Digor       | 127 | 1.9.2.    |
| Ossets-Iron        | 230 | 1.9.2.    |
| Paktia             | 13  | 1.9.5     |
| Pallan             | 29  | 1.9.6     |
| Pashtun Afghan     | 49  | 1.9.4     |
| Pathan             | 21  | 1.9.6     |
| Qandahar-Herat     | 19  | 1.9.5     |
| Qatar              | 72  | 1.9.1.    |
| Rajput             | 29  | 1.9.6     |
| Saraswat           | 35  | This work |
| Saudi Arabia       | 157 | 1.9.1.    |
| Shapsug            | 100 | 1.9.2.    |
| Sindhi             | 29  | 1.9.6     |
| Sistan Baluch      | 24  | 1.9.3.    |
| Tajik Afghan       | 56  | 1.9.4     |
| Tehran Armenian    | 34  | 1.9.3.    |
| Tehran Assyrian    | 9   | 1.9.3.    |
| Tehran Zoroastrian | 13  | 1.9.3.    |
| UAE                | 164 | 1.9.1.    |
| UP Brahmins        | 14  | 1.9.6     |
| Vanniyar           | 25  | 1.9.6     |
| Yazd Persian       | 46  | 1.9.3.    |
| Yazd Zoroastrian   | 34  | 1.9.3.    |
| Yemen              | 62  | 1.9.1.    |

## References:

- 1.9.1. Abu-Amero et al
- 1.9.2. Balanovsky O, Dibirova K, Dybo A, Mudrak O, Frolova S, Pocheshkhova E, Haber M, Platt D, Schurr T, Haak W, Kuznetsova M, Radzhabov M, Balaganskaya O, Romanov A, Zakharova T, Soria Hernanz DF, Zalloua P, Koshel S, Ruhlen M, Renfrew C, Wells RS, Tyler-Smith C, Balanovska E; Genographic Consortium. (2011) Parallel evolution of genes and languages in the Caucasus region. *Mol Biol Evol.* 28(10): 2905-2920.
- 1.9.3. Grugni V, Battaglia V, Hooshiar Kashani B, Parolo S, Al-Zahery N, Achilli A, Olivieri A, Gandini F, Houshmand M, Sanati MH, Torroni A, Semino O. (2012) Ancient migratory events in the Middle East: new clues from the Y-chromosome variation of modern Iranians. *PLoS One.* 7(7): e41252.
- 1.9.4. Haber M, Platt DE, Ashrafian Bonab M, Youhanna SC, Soria-Hernanz DF, Martínez-Cruz B, Douaihy B, Ghassibe-Sabbagh M, Rafatpanah H, Ghanbari M, Whale J, Balanovsky O, Wells RS, Comas D, Tyler-Smith C, Zalloua PA; Genographic Consortium. (2012) Afghanistan's ethnic groups share a Y-chromosomal heritage structured by historical events. *PLoS One.* 7(3): e34288.
- 1.9.5. Lacau H, Gayden T, Regueiro M, Chennakrishnaiah S, Bukhari A, Underhill PA, Garcia-Bertrand RL, Herrera RJ. (2012) Afghanistan from a Y-chromosome perspective. *Eur J Hum Genet.* 20(10): 1063-1070.
- 1.9.6. Sengupta S, Zhivotovsky LA, King R, Mehdi SQ, Edmonds CA, Chow CE, Lin AA, Mitra M, Sil SK, Ramesh A, Usha Rani MV, Thakur CM, Cavalli-Sforza LL, Majumder PP, Underhill PA. (2006) Polarity and temporality of high-

resolution y-chromosome distributions in India identify both indigenous and exogenous expansions and reveal minor genetic influence of Central Asian pastoralists. *Am J Hum Genet.* 78(2): 202-221.



File S12. **STR drift: Transcaucasia to India.** Mean-minus-mode values were plotted for 5 STRs selected from a small common subset of STRs analyzed across all regions. The other STRs were omitted either because there was no significant variance in repeat number or because the STR locus was bidirectionally hypervariable (see Methods). TC=Transcaucasia; AF=Afghanistan; IE=India (Eastern Region).

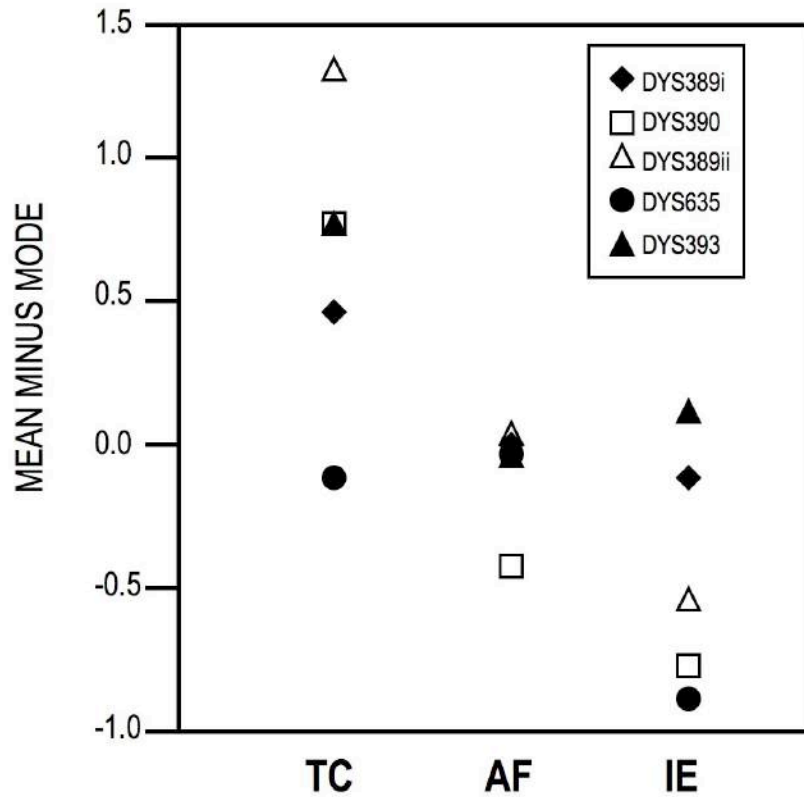

Table S13. WP-BRW findspots

| Town          | State       | N     | E     | Layer         | Arch Rev# | Date      |
|---------------|-------------|-------|-------|---------------|-----------|-----------|
| Lothal        | Gujarat     | 22.52 | 72.25 | pre-Period II | *         | 2000-1700 |
| Desalpur      | Gujarat     | 23.2  | 69.44 | I-B           | *         | 2000-1700 |
| Surkotada     | Gujarat     | 23.12 | 70.83 | I-B/C         | *         | 2000-1700 |
| Shikarपुर     | Gujarat     | 23.27 | 70.68 | post-Harappan | 1987-1988 | 2000-1700 |
| Bagasra       | Gujarat     | 21.29 | 70.57 | post-Harappan | 1999-2000 | 2000-1700 |
| Rojdi         | Gujarat     | 22.25 | 70.69 | Period C?     | *         | 2000-1700 |
| Nagwada       | Gujarat     | 23.33 | 71.68 | post-Harappan | 1985-1986 | 2000-1700 |
| Rangpur       | Gujarat     | 22.43 | 71.92 | I-C-III; IIB  | *         | 2000-1700 |
| Ojyana        | Rajasthan   | 25.88 | 74.35 | Period I      | 1999-2000 | 1900-1600 |
| Ahar          | Rajasthan   | 24.58 | 73.72 | I-A           | *         | 1900-1600 |
| Balathal      | Rajasthan   | 24.72 | 73.98 | Chalcolithic  | 1993-1994 | 1900-1600 |
| Gilund        | Rajasthan   | 25.02 | 74.25 |               | *         | 1900-1600 |
| Kotra         | MP          | 22.95 | 76.05 | Period IA     | 1988-1989 | 1600-1200 |
| Chichali      | MP          | 22.13 | 75.40 | Period I      | 1997-1998 | 1600-1200 |
| Dangawada     | MP          | 23.05 | 76.10 | Period II     | **        | 1600-1200 |
| Maheshwar     | MP          | 22.19 | 75.59 |               | *         | 1600-1200 |
| Eran          | MP          | 24.10 | 78.16 | Period IA     | 1987-1988 | 1600-1200 |
| Navdatoli     | MP          | 22.18 | 75.60 | Phase I       | *         | 1600-1200 |
| Awra          | MP          | 24.12 | 75.10 |               | *         | 1600-1200 |
| Prakash       | Maharashtra | 21.50 | 74.35 | Period I      | ***       | 1600-1200 |
| Imlidih Khurd | UP          | 26.55 | 83.21 | Period II     | 1991-1992 | 1200-1000 |
| Noh           | Rajasthan   | 27.22 | 77.50 |               | *         | 1200-1000 |
| Kheradih      | UP          | 25.76 | 84.15 | Period I      | 1981-1982 | 1200-1000 |
| Narhan        | UP          | 26.76 | 83.37 | Period I      | 1984-1985 | 1200-1000 |
| Siswania      | UP          | 26.75 | 82.77 | Period I      | 1995-1996 | 1200-1000 |
| Bhunadih      | UP          | 25.76 | 84.15 |               | 1993-1994 | 1200-1000 |
| Adam          | Maharashtra | 21.30 | 79.72 | Period II     | 1989-1990 | 1200-1000 |
| Chirand       | Bihar       | 25.75 | 84.83 | PdII          | *         | 1200-1000 |
| Dihar         | W. Bengal   | 23.12 | 87.35 | Period I      | 1993-1994 | 1200-1000 |
| Hallur        | Karnataka   | 14.33 | 75.62 |               | *         | 1200-1000 |
| Hemmige       | Karnataka   | 12.47 | 76.08 | Pd II         | *         | 1200-1000 |
| Maski         | Karnataka   | 15.97 | 76.65 |               | *         | 1200-1000 |
| Sanganakallu  | Karnataka   | 15.15 | 76.93 | megalithic    | *         | 1200-1000 |
| Tekkalakotta  | Karnataka   | 15.49 | 76.87 | Phase II      | *         | 1200-1000 |

# Indian Archeological Review Issue Date

## by radiocarbon dating (calibrated BCE)

\*Ghosh A (1991) Encyclopedia of Indian Archaeology. Brill Academic Publishers, Leiden, Netherlands.

\*\*Madhya Pradesh Archeological Directory

\*\*\*Archeological Survey of India

Table S14. **Copper Hoard findspots.** Locations shown in bold type are the locations where WP-BRW finds have also been reported.

| <b>ID</b> | <b>Location</b> |
|-----------|-----------------|
| 1         | Aguibani        |
| 2         | <b>Ahar</b>     |
| 3         | Akhuldoba       |
| 4         | Amroha          |
| 5         | Andhari         |
| 6         | Bagor           |
| 7         | Bahadarabad     |
| 8         | Baharia         |
| 9         | Balpur          |
| 10        | Bamanghati      |
| 11        | Bandua          |
| 12        | Bargaon         |
| 13        | Bardangua       |
| 14        | Bareilly        |
| 15        | Barrajpur       |
| 16        | Bartola         |
| 17        | Bhagada         |
| 18        | Bhaktabundh     |
| 19        | Bhiwani         |
| 20        | Bisauli         |
| 21        | Bithur          |
| 22        | Brahmagiri      |
| 23        | <b>Chandoli</b> |
| 24        | Chansar         |
| 25        | Chatla          |
| 26        | <b>Chirand</b>  |
| 27        | Dadari          |
| 28        | Daimabad        |
| 29        | Dargama         |
| 30        | Debakia         |
| 31        | Deoti           |
| 32        | Dhaka           |
| 33        | Dimiria         |
| 34        | Ekalsimgha      |
| 35        | Elana           |
| 36        | Eran            |
| 37        | Etawah          |
| 38        | Fathgarh        |
| 39        | Gandhauri       |
| 40        | Ganeshwar       |
| 41        | Ghangharia      |
| 42        | Hallur          |
| 43        | Hami            |
| 44        | Hansi           |
| 45        | Hardi           |

46 Harra Chowra Darh  
47 Inamgaon  
48 Indilapur  
49 Jabalpur  
50 **Jajmau**  
51 Jamboni  
52 Jokha  
53 Jorwe  
54 Kallur  
55 Kamalpur  
56 Kamdara  
57 Kankasa  
58 Karharbari  
59 Katmandu Valley  
60 Kayatha  
61 Kesli  
62 Kesna  
63 Khera Manpur  
64 Kindhaulia  
65 Kiratpur  
66 **Kausambi**  
67 Kota  
68 Kulgara  
69 Kulhade-ka-Johade  
70 Kurada  
71 Kushaya  
72 Lal Qila  
73 Langnaj  
74 **Lothal**  
75 Ludurapada  
76 Madnapur  
77 Mahisadal  
78 Mahuadanr  
79 Mainpuri  
80 Mallah  
81 Maski  
82 Mathura  
83 Mitathal  
84 Moongalaar  
86 Nagar  
87 Nakrahiya  
88 Nandlalpura  
89 Nankom  
90 Narnaod  
91 Narsimhapur  
92 Nasirpur  
93 Navdatoli  
94 Nevasa  
95 Niorai

|     |                   |
|-----|-------------------|
| 96  | Pandu Rajar Dhibi |
| 97  | Pariar            |
| 98  | Parihati          |
| 99  | Pauli             |
| 100 | Perua             |
| 101 | Piklihal          |
| 102 | Pind              |
| 103 | Pondi             |
| 104 | Prakash           |
| 105 | Rajpur Parsu      |
| 106 | Ramapuram         |
| 107 | Ramjipura         |
| 108 | Rangpur           |
| 109 | Resgavaon         |
| 110 | Rewari            |
| 111 | Sabania           |
| 112 | Saguni            |
| 113 | Saipai Lichchwal  |
| 114 | Sanchan Kot       |
| 115 | Sandhay           |
| 116 | <b>Sanghol</b>    |
| 117 | Sankarjang        |
| 118 | Sarthauli         |
| 119 | Sastevadi         |
| 120 | Shahabad          |
| 121 | Shavinipatti      |
| 122 | Sheorajpur        |
| 123 | Somnath           |
| 124 | <b>Sonepur</b>    |
| 125 | Tamajuri          |
| 126 | Taradih           |
| 127 | Tekkalakota       |
| 128 | Terdal            |
| 129 | Viratgarh         |

REFERENCES:

1. Yule P (1985) *Metalwork of the Bronze Age in India*. Oscar Beck, Munich.

2. Yule P (1992) The Copper Hoards Of The Indian Subcontinent. *Jahrbuch des Römisch-Germanischen Zentralmuseums Mainz* 36: 193–275.

Table S15. Channel-spouted bowl findspots.

| Location              | State       | N     | E     | Period  | References      |
|-----------------------|-------------|-------|-------|---------|-----------------|
| Nagarjunakonda        | AP          | 16.57 | 79.31 |         | Ghosh           |
| Rangpur               | Gujarat     | 22.43 | 71.92 |         | Ghosh           |
| Lothal                | Gujarat     | 22.52 | 72.25 |         | Ghosh           |
| Surkotada             | Gujarat     | 23.63 | 70.84 |         | Ghosh           |
| Piklihal              | Karnataka   | 15.96 | 76.45 | IA-IB   | Sankalia, Ghosh |
| Hemmige               | Karnataka   | 12.36 | 76.08 | II      | Ghosh           |
| T. Narsipur           | Karnataka   | 12.21 | 76.91 | I-II    | Sankalia, Ghosh |
| Sanganakallu          | Karnataka   | 15.18 | 76.97 |         | Ghosh           |
| Brahmagiri            | Karnataka   | 14.00 | 76.50 | IB      | Ghosh           |
| Chandoli              | Maharashtra | 19.17 | 73.97 | Layer 2 | Ghosh           |
| Daimabad              | Maharashtra | 19.52 | 74.70 |         | Sankalia        |
| Nevasa                | Maharashtra | 19.57 | 74.90 |         | Sankalia        |
| Navdatoli (Maheshwar) | MP          | 22.18 | 75.60 | III-IV  | Sankalia, Ghosh |
| Eran                  | MP          | 24.08 | 78.17 | I       | Sankalia        |
| Panihar (Gupteshwar)  | MP          | 26.09 | 78.01 | II      | Ghosh           |
| Ahar                  | Rajasthan   | 24.58 | 73.72 |         | Ghosh           |
| Gilund                | Rajasthan   | 25.02 | 74.25 |         | Sankalia        |
| Khurdi-Parbatsar      | Rajasthan   | 26.89 | 74.77 |         | Sankalia, Ghosh |

REFERENCES:

1. Ghosh A (1991) Encyclopedia of Indian Archaeology. Brill Academic Publishers, Leiden, Netherlands.
2. Sankalia HD (1963) New Light on the Indo-Iranian or Western Asiatic Relations between 1700 B.C.-1200 B.C. *Artibus Asiae* 26(3-4): 312-332.

**Table S16. Votive tanks findspots**

| Location               | State       | N     | E     |
|------------------------|-------------|-------|-------|
| Ahar (Aghata)          | Rajasthan   | 27.70 | 75.63 |
| Ahichchatra            | UP          | 28.37 | 79.12 |
| Arikamedu              | TN          | 11.92 | 79.83 |
| Ayodhya                | UP          | 26.80 | 82.20 |
| Bairat                 | Rajasthan   | 27.45 | 76.20 |
| Bateswar               | ??          | 26.93 | 78.70 |
| Besnagar (Vidisha)     | MP          | 23.53 | 77.82 |
| Bhita (Allahabad)      | UP          | 25.45 | 81.85 |
| Bhokardan              | Maharashtra | 20.27 | 75.77 |
| Chandoli (Sangli)      | Maharashtra | 16.87 | 74.57 |
| Chirand                | Bihar       | 25.75 | 84.80 |
| Devnimori              | Gujarat     | 23.67 | 73.35 |
| Hastinapur             | UP          | 29.15 | 78.05 |
| Jajmau (Yayatimau)     | UP          | 26.47 | 80.35 |
| Kaundinyapura          | Maharashtra | 22.92 | 78.10 |
| Kausambi               | UP          | 25.33 | 81.38 |
| Kolhapur (Brahmapuri)  | Maharashtra | 16.70 | 74.23 |
| Maheshwar (Mahishmati) | MP          | 22.18 | 75.60 |
| Masaon                 | UP          | 25.17 | 82.42 |
| Mathura                | UP          | 27.52 | 77.23 |
| Nagari (Madhyamika)    | Rajasthan   | 24.90 | 74.63 |
| Nagarjunakonda         | TN          | 16.52 | 79.23 |
| Nala Sopara            | Maharashtra | 19.42 | 72.86 |
| Navdatoli              | MP          | 22.18 | 75.60 |
| Nevasa                 | Maharashtra | 19.57 | 74.90 |
| Noh (Bharatpur)        | Rajasthan   | 27.22 | 77.48 |
| Paunar (Pravarapura)   | Maharashtra | 20.79 | 78.68 |
| Purana Qila            | Haryana     | 28.63 | 77.20 |
| Rairh (Tonk District)  | Rajasthan   | 26.33 | 76.17 |
| Rajghat (Gorakhpur)    | UP          | 26.76 | 83.37 |
| Rajgir (Rajagriha)     | Bihar       | 25.02 | 85.50 |
| Rangamaharal           | Rajasthan   | 29.35 | 73.95 |
| Sambhar (Sakambhari)   | Rajasthan   | 26.92 | 75.20 |
| Sanghol                | Punjab      | 30.78 | 76.38 |
| Shamlaji               | Gujarat     | 23.69 | 73.39 |
| Sonepur                | Bihar       | 25.70 | 85.18 |
| Sonkh                  | UP          | 27.50 | 77.47 |
| Taxila (Sirkap)        | Punjab      | 33.75 | 72.79 |
| Ter (Tagara)           | Maharashtra | 18.32 | 76.21 |
| Ujjain                 | MP          | 23.19 | 75.78 |

\* 18/40 (45%) of findspots are associated with Jaina Tirthas or religious centers; by comparison, only 6/81 (7.5%) of other contemporary archeological sites on the Indian sub-continent are associated with Jaina Tirthas or centers. The relative co-incidence of Buddhist centers is 6/40 (15%) and 12/81 (14.9%) respectively.

Table S17. **Toponym table.** God/epic hero (word-stem) toponyms were scored for each of the 20 largest states, corrected for relative incidence.

| <b>RELATIVE INCIDENCE OF GOD TOPONYMS</b><br>(BY MAJOR STATE, RELATIVE TO NATIONAL AVERAGE) |                         |                        |               |                |                          |                 |                        |
|---------------------------------------------------------------------------------------------|-------------------------|------------------------|---------------|----------------|--------------------------|-----------------|------------------------|
|                                                                                             | <b>MITRA<br/>VARUNA</b> | <b>OTHER<br/>VEDIC</b> | <b>GANESH</b> | <b>SHIVA</b>   | <b>LAXMI<br/>NARAYAN</b> | <b>RAMAYANA</b> | <b>(MAHA)<br/>BALI</b> |
|                                                                                             | <i>(n=73)</i>           | <i>(n=49)</i>          | <i>(n=56)</i> | <i>(n=414)</i> | <i>(n=263)</i>           | <i>(n=216)</i>  | <i>(n=217)</i>         |
| Andhra Pradesh                                                                              |                         |                        |               | 1.32           |                          |                 |                        |
| Assam                                                                                       |                         |                        |               |                |                          |                 | 14.64                  |
| Bihar                                                                                       |                         |                        |               |                | 1.89                     | 2.04            |                        |
| Chattisgarh                                                                                 |                         |                        |               |                | 1.12                     | 1.69            |                        |
| Gujarat                                                                                     | 4.49                    | 1.77                   | 3.89          | 1.52           | 1.40                     |                 |                        |
| Haryana                                                                                     |                         |                        |               |                | 1.53                     |                 | 1.86                   |
| Himachal Pradesh                                                                            |                         |                        |               |                |                          |                 | 2.75                   |
| Jammu & Kashmir                                                                             |                         |                        |               |                |                          |                 |                        |
| Jharkhand                                                                                   |                         |                        |               |                | 2.01                     | 1.97            | 2.98                   |
| Karnataka                                                                                   |                         |                        |               | 1.76           |                          |                 |                        |
| Kerala                                                                                      |                         |                        |               |                |                          |                 |                        |
| Madhya Pradesh                                                                              |                         | 1.58                   | 1.54          |                |                          | 1.70            |                        |
| Maharashtra                                                                                 |                         |                        | 2.22          | 2.22           |                          |                 |                        |
| Orissa                                                                                      | 1.15                    |                        |               |                | 1.69                     | 1.36            | 6.16                   |
| Punjab                                                                                      |                         |                        |               |                |                          |                 | 1.84                   |
| Rajasthan                                                                                   | 2.07                    |                        | 3.45          |                |                          | 1.93            |                        |
| Tamilnadu                                                                                   | 1.20                    |                        |               |                |                          |                 |                        |
| Uttar Pradesh                                                                               | 1.30                    |                        | 1.68          |                |                          | 1.39            |                        |
| Uttarakhand                                                                                 |                         |                        |               |                |                          |                 |                        |
| West Bengal                                                                                 |                         |                        |               |                | 1.40                     | 2.06            | 1.7                    |



Table S18. **Harappan seal styles.** Tabulation of seals with animal motifs (available online October 2012).

|                                                  |                 | <b>RELATIVE INCIDENCE OF ANIMAL MOTIFS</b> |                      |                     |                      |                       |                         |
|--------------------------------------------------|-----------------|--------------------------------------------|----------------------|---------------------|----------------------|-----------------------|-------------------------|
| <b><i>FINDSPOT</i></b><br><b><i>(REGION)</i></b> | <b><i>n</i></b> | <b><i>UNICORN</i></b>                      | <b><i>CAPRID</i></b> | <b><i>BOVID</i></b> | <b><i>OTHER*</i></b> | <b><i>HYBRIDS</i></b> | <b><i>UNCLASSIF</i></b> |
| SOTHI SISWAL                                     | 26              | 38.5                                       | 7.7                  | 7.7                 | 34.6                 | 7.7                   | 3.8                     |
| HARAPPA                                          | 33              | 75.8                                       | 0.0                  | 6.1                 | 12.1                 | 0.0                   | 6.1                     |
| MOHENJODARO                                      | 113             | 70.8                                       | 2.7                  | 4.4                 | 17.7                 | 2.7                   | 1.8                     |
| SOUTHERN SINDH                                   | 20              | 42.1                                       | 31.6                 | 10.5                | 10.5                 | 5.3                   | 0.0                     |
| SORATH                                           | 13              | 46.2                                       | 7.7                  | 15.4                | 0.0                  | 30.8                  | 0.0                     |
| PCT. SUN-CIRCLE**                                |                 | 3.9                                        | 100.0                | 0.0                 | 0.0                  | 90.0                  | n.d.                    |

\*elephant, tiger, rhino, sambhar

\*\*co-occurrence of dot-circle sun symbol

Table S19. **Tribal coins: Northwest region.** Percent occurrence of symbols on tribal coins of NW region of subcontinent during the interregnum between Mauryan and Gupta empires (200 BCE-300 CE). WEST= Gandhara, W. Punjab, 4 tribes, 8 coin series; EAST= Himachal Pradesh region, 4 tribes, 10 coin series; SOUTH= Haryana, Rajasthan, Malwa, 8 tribes, 27 coin series; south region inscriptions are in Brahmi only, but in other regions inscriptions are in both Brahmi and Kharoshti; \*\*auspicious symbols (ashtamangalas) in the Svetambara Jain tradition but not in the Buddhist or Hindu traditions; #associated with kings whose names are in the Shaiva tradition — always on the Brahmi side of coins.

| <b>SYMBOL</b>      | <b>WEST</b> | <b>EAST</b> | <b>SOUTH</b> |
|--------------------|-------------|-------------|--------------|
| ---Ujjain symbol   | 0.0         | 0.0         | <b>21.7</b>  |
| ---Tree-in-Railing | 0.0         | 10.0        | <b>82.6</b>  |
| ---Indradhvaja     | 0.0         | <b>40.0</b> | 0.0          |
| ---Swastika**      | 25.0        | <b>70.0</b> | 0.0          |
| ---Srivatsa**      | 25.0        | <b>40.0</b> | 0.0          |
| ---Trisula #       | <b>62.5</b> | 30.0        | 0.0          |

Reference: Handa D. "Tribal Coins of Ancient India" Aryan Books, New Delhi, 2007.

Table S20. Coins of the Indo-Persian borderlands. Early historical period.

| King (Indo-Greek)        | Date        | Location    | OBVERSE SYMBOLS               | REVERSE SYMBOLS                    |
|--------------------------|-------------|-------------|-------------------------------|------------------------------------|
| Pantaleon                | 190-180 BCE | Arachosii   | Female deity, flower          | Lion                               |
| Antimachos I             | 185-170 BCE | Arachosii   | Bust of king                  | Poseidon w/ trident                |
| Apollodotos I            | 180-160 BCE | Gandareii   | Elephant                      | Humped Bull                        |
| Apollodotos I            | 180-160 BCE | Gandareii   | Elephant, sun, kur-star/river | Humped bull, taurine               |
| Apollodotos I            | 180-160 BCE | Gandareii   | Elephant                      | Humped Bull                        |
| Apollodotos I            | 180-160 BCE | Gandareii   | Apollo, bow, arrow            | tripod                             |
| Demetrios II             | 175-140 BCE | Arachosii   | King                          | Athena, spear, shield              |
| Antimachos II Nikephoros | 160-155 BCE | Gandareii   | Nike, palm, fillet            | King on horse                      |
| Eucratides I             | 170-145 BCE | Gandareii   | King (horn bull helmet)       | Dioscuri (mounted), palm, spear    |
| Eucratides I             | 170-145 BCE | Gandareii   | King (crested helmet)         | Dioscuri, palms & pilei            |
| Eucratides I             | 170-145 BCE | Gandareii   | King (crested helmet)         | Dioscuri (mounted), palm, spear    |
| Eucratides I             | 170-145 BCE | Gandareii   | King (crested helmet)         | Dioscuri (mounted), palm & spear   |
| Eucratides II            | 170-145 BCE | Gandareii   | King                          | Apollo, bow, arrow                 |
| Heliocles I              | 145-130 BCE | Bactria     | King                          | Zeus, thunderbolt & scepter        |
| Heliocles I (posthumous) | 145-130 BCE | Bactria     | King                          | Horse                              |
| Menander I Soter         | 155-130 BCE | Gandareii-E | Athena (helmet)               | Owl                                |
| Menander I Soter         | 155-130 BCE | Gandareii-E | King, spear                   | Athena, thunderbolt & shield       |
| Menander I Soter         | 155-130 BCE | Gandareii-E | King, spear                   | Athena, thunderbolt & shield       |
| Menander I Soter         | 155-130 BCE | Gandareii-E | King, spear                   | Athena Alkidemos, shield           |
| Menander I Soter         | 155-130 BCE | Gandareii-E | King, spear                   | Athena Alkidemos, shield           |
| Menander I Soter         | 155-130 BCE | Gandareii-E | King, spear                   | Athena, thunderbolt & shield       |
| Menander I Soter         | 155-130 BCE | Gandareii-E | King (cr. Helmet), spear      | Athena, thunderbolt & shield       |
| Menander I Soter         | 155-130 BCE | Gandareii-E | King (cr. Helmet), spear      | Athena, thunderbolt & shield       |
| Menander I Soter         | 155-130 BCE | Gandareii-E | Athena (helmet)               | Winged Nike, wreath, palm          |
| Zoilos I                 | 130-20 BCE  | Arachosii   | King                          | Heracles, crowned, club, lion skin |
| Zoilos I                 | 130-20 BCE  | Arachosii   | King                          | Heracles, crowned, club, lion skin |
| Zoilos I                 | 130-20 BCE  | Arachosii   | Heracles w/ lions skin        | Club, bow, wreath                  |
| Strato I                 | 120-110 BCE | W. Punjab   | King                          | Athena, thunderbolt & shield       |
| Lysias                   | 120-110 BCE | Arachosii   | King (helmet) spear, elephant | Heracles, crowned, club, lion skin |
| Lysias                   | 120-110 BCE | Arachosii   | King (helmet) spear, elephant | Heracles, crowned, club, lion skin |
| Antialcidas              | 110-100 BCE | Arachosii   | King                          | Zeus, scepter & palm, tiny Nike    |
| Antialcidas              | 110-100 BCE | Arachosii   | King (helmet)                 | Zeus, scepter & palm, tiny Nike    |
| Antialcidas              | 110-100 BCE | Arachosii   | King (helmet)                 | Zeus, scepter & palm, tiny Nike    |
| Antialcidas              | 110-100 BCE | Arachosii   | Zeus, thunderbolt             | Dioscuri, palm, pilei              |
| Heliocles II             | 110-100     | Punjab - W  | King                          | Zeus, scepter & thunderbolt        |
| Philoxenos               | 100-95 BCE  | Gandareii   | King                          | King (helmet) on horse             |
| Philoxenos               | 100-95 BCE  | Gandareii   | King (helmet)                 | King (helmet) on horse             |
| Amyntas                  | 95-90 BCE   | Gandareii   | King (helmet) spear           | Zeus, scepter & palm, tiny Athena  |
| Archebios                | 90-70 BCE   | Punjab -W   | King                          | Zeus, scepter & thunderbolt        |
| Archebios                | 90-70 BCE   | Punjab -W   | King (helmet)                 | Zeus, scepter & thunderbolt        |
| Hermaios & Calliope      | 90-70 BCE   | Begram      | Kings                         | King (helmet) on horse             |
| Hermaios                 | 90-70 BCE   | Begram      | King                          | Zeus, scepter                      |
| Hermaios                 | 90-70 BCE   | Begram      | King (helmet)                 | Zeus, scepter                      |
| Hermaios                 | 90-70 BCE   | Begram      | King (helmet)                 | Zeus, scepter                      |
| Hermaios (posthumous)    | 90-70 BCE   | Begram      | King                          | Zeus, scepter                      |
| Hermaios (posthumous)    | 90-70 BCE   | Begram      | King                          | Zeus, scepter                      |
| Hermaios (posthumous)    | 90-70 BCE   | Begram      | King                          | Zeus, scepter                      |

|                       |           |        |                           |                             |
|-----------------------|-----------|--------|---------------------------|-----------------------------|
| Hermaios (posthumous) | 90-70 BCE | Begram | King                      | Zeus, scepter               |
| Hermaios (posthumous) | 90-70 BCE | Begram | King                      | Zeus, scepter               |
| Hermaios (posthumous) | 90-70 BCE | Begram | King                      | Zeus, scepter               |
| Hermaios (posthumous) | 90-70 BCE | Begram | King                      | Zeus, scepter               |
| Hermaios (posthumous) | 90-70 BCE | Begram | King                      | Zeus, scepter               |
| Apollodotus II        | 75-70 BCE | Punjab | King                      | Athena, shield, thunderbolt |
| Apollodotus II        | 75-70 BCE | Punjab | King                      | Athena, shield, thunderbolt |
| Apollodotus II        | 75-70 BCE | Punjab | Apollo, quiver, arrow, GK | Tripod                      |
| Zoilos II             | 55-35 BCE | Punjab | King                      | Athena, shield, thunderbolt |
| Strato II             | 25-10 BCE | Punjab | King                      | Athena, shield, thunderbolt |

| King (Indo-Scythian)           | Date      | Location | Series OBV                 | Series REV                  |
|--------------------------------|-----------|----------|----------------------------|-----------------------------|
| Maues                          | 85-60 BCE | Gandhara | Elephant, bull             | Caduceus                    |
| Maues                          | 85-60 BCE | Gandhara | Zeus, thunderbolt, trident | Goddess, vines              |
| Maues                          | 85-60 BCE | Gandhara | Elephant                   | King, sword                 |
| Vonones / Spalahores           | 75-65 BCE | unknown  | King on horse, spear       | Zeus, scepter, thunderbolt  |
| Vonones / Spalagadames         | 75-50 BCE | unknown  | King on horse, spear       | Zeus, scepter, thunderbolt  |
| Spalirises / Spalagadames      | 60-50 BCE | unknown  | King on horse              | Heracles, club              |
| Spalirises / Spalagadames      | 60-50 BCE | unknown  | King, battle axe, bow      | Zeus radiate, gesture       |
| Azes I                         | 60-20 BCE | Gandhara | King on horse, spear       | Zeus, scepter, thunderbolt  |
| Azes I                         | 60-20 BCE | Gandhara | King on horse, spear       | Zeus, scepter, thunderbolt  |
| Azes I                         | 60-20 BCE | Gandhara | King on horse, spear       | Zeus, scepter, thunderbolt  |
| Azes I                         | 60-20 BCE | Gandhara | King on horse, spear       | Goddess, palm, lamp         |
| Azes I                         | 60-20 BCE | Gandhara | King on horse, spear       | Athena, shield, thunderbolt |
| Azes I                         | 60-20 BCE | Gandhara | King on horse, spear       | Humped bull                 |
| Azes I                         | 60-20 BCE | Gandhara | Poseidon, trident          | Goddess, vines              |
| Azilises                       | 70-60 BCE | Gandhara | King on horse, spear       | Goddess, palm, lamp         |
| Azilises                       | 70-60 BCE | Gandhara | King on horse, spear       | Goddess, palm, lamp         |
| Azilises                       | 70-60 BCE | Gandhara | King on horse, spear       | Athena, shield, thunderbolt |
| Azes II                        | 60-20 BCE | Gandhara | King on horse, whip        | Poseidon, trident           |
| Azes II                        | 60-20 BCE | Gandhara | King on horse, whip        | Zeus, w. Nike, scepter      |
| Azes II                        | 60-20 BCE | Gandhara | King on horse, whip        | Zeus, w. Nike, scepter      |
| Azes II                        | 60-20 BCE | Gandhara | King on horse, whip        | Zeus, w. Nike, scepter      |
| Azes II                        | 60-20 BCE | Gandhara | King on horse, whip        | Zeus, w. Nike, scepter      |
| Azes II                        | 60-20 BCE | Gandhara | King on horse, whip        | Athena, spear, shield       |
| Azes II                        | 60-20 BCE | Gandhara | King on horse, whip        | Athena, spear, shield       |
| Azes II                        | 60-20 BCE | Gandhara | King on horse, whip        | Athena, spear, shield       |
| Azes II                        | 60-20 BCE | Gandhara | King on horse, whip        | Athena, spear, shield       |
| Azes II                        | 60-20 BCE | Gandhara | King on horse, whip        | Athena, spear, shield       |
| Azes II                        | 60-20 BCE | Gandhara | goddess, cornucopia        | Hermes, caduceus            |
| Azes II                        | 60-20 BCE | Gandhara | Humped bull                | Lion                        |
| Azes II                        | 60-20 BCE | Gandhara | Humped bull                | Lion                        |
| Azes II (Malakand)             | 60-20 BCE | Gandhara | King on horse, whip        | Zeus, w. Nike, scepter      |
| Azes II (Malakand)             | 60-20 BCE | Gandhara | King on horse, whip        | Athena, spear, shield       |
| Azes II / Aspavarma (Malakand) | 15-45 CE  | Bajaur   | King on horse, whip        | Athena, spear, shield       |

| King (Indo-Parthian) | Date             | Location        | Series OBV                  | Series REV           |
|----------------------|------------------|-----------------|-----------------------------|----------------------|
| Gondophares          | 20 BCE -early CE | Arachosia-Gandh | King on horse, Nike, wreath | Shiva, trident, palm |
| Gondophares          | 20 BCE -early CE | Arachosia-Gandh | King on horse, gesture      | Shiva, trident, palm |

|             |                  |                 |                        |                        |
|-------------|------------------|-----------------|------------------------|------------------------|
| Gondophares | 20 BCE -early CE | Arachosia-Gandh | King on horse, gesture | Athena, spear, shield  |
| Gondophares | 20 BCE -early CE | Arachosia-Gandh | King on horse, gesture | Zeus, gesture, scepter |
| Gondophares | 20 BCE -early CE | Arachosia-Gandh | King on horse, gesture | Athena, spear, shield  |
| Abdagases   | 50-65 CE         | Arachosia       | King on horse, gesture | Zeus, gesture, scepter |
| Abdagases   | 50-65 CE         | Arachosia       | King on horse, gesture | Zeus, gesture, scepter |
| Abdagases   | 50-65 CE         | Arachosia       | King on horse, gesture | Zeus, w. Nike, scepter |
| Abdagases   | 50-65 CE         | Arachosia       | King on horse, gesture | Zeus, gesture, scepter |

Source: Smithsonian Collection.

Tally of above series:

|                  | <i>Series</i> | <i>Heracles/Balarama-Lion</i> | <i>Trident (Shiva)*</i> | <i>Humped Bull</i> |
|------------------|---------------|-------------------------------|-------------------------|--------------------|
| <b>Arachosii</b> | <b>22</b>     | <b>7</b>                      | <b>2</b>                | <b>0</b>           |
| <b>Gandareii</b> | <b>52</b>     | <b>0</b>                      | <b>0</b>                | <b>6</b>           |
| <b>Punjab</b>    | <b>9</b>      | <b>1</b>                      | <b>0</b>                | <b>0</b>           |
| <b>Begram</b>    | <b>12</b>     | <b>0</b>                      | <b>0</b>                | <b>0</b>           |
| <b>Bactria</b>   | <b>2</b>      | <b>0</b>                      | <b>0</b>                | <b>0</b>           |
| <b>Other</b>     | <b>6</b>      | <b>1</b>                      | <b>0</b>                | <b>0</b>           |
| <b>Total</b>     | <b>103</b>    | <b>9</b>                      | <b>2</b>                | <b>6</b>           |

\* *not Poseidon*

Table S21. **Word-stem incidence in ancient texts.** The oldest books of the Rigveda (books 2-7), Atharvaveda, Ramayana (books 2-6) and four Puranas (Vayu, Vishnu, Matsya, Linga) were used for scoring the incidence of god/hero word stems.

WORD STEM INCIDENCE PER 1000 WORDS

|             |      | <b>Rigveda<br/>(Books 2-7)</b> | <b>Atharvaveda</b>  | <b>Ramayana<br/>(Books 2-6)</b> | <b>Puranas (4)</b> |
|-------------|------|--------------------------------|---------------------|---------------------------------|--------------------|
|             |      | <i>Est. 1200 BCE</i>           | <i>Est. 900 BCE</i> | <i>Est. 400 BCE</i>             | <i>Est. 600 CE</i> |
| Group ^     | n    | 121668                         | 160488              | 307509                          | 211488             |
| MITRAVARUNA | 2124 | 3.90 ± 0.63*                   | 1.67 ± 0.38         | 0.03 ± 0.06                     | 0.32 ± 0.27        |
| RAMAYANA    | 4234 | 0.01 ± 0.01                    | 0.01 ± 0.02         | 4.11 ± 0.03**                   | 0.07 ± 0.02        |
| PURANIC     | 1517 | 0.22 ± 0.31                    | 0.23 ± 0.32         | 0.06 ± 0.09                     | 4.91 ± 1.49        |

^ Mitrarvaruna group: Mitra, Varuna, Surya, Sarasvati; Ramayana group: Rama, Sita, Raghu, Lakshman;  
Puranic group: Shiva, Vishnu;

\* p<0.05 \*\* p<0.01 (vs other groups);

Table S22. Harappan symbols on seals

| RELATIVE GEOGRAPHICAL INCIDENCE |             |               |             |                |              |              |
|---------------------------------|-------------|---------------|-------------|----------------|--------------|--------------|
| <i>Icon</i>                     | <b>FISH</b> | <b>SUN</b>    | <b>FIRE</b> | <b>TRIDENT</b> | <b>PIPAL</b> | <b>CROWN</b> |
| <i>Wells symbol</i>             | 112-152     | 342, 354, 389 | 390-411     | 262            | 253-261      | 263, 265     |
| <i>n</i>                        | <b>812</b>  | <b>133</b>    | <b>120</b>  | <b>116</b>     | <b>42</b>    | <b>122</b>   |
| <i>Significance</i>             | Fertility   | Sun           | Fire        | Ishkur         | Goddess      | Horned god   |
| <b>Sothi-Siswal</b>             | <b>0.77</b> | <b>1.02</b>   | <b>0.91</b> | <b>0.47</b>    | <b>0.65</b>  | <b>0.00</b>  |
| <b>Harappa</b>                  | <b>0.93</b> | <b>0.70</b>   | <b>0.80</b> | <b>0.66</b>    | <b>1.02</b>  | <b>1.84</b>  |
| <b>Mohenjodaro</b>              | <b>1.05</b> | <b>1.10</b>   | <b>0.99</b> | <b>1.09</b>    | <b>0.95</b>  | <b>0.73</b>  |
| <b>S. Sindh</b>                 | <b>0.97</b> | <b>1.63</b>   | <b>1.13</b> | <b>2.58</b>    | <b>2.59</b>  | <b>0.00</b>  |
| <b>Sorath</b>                   | <b>1.00</b> | <b>1.19</b>   | <b>2.31</b> | <b>1.19</b>    | <b>0.47</b>  | <b>0.49</b>  |

Total number of signs tabulated =7,121 (Wells, 1998);

Table S23. Tripitaka census table

| <i>Place</i>  | <i>Modern Names</i> | <i>N</i> | <i>E</i> | <i>Page*</i> |
|---------------|---------------------|----------|----------|--------------|
| Agni          | Karasahr            | 42.01    | 86.55    | 21           |
| Ahicchattra   | Ramnagar, Bareilly  | 28.37    | 79.12    | 135          |
| Anandapura    | Vadnagar            | 23.79    | 72.64    | 343          |
| Andarab       | Baghlan, Bactria    | 35.60    | 68.68    | 359          |
| Andhra        | Pedavegi            | 16.77    | 81.10    | 313          |
| Atali         | Atali               | 22.01    | 72.86    | 341          |
| Audumbatira   | Kaccheswara         | 23.70    | 68.53    | 348          |
| Avanda        | Bahmana (Mansura)   | 25.88    | 68.77    | 351          |
| Ayamukha      | Ghazipur            | 25.58    | 83.57    | 155          |
| Ayodhya       | Faizabad            | 26.80    | 82.20    | 152          |
| Badakshan     | Badakshan (mid)     | 38.00    | 71.00    | 362          |
| Baghlan       | Baghlan             | 36.13    | 68.70    | 34           |
| Baktra        | Mazari Sharif       | 36.77    | 66.87    | 34           |
| Baluka        | Aksu                | 41.17    | 80.25    | 25           |
| Bamiana       | Bamyan              | 34.82    | 67.82    | 37           |
| Baranasi      | Varanasi            | 25.28    | 82.96    | 195          |
| Bharukacchapa | Bharuch             | 21.70    | 72.97    | 337          |
| Bukhara       | Bukhara             | 39.77    | 64.43    | 30           |
| Campa         | Bhagalpur           | 25.25    | 87.00    | 296          |
| Cinabhukti    | Chiniot             | 31.72    | 72.97    | 118          |
| Cola          | Thanjavur           | 10.77    | 79.13    | 318          |
| Darada        | Gilgit              | 35.92    | 74.28    | 92           |
| Dhanakataka   | Dharanikota         | 16.58    | 80.31    | 315          |
| Dharmasthiti  | Fayzabad? Khamdadh  | 37.12    | 70.58    | 363          |
| Dravida       | Kanchipuram         | 12.82    | 79.71    | 319          |
| Feihan        | Ferghana            | 40.38    | 71.79    | 28           |
| Gandhara      | Peshawar            | 34.02    | 71.58    | 70           |
| Govisana      | Kashipur, UK        | 29.22    | 78.95    | 134          |
| Gurjara       | Bhinmal             | 25.00    | 72.25    | 344          |
| Himatala      | Darayim?            | 36.92    | 70.38    | 362          |
| Horismika     | Khwarezm            | 41.38    | 60.37    | 31           |
| Huoh          | Kunduz              | 36.73    | 68.87    | 360          |
| Jaguda        | Hexina (Ghazni)     | 33.55    | 68.42    | 357          |
| Jalamdhara    | Jalandhar           | 31.21    | 75.57    | 120          |



|                  |                     |       |       |     |
|------------------|---------------------|-------|-------|-----|
| Kajangala        | Kajangala           | 25.03 | 87.84 | 297 |
| Kalinga          | Bhubaneshwar        | 20.27 | 85.84 | 306 |
| Kamarupa         | Guwahati            | 26.19 | 91.73 | 299 |
| Kanyakubja       | Kannauj             | 27.07 | 79.92 | 139 |
| Kapilavastu      | Lumbini             | 27.47 | 83.28 | 173 |
| Kapisi           | Kabul               | 34.53 | 69.17 | 39  |
| Kapitha          | Sankasya            | 27.52 | 82.05 | 136 |
| Karnasuvarna     | Karnasubarna        | 24.02 | 88.18 | 303 |
| Kasanna          | Shahrisabz          | 39.05 | 66.83 | 31  |
| Kasmira          | Srinagar            | 34.08 | 74.78 | 100 |
| Kausambi         | Kausambi            | 25.34 | 81.39 | 159 |
| Khulm            | Kholm               | 36.68 | 67.68 | 34  |
| Khutalan         | Khatlon             | 37.83 | 69.00 | 33  |
| Kongoda          | Ganjam              | 19.38 | 85.07 | 306 |
| Konkanapura      | Banavasi            | 14.53 | 75.02 | 334 |
| Kosala (south)   | Raipur              | 21.14 | 81.38 | 307 |
| Kuci             | Kucha               | 41.65 | 84.90 | 22  |
| Kuluta           | Naggur, Kullu       | 32.12 | 77.17 | 120 |
| Kusinagara       | Kushinagar          | 26.74 | 83.89 | 185 |
| Lampa            | Bagram              | 34.97 | 69.28 | 47  |
| Langala          | Sthuliswara         | 21.88 | 71.73 | 349 |
| Magadha          | Pataliputra         | 25.61 | 85.14 | 221 |
| Maharashtra      | Paithan on Godavari | 19.48 | 75.38 | 335 |
| Maheshvarapura   | Mahishmati          | 22.11 | 75.35 | 345 |
| Malakuta         | Kanyakumari         | 8.08  | 77.54 | 321 |
| Malava (S. Lata) | Kheda (Kaira)       | 22.75 | 72.68 | 338 |
| Mathura          | Mathura             | 27.49 | 77.67 | 122 |
| Matipura         | Mandawar            | 29.50 | 78.13 | 128 |
| Mimohe           | Panjakent           | 39.50 | 67.62 | 30  |
| Mulasthanapura   | Multan              | 30.19 | 71.47 | 347 |
| Mungan           | Takhar Province     | 36.70 | 69.80 | 361 |
| Nagarahara       | Jalalabad           | 34.43 | 70.44 | 65  |
| Nujkend          | Shymkent            | 42.32 | 69.59 | 28  |
| Parnotsa         | Poonch              | 33.77 | 74.10 | 110 |
| Parvata          | Faisalabad          | 31.42 | 73.07 | 347 |
| Patasila         | Hyderabad           | 25.37 | 68.37 | 350 |
| Prayaga          | Allahabad           | 25.45 | 81.85 | 156 |

|                |                    |       |       |     |
|----------------|--------------------|-------|-------|-----|
| Pundravardhana | Mahasthangarh      | 24.96 | 89.33 | 298 |
| Puskaravati    | Charsadda          | 34.80 | 71.43 | 77  |
| Sahaniyan      | Surkhan            | 37.74 | 67.52 | 32  |
| Samarkand      | Samarkand          | 39.65 | 66.96 | 29  |
| Samatata       | Narsingdi          | 23.92 | 90.73 | 301 |
| Satadru        | Ludhiana           | 30.91 | 75.85 | 121 |
| Shash          | Tashkent           | 41.27 | 69.22 | 28  |
| Shuman         | Dushanbe           | 38.54 | 68.78 | 33  |
| Sravasti       | Shravasti          | 27.52 | 82.05 | 165 |
| Srughna        | Saharanpur         | 29.96 | 77.55 | 126 |
| Sthaneswara    | Thanesar           | 29.97 | 76.84 | 124 |
| Surattha       | Surat, Kathiawad   | 21.17 | 72.83 | 343 |
| Sutrushana     | Utrushana, Khujand | 40.28 | 69.63 | 29  |
| Takka          | Lahore             | 31.54 | 74.34 | 111 |
| Taksasila      | Taxila             | 33.74 | 72.78 | 93  |
| Talaqan        | Taloqan            | 36.72 | 69.52 | 36  |
| Tamralipti     | Tamluk             | 22.30 | 87.92 | 302 |
| Taras          | Taraz (Kazakh)     | 42.90 | 71.37 | 28  |
| Tirmidh        | Termez             | 37.22 | 67.28 | 32  |
| Udakhand       | Hund               | 33.89 | 72.24 | 80  |
| Udyana         | Mingora, Swat      | 34.78 | 72.37 | 83  |
| Ujjaini        | Ujjain             | 23.18 | 75.78 | 344 |
| Vaishali       | Vaishali           | 25.99 | 85.13 | 209 |
| Valabhi        | Vallabhi           | 21.89 | 71.88 | 342 |
| Varnu          | Bannu              | 32.99 | 70.62 | 352 |
| Varsa          | Varsa              | 34.00 | 71.70 | 78  |
| Vrjsthana      | Hubina (Vardak)    | 34.40 | 68.40 | 358 |
| Wakhsh         | Vakhsh             | 37.63 | 68.83 | 33  |

\*Tripitaka: Rongxi L. (tr.) (1996) *The Great Tang Dynasty Record of the Western Regions*. Numata Center Buddhist Translation, Berkeley, CA.

Table S24. Listing of vibhedas of Bharata-varsha (Skanda Purana, 1<sup>st</sup> millennium CE). –ka vibhedas are shown in bold type.

| <b>SKANDA PURANA</b> | <b>MODERN NAMES</b>         |
|----------------------|-----------------------------|
| Amala                | Andhra                      |
| Asvamukha            | Rae Bareilly, UP            |
| Atisindh             | Upper Sindh                 |
| <b>Balaka</b>        | Bahlka                      |
| Bhadra               | Bhadra, Rajasthan           |
| Cita                 | <i>unknown</i>              |
| Dahala               | Chedi, Baghelkhand          |
| Devabhadra           | <i>unknown</i>              |
| Drada                | Darada, Gilgit              |
| Ekabahudesa          | <i>unknown</i>              |
| Ekapada              | near Nepal east             |
| <b>Gajanaka</b>      | Ghazni                      |
| Gauda desa           | Bengal                      |
| Gujaratta            | Gujarat                     |
| Hariala              | Haryana                     |
| Jahahuti             | Khajuraho (Jejabhukti)      |
| Jalandhara           | Jullundhar                  |
| Jangala              | Kuru-janagla near Saraswati |
| Kaccha mandala       | Kutch                       |
| Kalanjara            | Kashmir border              |
| Kamarupa             | Assam                       |
| Kamboja              | Kamboja (Arachosia)         |
| Kamtapura            | Mirzapur, UP                |
| Kanyakubja           | Kannoj                      |
| Karnata              | Karnataka                   |
| Kasmira              | Kashmir                     |
| Kaumkana             | Konkan-N                    |
| <b>Khurasanaka</b>   | Khorasan                    |
| Kosala               | Kosala                      |
| Laghu-Kaumkana       | Konkan-S                    |
| Lata                 | Lata-Gujarat                |
| Lohapura             | Lahore                      |
| Macipura             | Kamcipura                   |
| Magadha desa         | Magadha                     |
| Malava               | Malwa                       |
| Mevada               | Mewar, Rajasthan            |
| Mulasthana           | Multan                      |
| Narendu              | Varendra                    |
| Nepala               | Nepal                       |
| Nilapura             | Kishenganga near Kashmir    |
| Nirvarta mandala     | NW Bengal                   |
| Oddiyana desa        | Swat                        |
| Pambipura            | <i>unknown</i>              |

|                     |                                      |
|---------------------|--------------------------------------|
| Pamdu               | Pandya                               |
| Pulastya visaya     | <i>unknown</i>                       |
| Rataraja            | Ratta-rajya (Rashtrakuta)            |
| <b>Romaka</b>       | Rumma-desa (Rajasthan)               |
| Samjaya             | Sanjan                               |
| Saurashtra          | Saurashtra                           |
| Sayambhara          | Sakambhara, Rajasthan                |
| Sibi desa           | Sibi/Swat                            |
| Sindhu              | Sindh                                |
| Stri-rajya          | north of Kasmir                      |
| <b>Surparaka</b>    | Sopara (Thana)                       |
| Tilanga des         | Telengana                            |
| Tomara              | Rajasthan                            |
| Vaguri              | Baged, Rajasthan                     |
| <b>Vambhanavaka</b> | Bahmanabad, Sind                     |
| Vidarbha            | Vidarbha                             |
| Virata              | Bairat, Jaipur                       |
| Yamakoti            | <i>Mythical city (east of Lanka)</i> |
| Yavana desa         | Sindh                                |

Ciancaglini C. (2012) Outcomes of the Indo-Iranian Suffix \*-ka- in Old Persian and Avestan. In: *Dariosh Studies II. Persepolis and its settlements: territorial system and ideology in the achaemenid state*. Basello GP and Rossi AV (eds) p.91-100. Naples.

Table S25. **Gotra: Percent incidence by group in major Brahmin communities.**

| Community    | Mother Tongue        | n     | G/B* | Vasishta | Bhargava | Kashyap | Angiras | Vishwamitra | Kutsa | Atri  |
|--------------|----------------------|-------|------|----------|----------|---------|---------|-------------|-------|-------|
| All Brahmins | all                  | 32182 | G    | 8.37     | 9.59     | 27.66   | 46.15   | 5.57        | 0.58  | 2.07  |
| All Brahmins | all                  | 18007 | B    | 8.55     | 8.90     | 25.08   | 49.06   | 5.91        | 0.59  | 1.91  |
| GSB          | Marathi              | 249   | G    | 21.69    | 28.11    | 9.24    | 14.46   | 22.89       | 0.40  | 3.21  |
| GSB          | Marathi              | 179   | B    | 23.46    | 18.99    | 10.61   | 14.53   | 29.05       | 0.56  | 2.79  |
| GSB          | Konkani              | 504   | G    | 16.07    | 15.28    | 18.45   | 16.07   | 5.95        | 21.83 | 6.35  |
| GSB          | Konkani              | 285   | B    | 17.89    | 15.09    | 17.89   | 12.63   | 9.47        | 20.00 | 7.02  |
| Saraswat     | Punjabi              | 200   | G    | 15.00    | 19.50    | 10.50   | 52.00   | 1.50        | 0.00  | 1.50  |
| Saraswat     | Punjabi              | 243   | B    | 20.58    | 19.75    | 9.47    | 46.91   | 2.06        | 0.00  | 1.23  |
| Audichya     | Gujarati /<br>Kutchi | 321   | G    | 9.35     | 11.21    | 17.76   | 50.47   | 10.28       | 3.43  | 0.93  |
| Audichya     | Gujarati /<br>Kutchi | 186   | B    | 11.29    | 13.98    | 13.98   | 48.92   | 11.29       | 5.38  | 0.54  |
| Nagar        | Gujarati /<br>Kutchi | 56    | G    | 19.64    | 1.79     | 55.36   | 19.64   | 1.79        | 0.00  | 1.79  |
| Nagar        | Gujarati /<br>Kutchi | 39    | B    | 23.08    | 2.56     | 41.03   | 28.21   | 5.13        | 0.00  | 0.00  |
| Jhijhotiya   | Hindi-MP             | 53    | G    | 9.43     | 1.89     | 45.28   | 33.96   | 5.66        | 0.00  | 3.77  |
| Jhijhotiya   | Hindi-MP             | 47    | B    | 8.51     | 2.13     | 31.91   | 46.81   | 8.51        | 0.00  | 2.13  |
| Deshastha    | Marathi              | 1157  | G    | 7.35     | 11.58    | 31.55   | 31.63   | 7.52        | 0.00  | 10.37 |
| Deshastha    | Marathi              | 663   | B    | 9.05     | 11.31    | 31.37   | 34.69   | 6.79        | 0.00  | 6.79  |
| Nyogi 6000   | Telegu               | 136   | G    | 27.21    | 17.65    | 10.29   | 42.65   | 1.47        | 0.00  | 0.74  |
| Nyogi 6000   | Telegu               | 40    | B    | 17.50    | 12.50    | 15.00   | 50.00   | 5.00        | 0.00  | 0.00  |
| Vaidiki      | Telegu               | 142   | G    | 27.46    | 14.08    | 21.83   | 34.51   | 2.11        | 0.00  | 0.00  |
| Vaidiki      | Telegu               | 40    | B    | 20.00    | 12.50    | 15.00   | 47.50   | 5.00        | 0.00  | 0.00  |
| Smartha      | Kannada              | 277   | G    | 14.80    | 9.39     | 31.41   | 35.02   | 8.66        | 0.36  | 0.36  |
| Smartha      | Kannada              | 109   | B    | 10.09    | 10.09    | 30.28   | 35.78   | 9.17        | 0.00  | 4.59  |
| Iyer         | Tamil                | 413   | G    | 25.42    | 15.98    | 8.47    | 31.96   | 16.22       | 0.48  | 1.45  |
| Iyer         | Tamil                | 180   | B    | 20.00    | 13.33    | 6.67    | 35.56   | 20.56       | 0.00  | 3.89  |

|             |                         |      |   |       |       |       |       |       |      |       |
|-------------|-------------------------|------|---|-------|-------|-------|-------|-------|------|-------|
| Iyengar     | Tamil                   | 170  | G | 18.24 | 24.71 | 7.65  | 31.76 | 10.00 | 0.59 | 7.06  |
| Iyengar     | Tamil                   | 42   | B | 21.43 | 21.43 | 11.90 | 33.33 | 11.90 | 0.00 | 0.00  |
| Daivadnya   | Konkani                 | 79   | G | 3.80  | 13.92 | 8.86  | 22.78 | 29.11 | 2.53 | 18.99 |
| Daivadnya   | Konkani                 | 56   | B | 5.36  | 12.50 | 12.50 | 16.07 | 32.14 | 7.14 | 14.29 |
| Karhade     | Marathi                 | 187  | G | 2.67  | 13.90 | 22.46 | 20.86 | 17.11 | 0.53 | 22.46 |
| Karhade     | Marathi                 | 130  | B | 1.54  | 20.77 | 18.46 | 26.15 | 13.08 | 0.00 | 20.00 |
| Konkanastha | Marathi                 | 409  | G | 3.42  | 9.05  | 50.12 | 8.56  | 20.54 | 0.00 | 8.31  |
| Konkanastha | Marathi                 | 259  | B | 2.70  | 6.56  | 49.03 | 11.20 | 15.44 | 0.00 | 15.06 |
| Gaur        | Hindi-Delhi             | 958  | G | 8.98  | 11.06 | 12.00 | 45.20 | 20.25 | 0.00 | 2.51  |
| Gaur        | Hindi-Delhi             | 745  | B | 10.34 | 11.95 | 10.07 | 43.62 | 21.34 | 0.00 | 2.68  |
| Gaur        | Rajasthani /<br>Marwari | 159  | G | 7.55  | 1.26  | 13.21 | 62.89 | 10.69 | 0.00 | 4.40  |
| Gaur        | Rajasthani /<br>Marwari | 93   | B | 9.68  | 1.08  | 9.68  | 64.52 | 11.83 | 0.00 | 3.23  |
| Tyagi       | Hindi-Delhi             | 172  | G | 3.49  | 22.09 | 11.05 | 42.44 | 13.95 | 0.58 | 6.40  |
| Tyagi       | Hindi-Delhi             | 75   | B | 2.67  | 13.33 | 16.00 | 41.33 | 20.00 | 0.00 | 6.67  |
| Sanadya     | Hindi-Delhi             | 166  | G | 17.47 | 1.20  | 16.27 | 57.83 | 7.23  | 0.00 | 0.00  |
| Sanadya     | Hindi-Delhi             | 103  | B | 22.33 | 0.97  | 16.50 | 55.34 | 4.85  | 0.00 | 0.00  |
| Sanadya     | Hindi-MP                | 115  | G | 20.00 | 2.61  | 26.96 | 44.35 | 6.09  | 0.00 | 0.00  |
| Sanadya     | Hindi-MP                | 64   | B | 23.44 | 1.56  | 17.19 | 53.13 | 4.69  | 0.00 | 0.00  |
| Kanyakubja  | Hindi-UP                | 845  | G | 25.44 | 3.31  | 41.18 | 28.99 | 0.95  | 0.00 | 0.12  |
| Kanyakubja  | Hindi-UP                | 567  | B | 25.57 | 4.06  | 35.63 | 33.86 | 0.88  | 0.00 | 0.00  |
| Saryuparin  | Hindi-UP                | 815  | G | 4.42  | 19.88 | 43.68 | 30.43 | 1.47  | 0.00 | 0.12  |
| Saryuparin  | Hindi-UP                | 501  | B | 8.58  | 14.77 | 45.31 | 29.34 | 1.80  | 0.00 | 0.20  |
| Bhumihar    | Hindi-UP                | 603  | G | 8.13  | 15.59 | 46.60 | 24.88 | 4.81  | 0.00 | 0.00  |
| Bhumihar    | Hindi-UP                | 290  | B | 10.00 | 15.86 | 40.34 | 28.28 | 5.52  | 0.00 | 0.00  |
| Maithil     | Bihari                  | 1122 | G | 3.39  | 28.70 | 58.56 | 8.73  | 0.62  | 0.00 | 0.00  |
| Maithil     | Bihari                  | 420  | B | 2.86  | 30.95 | 56.67 | 8.81  | 0.71  | 0.00 | 0.00  |
| All Brahmin | Bengali                 | 1981 | G | 0.76  | 1.36  | 67.19 | 29.38 | 1.16  | 0.00 | 0.15  |
| All Brahmin | Bengali                 | 1313 | B | 0.69  | 1.68  | 64.43 | 32.37 | 0.76  | 0.00 | 0.08  |

|             |                         |      |   |       |       |       |       |       |      |      |
|-------------|-------------------------|------|---|-------|-------|-------|-------|-------|------|------|
| All Brahmin | Oriya                   | 905  | G | 7.51  | 0.33  | 30.50 | 51.82 | 4.86  | 1.22 | 3.76 |
| All Brahmin | Oriya                   | 331  | B | 9.06  | 0.91  | 29.61 | 49.55 | 6.04  | 1.51 | 3.32 |
| All Brahmin | Telegu                  | 628  | G | 25.80 | 15.45 | 18.15 | 36.62 | 3.18  | 0.00 | 0.80 |
| All Brahmin | Telegu                  | 153  | B | 21.57 | 12.42 | 15.69 | 45.75 | 4.58  | 0.00 | 0.00 |
| All Brahmin | Marathi                 | 3314 | G | 7.42  | 13.25 | 31.41 | 25.50 | 12.64 | 0.12 | 9.66 |
| All Brahmin | Marathi                 | 1853 | B | 8.15  | 13.01 | 30.98 | 26.82 | 12.30 | 0.05 | 8.69 |
| All Brahmin | Hindi-MP                | 1640 | G | 14.51 | 11.77 | 33.23 | 36.04 | 3.60  | 0.00 | 0.85 |
| All Brahmin | Hindi-MP                | 954  | B | 14.78 | 13.10 | 32.29 | 35.01 | 3.35  | 0.00 | 1.47 |
| All Brahmin | Gujarati /<br>Kutchi    | 991  | G | 10.60 | 7.77  | 23.71 | 43.19 | 12.71 | 0.71 | 1.31 |
| All Brahmin | Gujarati /<br>Kutchi    | 580  | B | 10.52 | 8.97  | 18.79 | 45.86 | 14.31 | 0.69 | 0.86 |
| All Brahmin | Kannada                 | 1070 | G | 10.37 | 13.93 | 29.16 | 29.53 | 11.68 | 0.47 | 4.86 |
| All Brahmin | Kannada                 | 416  | B | 10.10 | 13.70 | 25.96 | 28.13 | 15.63 | 0.48 | 6.01 |
| All Brahmin | Rajasthani /<br>Marwari | 463  | G | 7.56  | 5.83  | 19.22 | 56.16 | 8.21  | 0.00 | 3.02 |
| All Brahmin | Rajasthani /<br>Marwari | 243  | B | 11.93 | 4.94  | 15.64 | 56.38 | 9.05  | 0.00 | 2.06 |

\*G=groom; B=bride; Gotra groups: Vasishtha (Vasisht, Parashar, Upamanyu, Kaundinya); Bhargava (Bhargava, Jamadagni, Vatsa, Srivats); Kashyap (Kashyap, Sandilya); Angiras (Bharadwaj, Gautam); Vishwamitra (Vishwamitra, Kausika); Kutsa (Kutsa, Kaunsha); Source: [www.Jeevansathi.com](http://www.Jeevansathi.com) (downloaded October 2012).

Table S26. **Tribal gene introgression from NW entry points into South Asia.** M176 (L1), M357 (L3), M241 (J2b2), M410 (J2a), M17 (R1a1) and M124 (R2) SNPs were included. Based on published genetic analyses of various communities, these SNPs together account for >90% of post-neolithic Y-haplogroup introgression from northwest entry points into South Asia [reference C]. M69 was used as an indigenous control.

| CLUSTER*    | CENSUS** | SAMPLE (n) | TRIBES | PERCENT INCIDENCE OF Y-HAPLOGROUP |      |      |      |      |      |      |
|-------------|----------|------------|--------|-----------------------------------|------|------|------|------|------|------|
|             |          |            |        | M176                              | M357 | M241 | M410 | M17  | M124 | M69  |
| INDIGENOUS  | >5%      | 679        | 16     | 1.6                               | 0.0  | 1.1  | 0.8  | 7.0  | 2.3  | 44.3 |
| OCP-CH      | >5%      | 240        | 9      | 4.3                               | 0.0  | 4.2  | 0.0  | 28.4 | 21.9 | 30.7 |
| BRW         | >5%      | 465        | 10     | 21.9                              | 0.0  | 22.9 | 0.0  | 17.7 | 3.1  | 16.0 |
| IRANIC      | >5%      | 87         | 4      | 8.3                               | 10.4 | 8.4  | 4.7  | 28.8 | 14.3 | 12.3 |
| BORDERLANDS | n.a.     | 71         | 3      | 8.0                               | 4.3  | 3.2  | 11.7 | 34.8 | 9.6  | <5   |

\* Indigenous (MP Gond, UP Gond, Koya, Bagdi, Muria, Kurumba, Halba, Santhal, Koya Dora, Hallaki, Kamar, Kharia, Bhil, Irula, Kuruba, Saharia); OCP-CH (Chamar, Chenchu, Naidu, Madiga, Ao Naga, Satnami, Dhangar, Vaish, Maratha); BRW (Yadava, UP Kol, Meghawal, Lodhi, Vellalar, Kallar, Velama, Ambalakalar, Sourashtran, Mala); Iranic (Rajput, Gurjar, Khatri, Pallan); Borderlands (Baloch, Brahui, Sindhi).

\*\* Indian census of 2010 and 1891. Each sample cluster accounts for >5% of the population in both census numbers, suggesting antiquity of the underlying introgression events.

#### REFERENCES:

[A] Wells RS, Yuldasheva N, Ruzibakiev R, Underhill PA, Evseeva I, Blue-Smith J, Jin L, Su B, Pitchappan R, Shanmugalakshmi S, Balakrishnan K, Read M, Pearson NM, Zerjal T, Webster MT, Zholoshvili I, Jamarjashvili E, Gambarov S, Nikbin B, Dostiev A, Aknazarov O, Zalloua P, Tsoy I, Kitaev M, Mirrakhimov M, Chariev A, Bodmer WF. (2001) The Eurasian heartland: a continental perspective on Y-chromosome diversity. *Proc Natl Acad Sci U S A.* 98(18): 10244-10249.

[B] Kivisild T, Rootsi S, Metspalu M, Mastana S, Kaldma K, Parik J, Metspalu E, Adojaan M, Tolk HV, Stepanov V, Gölge M, Usanga E, Papiha SS, Cinnioglu C, King R, Cavalli-Sforza L, Underhill PA, Villems R. (2003) The genetic heritage of the earliest settlers persists both in Indian tribal and caste populations. *Am J Hum Genet.* 72(2): 313-332.

[C] Sengupta S, Zhivotovsky LA, King R, Mehdi SQ, Edmonds CA, Chow CE, Lin AA, Mitra M, Sil SK, Ramesh A, Usha Rani MV, Thakur CM, Cavalli-Sforza LL, Majumder PP, Underhill PA. (2006) Polarity and temporality of high-resolution y-chromosome distributions in India identify both indigenous and exogenous expansions and reveal minor genetic influence of Central Asian pastoralists. *Am J Hum Genet.* 78(2): 202-221.

[D] Reich D, Thangaraj K, Patterson N, Price AL, Singh L. (2009) Reconstructing Indian population history. *Nature.* 461(7263): 489-494.

[E] Sharma S, Rai E, Sharma P, Jena M, Singh S, Darvishi K, Bhat AK, Bhanwer AJ, Tiwari PK, Bamezai RN. (2009) The Indian origin of paternal haplogroup R1a1\* substantiates the autochthonous origin of Brahmins and the caste system. *J Hum Genet.* 54(1): 47-55.



File S27. Religious traditions in medieval Saurashtra.

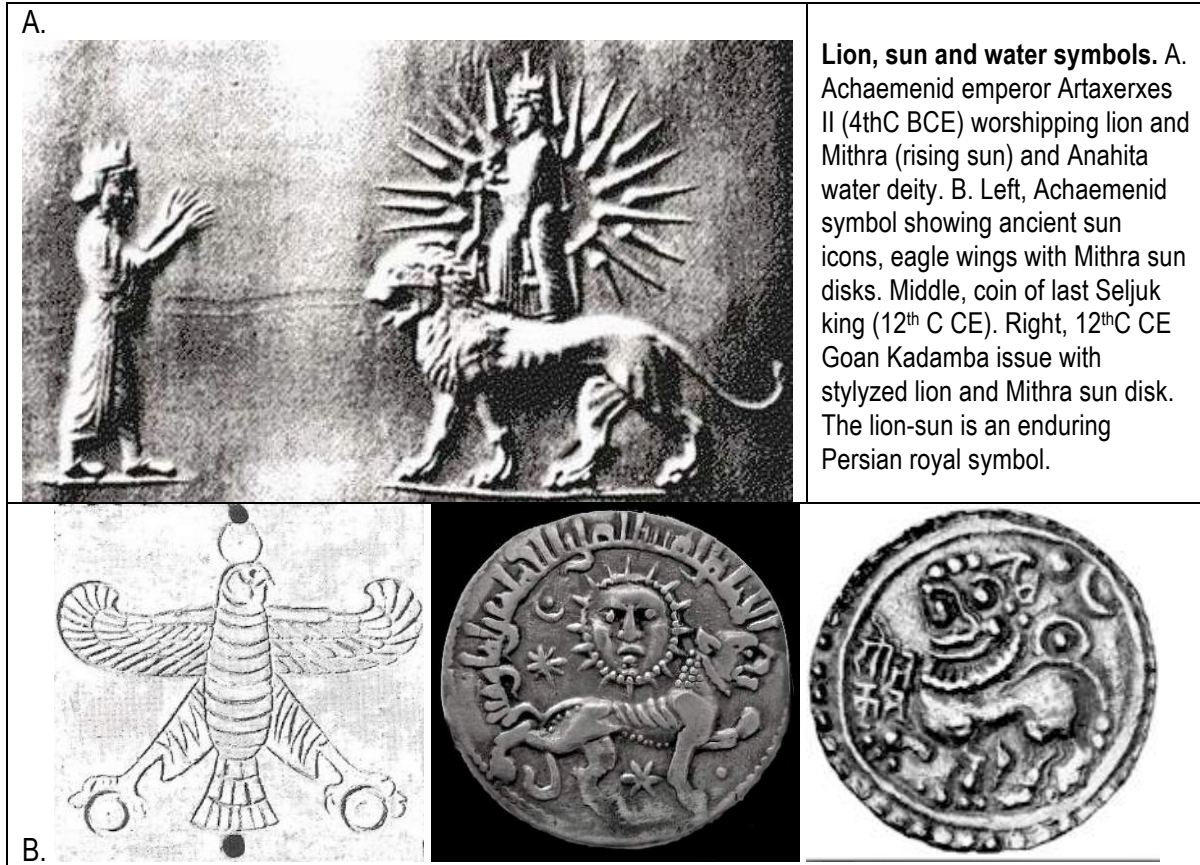

Sindh and Saurashtra have long represented a contiguous cultural domain [main text]. The coastal Sindh-Sorath region during the Harappan period of the 3<sup>rd</sup> millennium BCE has left us artifacts suggesting proto-Shaivite-Tantric religious beliefs [Supplementary files 2.07, 2.08] perhaps the predecessors of later western grassroots traditions rooted in the worship of various local tantric mother goddesses such as Chamunda and Ambaji — later co-opted into aspects of Durga — and the Pasupata-Kapalika-Nath traditions of early Shaivism. The Pasupata cult began in Somnath on the coast of Saurashtra. The Kapalika and Nath traditions also originated in Gujarat [3A]. In the centuries preceding the Common Era, sponsored by the great Mauryan Emperors Chandragupta and Ashoka, Jainism and Buddhism were grafted upon this substrate from the east. In Saurashtra, Girnar and Vallabhi became important centers, especially for heretical sects of these religions, as attested by historical councils and the testimony of the Chinese traveller Hwang Zhang in the 7<sup>th</sup> century [3B]. It appears that the western mercantile seaboard extending from Sindh and Gujarat to Cape Comorin remained largely outside of Indo-Gangetic orthodox Brahmanical influence until late medieval times [3C]. Although sun cults, totems and heroes would ultimately be absorbed into the Vaishnava tradition, Surya (Aditya) worship was clearly a distinct and influential tradition in early medieval Gujarat, as the 8<sup>th</sup> century Shankaracharya five-god Smartha prescription indicates.

From a survey [3D] of religious and totemic symbols on coins issued by independent tribes located in the Indus-Yamuna region during the Maurya-Kushana interregnum (2<sup>nd</sup> century BCE to 1<sup>st</sup> century CE) one may distinguish three non-overlapping cultural traditions: towards the easterly side, running north-south from Himachal Pradesh to Rajasthan (Kulutas, Kunindas, Vemakis,

Yaudheyas, Agras, Arjunayanas, Uddehikas, southern Sibis) one finds traditional symbols of Buddhist (Chaitya, Triratna, Tree-in-Railing) and Elephant-Humped Bull (Bull, taurine symbols) traditions. The latter has traditionally been linked to the Kapisa-Pushkalavati corridor i.e. Khyber Pass corridor [3E] and may have anchored the mainstream Shaiva-Oesho traditions patronized by the Kushana emperors and associated with the bull, a lunar symbol [3F].

The third distinct tribal numismatic culture, on the other hand (lion and water/river symbols, probably a Mitra-Varuna tradition, see below) is the most northwesterly and largely located between the Jhelum and Ravi tributaries of the Indus (Gujrat district in the Punjab) and other areas later associated with mid-1<sup>st</sup> millennium CE Gurjar settlements, including Marwar. Ancient tribes using these symbols on their coinage (Malavas, Pauravas, Audumbaras) are notable for dual attested locations north and south of the Bolan Pass. Generally speaking, these locations are close to entry points from Arachosia to Sindh, either through the Bolan Pass (Sindh-Gujarat) or the Tochi Valley (Sindh-Punjab). A southern branch of Audumbaras, for example is known from Gujarat (Kutch). They were Shaivites, based on the names of their kings and the evidence of Hwang Zhang, a Chinese pilgrim, who visited it in 639 CE [3B]. Malavas are attested both in the Punjab and in Nagaur near Marwar (an early Gurjar kingdom) and from the Saka / Gurjar domains between Brighukacha and Ujjain, which came to be known as Malwa [3H]. The Sarasvata tribe of Arachosia is not known to have issued coinage, but its provenance may be associated with the naming of Sarasvati rivers in the Punjab and Gujarat. At least some of these Iranic tribes may have used the Krta-Malava era beginning in 57-58 BCE (possibly associated with Vonones or Azes I in Arachosia; [3I]). This type of reckoning was later adopted by the Gurjara-Pratihara medieval empire. Meanwhile, by contrast, in Madhyadesa coinage of the same period, lion symbols are rare and the water/river symbol is sparingly used (though at least one example is known from Erikachcha of the Dasarna kingdom) [3P].

In order to understand the significance of the lion-water symbol complex in the northwestern regions closest to Afghanistan just prior to the start of the Common Era one must first consider the political context of the region comprising Arachosia, Sindh and Gujarat. These areas were ruled as satrapies of Achaemenid Persia in the mid-first millennium BCE. After the collapse of the Mauryan Empire in the 2<sup>nd</sup> century BCE, the tradition of rule by Afghan-Iranic overlords, including Indo-Greek, Indo-Scythian and Indo-Parthian dynasties, became a tradition to continue for another millennium. In the coinage of these dynasties prior to the Common Era, the lion symbol was clearly associated with Iranic Arachosia (Harahvati) and not Indian Gandhara [Supplementary File 2.10]. The emblematic use of Persian fire altars on coinage of Sindh and Gujarat continued until the latter part of the 1<sup>st</sup> millennium CE, and became a standard feature of coins issued by the Gurjar kingdoms.

For the significance of the lion-water symbols themselves one must therefore search within this Iranic cultural tradition. Illustration above shows examples of Persian sun and water icons beginning with the Achaemenids. As Mary Boyce has argued [3Q], the reign of Artaxerxes II (404-359 BCE) saw great turmoil between royal house and religious orthodoxy in the emperor's attempts to replace Varuna of the Mithra-Varuna tradition with the popular goddess Anahita, the Arachosian (Harahvati) deity of the waters, the Persian equivalent of the India Sarasvati. Western Kshatrapa coinage of the early centuries CE in Gujarat and Malwa employed a standardized set of numismatic symbols: Buddhist chaitya, lunar and sun symbols, and river symbol below. Presumably this set represented the major belief systems in Gujarat and Saurashtra during that period. By the 6<sup>th</sup> and 7<sup>th</sup> centuries, after the influx of Hephthalite influences through ruling Maitraka (Saurashtra), Rai (Sindh), Mihirkula (Eran) and Zunbil (Zabulistan) dynasties, northwesterly

populations carried syncretic sun worship and Shaiva traditions, *not* iconographically associated with the lunar bull. Wink has suggested that the Zamindawar (Zamin-i-Dawar) cult of Zun was a Hephthalite fusion of Shiva and Mihira sun worship [3O]. It is this syncretic substrate, along with tantric goddess cults, the heretical Buddhist sects and the Jaina traditions mentioned above, that anchored the grassroots belief systems of medieval Saurashtra. Similar beliefs predominated in Sindh. (For a review of the religious traditions in medieval Sindh, see reference 3J.) Within this catholicity, in addition to the Buddhism and Zun-Shaivism patronized by the Maitraka rulers in Vallabhi in their land grants [3B], one may distinguish three religious traditions of particular relevance to the Brahmins who may have migrated south from Saurashtra to Salcete province in 740 CE:

*The Bhagavata Tradition:* In the 1<sup>st</sup> millennium BCE, the Mahabharata places the tribes of Abhira and Sura in adjacent regions of southern Sindh and Saurashtra (Saura=sun worshipper, rashtra=country). Classical geographers refer to Sindh as Abiria [3N]. Vasudeva Krishna, the Vrishni Bhoja hero is revered by the Abhira, of which the Bhojas are a major branch. This “Bhagavata” worship of Vasudeva and his brother Balarama (Heracles, in the Hellenistic equivalent), the earliest known Vaishnavite tradition, is attested in coinage of Arachosia (7 of 22 numismatic series of Arachosia mints versus 0 of 52 series from Gandhara mints; as a control, the signature humped bull of Pushkalavati is found on 6 Gandhara series and none of the Arachosia series) between the 2<sup>nd</sup> century BCE and the 1<sup>st</sup> century CE [Supplemental File 2.09]. As the 113 BCE Heliodoros pillar erected by the ambassador from Antialcidas of Arachosia makes clear, Bhagavata was popular in Zabulistan. Dwarka, in Saurashtra, was the legendary home of Vasudeva Krishna and the Vrishni Bhojas.

*The Magian Sun Priest Tradition:* According to the Bhavishya Purana, Krishna’s son Samba brought Iranic Magian sun priests from Zabulistan (Sakadwipa) to Multan and Dwarka, as these were the only priests qualified to serve in sun temples. At the turn of the Common Era, Parthian nobles of the Suren-Pahlav clan based in Seistan controlled Arachosia. The Gondophares (Gudubaraha) dynasty of rulers may have belonged to this clan or, alternatively, to the house of Waraz. Suren and Waraz were the easternmost royal families of Parthia [3K]. The Magian sun priests of this region, Sakadwipa, according to Indian tradition, married Bhoja women and came to be known as Bhojaka. Bhojaka priests serve in both Surya and Jaina temples. Interestingly, Bhoj-wordstem toponyms show a remarkably similar distribution to the Indian provenance of early-common-era Parthian terra cotta votive tanks in the archeological record, including many Jaina Tirthas but not Buddhist monasteries [Supplemental File 2.04]. Magian sun priests accompanied Gurjar and Hephthalite Iranic tribes that entered western India in the 5<sup>th</sup> and 6<sup>th</sup> centuries CE. Among these arrivals were the Varaha (wild boar) totem tribes, precursors of the great Chalukya and Gurjara-Pratihara clans of India. These were almost certainly related to the Eastern Parthian-Hephthalite House of Waraz (Varaz=boar) [3L]. Their arrival in the western coastal towns of Saurashtra in the late fifth-early sixth century is memorialized by a unique sun temple architecture found around Dwarka, Porbandar and Somnath-Patan. Similar temple architecture can be seen in the early Chalukya capital of Aihole, Karnataka (6<sup>th</sup> century CE) and in the great Salt Range Temple complex of the same vintage [Supplemental Files 3.02 and 3.03]. The medieval Garulaka tribe of Saurashtra, which ruled coastal Saurashtra, may have been a Waraz (Varaha) tribe, as some of its kings took the title of Varahadasa. Some Magian sun priests were Brahman-ized in the 7<sup>th</sup>-8<sup>th</sup> centuries. Supplemental files 3.02-3.04 provide additional detail.

*An Emerging Goudapada Brahmanic Tradition:* The arrival of Brahmins in Salcete in 740 CE coincided with the founding of the first Math (monastery) of the emerging Advaita sect known

as Goudapada close to their new settlement at Kushasthali in Salcete. As this Brahmin community came to be known as Goud Saraswat Brahmins, it is likely that the name came from their adherence to this sect. (Other explanations for the name “Goud” have been offered, notably “from the north”, or “from Bengal”, but these explanations do not seem as persuasive.) Goudapada’s Advaita teachings became dominant in the western corridor of the subcontinent after Sankaracharya (late 8<sup>th</sup> century CE). The GSB were ardent followers of Sankaracharya’s Smartha branch of Vedanta for over 500 years, until the arrival of Madhavacharya, when some GSB converted to Vaishnavism.

If these Goud Brahmins did indeed bring their Advaita philosophy from Saurashtra to Salcete in 740 CE, one may ask about philosophical antecedents. In the earliest Goudapada work independent of the great Sankaracharya, the Gaudapadiya-Karika, the fourth prakarna contains a remarkable philosophical synthesis of the Buddhist Madhyamaka and Yogacara schools, which may well precede the Mahayana’s own syncretism of the two schools in the works of Vimuktisena (6<sup>th</sup> century CE) and Santaraksita (7<sup>th</sup> century CE). Even more remarkable, this work was written by a Vedantin, not a Buddhist [3M]. The Maitraka capital, Vallabhi, is the most likely 6<sup>th</sup> century center of learning to fit the sophistication, intellectual independence and catholicity implied by this work. If the GSB did, in fact live in Saurashtra in the 6<sup>th</sup> century, it is highly likely that their schooling and employment was in the city of Vallabhi.

#### REFERENCES

- 3A. White DG (1996) *The Alchemical Body: Siddha Traditions in Medieval India*. U. Chicago Press, p. 97.
- 3B. Rongxi L. (tr.) (1996) *The Great Tang Dynasty Record of the Western Regions*. Numata Center Buddhist Translation, Berkeley, CA.
- 3C. Thapar R. (1978) *Ancient Indian Social History: Some Interpretations*. Orient Blackswan Publications.
- 3D. Handa D. (2007) *Tribal Coins of Ancient India*. Aryan Books International, New Delhi.
- 3E. Sagar KC (1992) *Foreign Influence on Ancient India*. Northern Book Centre, New Delhi. p. 98.
- 3F. Pal P (1986) *Indian Sculpture*. Vol. I. UC Press, Los Angeles. p. 77.
- 3H. Viyogi N and Ansari MA (2010) *History of the Later Harappans and Silpakara Movement*. Kalpaz Publications, Delhi. p. 231.
- 3I. Sircar DC (1965) *Indian Epigraphy*. Motilal Banarsidass Publishers, Delhi. p. 257.
- 3J. Maclean DN (1989) *Religion and Society in Arab Sindh*. EJ Brill, Leiden.
- 3K. Curtis VS and Stewart S eds. (2007) *The Age of the Parthians*. IB Tauris & Co, London. p. 30.
- 3L. Spawforth AJS ed. (2007) *The Court and Court Society in Ancient Monarchies*. Cambridge University Press, p.66.
- 3M. King R (1995) *Early Advaita Vedanta and Buddhism: The Mahayana Context of the Gaudapadiya-Karika*. SUNY Press. p. 44.
- 3N. Schoff WH. (1912) *The Periplus of the Erythraean Sea: Travel and Trade in the Indian Ocean by a Merchant of the First Century*. Munshiram Manoharlal Publ., 2001.
- 3O. Wink A. (2002) *Al-Hind: the Making of the Indo-Islamic World*. Brill Academic Publishers.
- 3P. Bhandare S. (2006) Numismatics and History: The Maurya-Gupta Interlude. In Olivelle P. (ed) *Between the Empires: Society in India 300 BCE to 400 CE*. Oxford University Press, pp. 67-112.
- 3Q. Boyce M (1982) *A History of Zoroastrianism*, Vol II. EJ Brill, Leiden, p.247.

File S28. **Attested Mihira clan locations (5<sup>th</sup>-8<sup>th</sup> centuries CE).**

Attested locations of Iranic Hephthalite family clans and dynasties with affinity for Mihira (Mithra, sun) worship and Waraz (boar; Sanskrit “Varaha”) totem. Coinage typically shows Sassanid-style fire altar on reverse side. These rulers typically adopted the name “Aditya” (sun god, Surya) or “Mihir” (Mithra) in their royal titles, a practice significantly less common in other contemporary lineages of the subcontinent. Varaha totemic orientation is revealed in royal crests (e.g. Chalukyas) and royal names such as Varahadasa (devotee of the Boar), used by Garulaka kings. A major influx of Magian sun priests into the subcontinent (later named Maga Brahmins, Bhojakas, Sakaldwipi Brahmins) coincided with the arrival of Mihira clans.

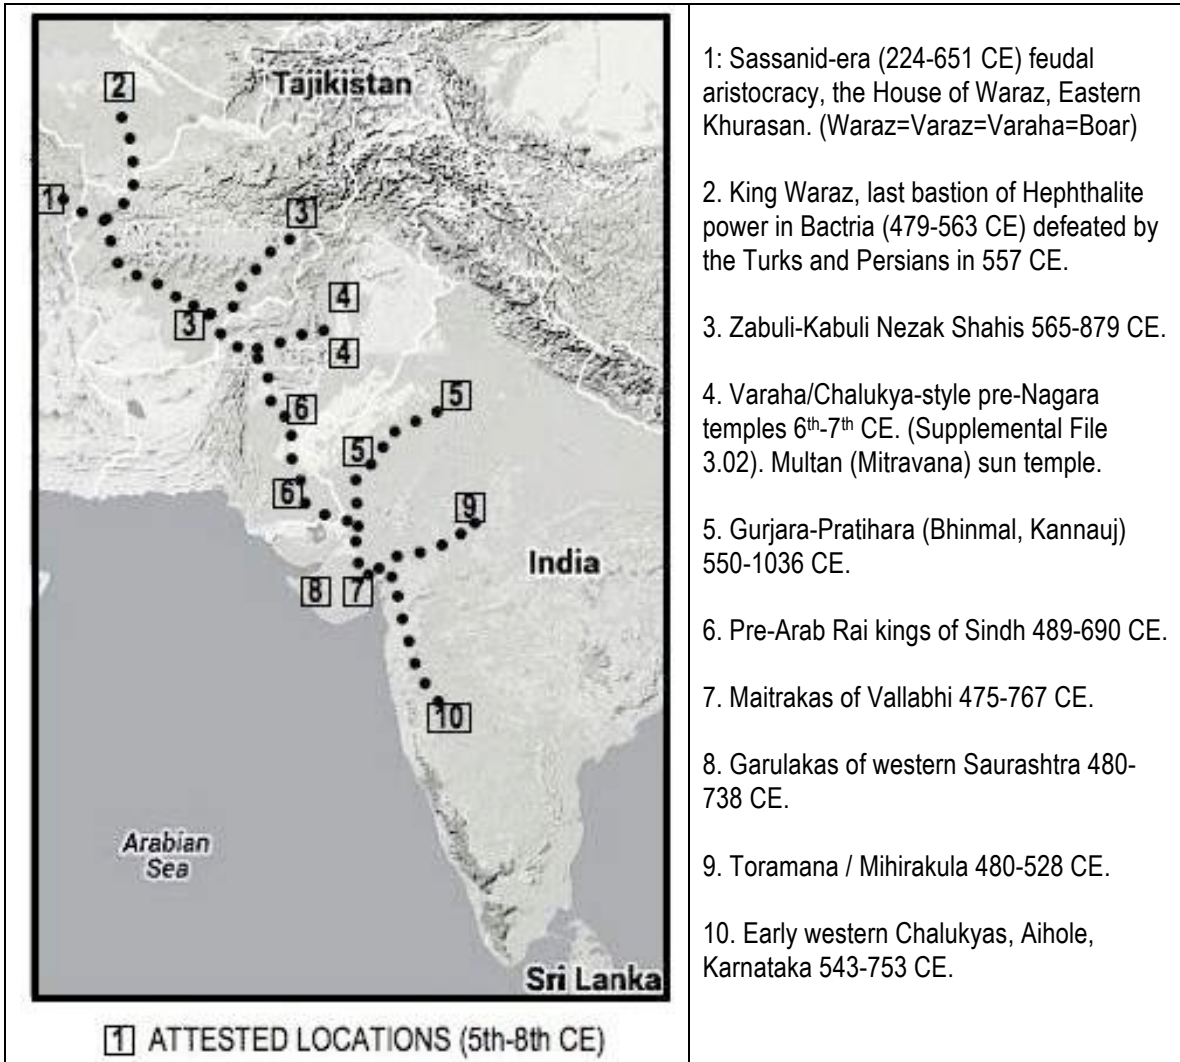

Reference: Humbach H (1978) Mithra in India and the Hinduized Magi. In: *Acta Iranica* Duchesne-Guillemin ed., Bibliothéque Pahlavi, Tehran-Liege. pp. 229-254.

Table S29. **Varaha (Chalukya) style Aditya temples.** A unique transitional pre-Nagara style of sun temple associated with 6<sup>th</sup>-7<sup>th</sup> century CE tribes associated with wild boar (Varaha, Waraz) worship has been described [reference 1, below].

| Location | State | Vintage | N | E |
|----------|-------|---------|---|---|
|----------|-------|---------|---|---|

**SALT RANGE GROUP:**

|              |        |             |       |       |
|--------------|--------|-------------|-------|-------|
| Katas        | Punjab | 6th CE      | 32.73 | 72.16 |
| Kafirkot     | Punjab | 6th-7th CE  | 34.01 | 72.45 |
| Bilot        | Punjab | 7th CE      | 32.26 | 71.08 |
| Mari Indus   | Punjab | 8th CE      | 32.95 | 71.56 |
| Kallar Kahar | Punjab | late 8th CE | 32.78 | 72.70 |
| Amb Sharif   | Punjab | 9th CE      | 32.51 | 71.94 |

**SAURASHTRA GROUP:**

|                          |         |                |       |       |
|--------------------------|---------|----------------|-------|-------|
| Gop, Dwarka              | Gujarat | 6th CE (early) | 22.23 | 68.97 |
| Bhanasara, Porbandar     | Gujarat | 625-650 CE     | 21.62 | 69.60 |
| Dhank                    | Gujarat | 6th-7th CE     | 21.77 | 70.13 |
| Somnath                  | Gujarat | 6th-7th CE     | 20.89 | 70.41 |
| Visavada, Junagadh       | Gujarat | 6th-7th CE     | 21.38 | 70.68 |
| Bileswar, Junagadh       | Gujarat | late 7th CE    | 21.68 | 69.74 |
| Pindara                  | Gujarat | 6th-7th CE     | 22.25 | 69.26 |
| Navi-Dhrewad             | Gujarat | 6th-7th CE     | 22.14 | 69.07 |
| Son-Kansari, Ghumli      | Gujarat | 6th-7th CE     | 21.77 | 70.13 |
| Harshadmata, Miyani      | Gujarat | 6th-7th CE     | 21.84 | 69.38 |
| Kin-derkheda, Porbandar  | Gujarat | 6th-7th CE     | 21.81 | 69.56 |
| Khimeswar, Porbandar     | Gujarat | 6th-7th CE     | 21.62 | 69.60 |
| Kadwar, Prabhaj-Patan    | Gujarat | late 7th       | 20.85 | 70.45 |
| Sutrapada [transitional] | Gujarat | early 8th CE   | 20.85 | 70.48 |

**CHALUKYA GROUP:**

|        |           |        |       |       |
|--------|-----------|--------|-------|-------|
| Aihole | Karnataka | 6th CE | 16.02 | 75.87 |
|--------|-----------|--------|-------|-------|

**REFERENCES:**

1. Ghosh A ed. (1961) Indian Archeology 1960-61: A Review. Janpath, New Delhi. p.75.
2. Meister MW (1996) Temples along the Indus. *Expedition* 38(3): 41-54.



Table S30. **Ramnath, Manganath, Siddhanath temples (Gujarat).** The states of Goa and neighboring GSB diaspora states of Maharashtra and Karnataka are italicized. The Manganath temple at Kushasthali, Goa is now located at Priol, Goa under the name Mangeshi. At the time of Portuguese conquest in the 16<sup>th</sup> century, records show this deity's name was Manganath. The medieval use of the –nath suffix to indicate Shiva (instead of the more conventional –eshwar) is largely limited to Gujarat.

**Location of Ramnath Temples in India**

| STATE         | TOWN                   | N     | E     |
|---------------|------------------------|-------|-------|
| GUJARAT       | Bilkha                 | 21.44 | 70.61 |
| GUJARAT       | Jetpur, Rajkot         | 21.76 | 70.62 |
| GUJARAT       | Gondal, Rajkot         | 21.98 | 70.74 |
| GUJARAT       | Sihor, Bhavnagar       | 21.71 | 71.96 |
| GUJARAT       | Rampara, Junagadh      | 20.96 | 70.96 |
| GUJARAT       | Petlad, Anand          | 22.49 | 72.78 |
| GUJARAT       | Jhagadia, Bhalod       | 21.71 | 73.15 |
| GUJARAT       | Surat                  | 21.19 | 72.83 |
| GUJARAT       | Bhuj                   | 23.27 | 69.67 |
| GUJARAT       | Vallabhipur            | 21.89 | 71.88 |
| GUJARAT       | Ahmedabad, Manek Chowk | 23.03 | 72.58 |
| GUJARAT       | Khambaliya             | 22.21 | 69.65 |
| GUJARAT       | Borsad                 | 22.42 | 72.90 |
| GUJARAT       | Makarpura, Vadodara    | 22.30 | 73.20 |
| MAHARASHTRA   | Karanaja, Badona       | 20.58 | 77.65 |
| MAHARASHTRA   | Atpadi, Sangli         | 17.26 | 74.57 |
| GOA           | Ramnathim, Ponda       | 15.39 | 73.98 |
| KARNATAKA     | Majali, Karwar         | 14.90 | 74.10 |
| KARNATAKA     | Hankon, Karwar         | 14.89 | 74.19 |
| KARNATAKA     | Madgeri, Kumta         | 14.43 | 74.41 |
| KARNATAKA     | Asnoti, Karwar         | 14.87 | 74.13 |
| KARNATAKA     | Bhaire, Karwar         | 14.99 | 74.25 |
| KARNATAKA     | Ulga, Karwar           | 14.88 | 74.24 |
| KARNATAKA     | Karkal, Udipi          | 13.20 | 74.98 |
| CHHATTISGARH  | Kanker                 | 20.27 | 81.49 |
| ODISHA        | Boudh                  | 20.82 | 84.32 |
| ODISHA        | Satpada, Balugaon      | 19.73 | 85.65 |
| UTTAR PRADESH | Varanasi               | 25.68 | 82.96 |
| TAMILNADU     | Rameshwaram            | 9.29  | 79.32 |

**Location of Manganath Temples in India**

| STATE          | TOWN                   | N     | E     |
|----------------|------------------------|-------|-------|
| GUJARAT        | Magnath Pipali village | 21.41 | 70.69 |
| GUJARAT        | Junagadh               | 21.52 | 70.47 |
| GUJARAT        | Nani Monpari           | 21.36 | 70.64 |
| MADHYA PRADESH | Shajapur               | 23.43 | 76.27 |

**Location of Siddhanath Temples in India**

| STATE            | TOWN                      | N     | E     |
|------------------|---------------------------|-------|-------|
| GUJARAT          | Dholka                    | 22.74 | 72.35 |
| GUJARAT          | Munjlav, Olpad            | 21.32 | 72.69 |
| GUJARAT          | Surat                     | 21.11 | 72.70 |
| GUJARAT          | Jamnagar                  | 22.47 | 70.07 |
| GUJARAT          | Dwarka                    | 22.24 | 68.95 |
| GUJARAT          | Somnath (Durgakut Ganesh) | 20.89 | 70.41 |
| GUJARAT          | Girnar (Revati Ganesh)    | 21.49 | 70.53 |
| GUJARAT          | Chikhli, Navsari          | 20.75 | 73.06 |
| GUJARAT          | Baroda                    | 22.31 | 73.21 |
| GUJARAT          | Bharuch                   | 21.71 | 72.99 |
| GUJARAT          | Kherva                    | 23.54 | 72.44 |
| GOA              | <i>Bori, Ponda</i>        | 15.37 | 74.04 |
| MAHARASHTRA      | Mhaswad                   | 17.64 | 74.79 |
| MAHARASHTRA      | Kharsundi                 | 17.34 | 74.88 |
| MAHARASHTRA      | Bhood                     | 17.64 | 74.79 |
| MAHARASHTRA      | Renavi                    | 17.27 | 74.65 |
| MAHARASHTRA      | Kanamadi                  | 16.83 | 75.73 |
| MAHARASHTRA      | Maan                      | 17.67 | 74.50 |
| MADHYA PRADESH   | Nemawar                   | 22.50 | 76.97 |
| MADHYA PRADESH   | Omkareshwar               | 22.24 | 76.15 |
| RAJASTHAN        | Jodhpur                   | 26.28 | 73.02 |
| HIMACHAL PRADESH | Bajjnath                  | 32.05 | 76.65 |
| UTTAR PRADESH    | Kanpur                    | 26.42 | 80.42 |
| UTTAR PRADESH    | Lucknow                   | 26.85 | 80.95 |
| UTTAR PRADESH    | Zamania, Ghazipur         | 25.50 | 83.62 |
| UTTAR PRADESH    | Jaunpur                   | 25.45 | 82.52 |
| UTTAR PRADESH    | Bahraich                  | 27.58 | 81.59 |
| UTTAR PRADESH    | Jajmau                    | 26.46 | 80.35 |
| BIHAR            | Bahadurpur, Rafiganj      | 24.85 | 84.55 |
| BIHAR            | Fatuha                    | 25.52 | 85.32 |



Table S31. **Male deities in Salcete temples in 1567.** Dark rectangles signify presence of deity, based on inventory created prior to destruction of 300+ temples by the Portuguese Inquisition in 1567.

| TOWN / VILLAGE | Narayana | Ravalnath | Other Vishnu | Siddhanath / Ganesh | Ishvar / Mahadev | Bhairava | Other Shiva |
|----------------|----------|-----------|--------------|---------------------|------------------|----------|-------------|
| Guirdolim      |          |           |              |                     |                  |          |             |
| Kudtari        |          |           |              |                     |                  |          | Chandranath |
| Macazana       |          |           |              |                     |                  |          |             |
| Mormugao       |          |           |              |                     |                  |          | Vagnath     |
| Issorcim       |          |           |              |                     |                  |          |             |
| Dabolim        |          |           |              |                     |                  |          |             |
| Vaddem         |          |           |              |                     |                  |          |             |
| Chicalim       |          |           |              |                     |                  |          |             |
| Sancoale       |          |           | Narasimha    |                     |                  |          |             |
| Kushasthali    |          |           |              |                     |                  |          | Manganath   |
| Keloshi        |          |           |              |                     |                  |          |             |
| Nagoa          |          |           |              |                     |                  |          |             |
| Verna          |          |           |              |                     |                  |          |             |
| Lotli          |          |           | Vamana       |                     |                  |          | Ramnath     |
| Raia           |          |           |              |                     |                  |          |             |
| Camorlim       |          |           |              |                     |                  |          |             |
| Racaim         |          |           | Trivikrama   |                     |                  |          |             |
| Margao         |          |           | Damodar      |                     |                  |          |             |
| Dicarpale      |          |           |              |                     |                  |          |             |
| Davorlim       |          |           |              |                     |                  |          |             |
| Pale           |          |           |              |                     |                  |          |             |
| Velcao         |          |           |              |                     |                  |          |             |
| Cansaulim      |          |           |              |                     |                  |          | Naganath    |
| Arossim        |          |           |              |                     |                  |          |             |
| Utorda         |          |           |              |                     |                  |          |             |
| Majorda        |          |           |              |                     |                  |          |             |
| Calata         |          |           |              |                     |                  |          |             |
| Seraulim       |          |           |              |                     |                  |          |             |
| Betalbatim     |          |           |              |                     |                  |          |             |
| Gandaulim      |          |           |              |                     |                  |          |             |
| Colva          |          |           |              |                     |                  |          |             |
| Benaulim       |          |           |              |                     |                  |          |             |
| Telaulim       |          |           |              |                     |                  |          |             |

|            |  |  |  |  |  |  |          |
|------------|--|--|--|--|--|--|----------|
| Orlim      |  |  |  |  |  |  |          |
| Sernabatim |  |  |  |  |  |  |          |
| Varca      |  |  |  |  |  |  |          |
| Deussua    |  |  |  |  |  |  | Loknath  |
| Carmona    |  |  |  |  |  |  |          |
| Chinchinim |  |  |  |  |  |  |          |
| Dramapur   |  |  |  |  |  |  |          |
| Sarzora    |  |  |  |  |  |  | Naganath |
| Cuncolim   |  |  |  |  |  |  |          |
| Veroda     |  |  |  |  |  |  |          |
| Duncolim   |  |  |  |  |  |  |          |
| Assolna    |  |  |  |  |  |  |          |
| Velim      |  |  |  |  |  |  |          |
| Ambelim    |  |  |  |  |  |  |          |

REFERENCE: Pissurlencar P. (1952) Tombo das Rendas que Sua Magestade tem nas terras de Salcete.  
*Boletim do Instituto Vasco da Gama* 68: 19-79.

Table S32. **First names of 16<sup>th</sup> century Lotli Brahmins.** The ratio of Shaivite to Vaishnavite first names for village council member males is shown.

| <b>FIRST NAMES</b> | <i>n</i> | <i>Shaiva::Vaishnav</i> |
|--------------------|----------|-------------------------|
| Guirdolim-Macazana | 13       | 0.00                    |
| <b>Curtorim</b>    | 31       | <b>1.79</b>             |
| <b>Raia</b>        | 57       | 0.88                    |
| <b>Loutolim</b>    | 15       | 0.79                    |
| <b>Quelossim</b>   | 10       | 0.69                    |
| <b>Cortalim</b>    | 11       | <b>3.70</b>             |
| <b>Sancoale</b>    | 9        | <b>1.39</b>             |
| Chicalim-Vaddem    | 12       | 0.00                    |
| Benaulim           | 25       | 1.19                    |
| Margao             | 25       | 0.60                    |
| VERNA-NAGOA        | 42       | 1.19                    |
|                    |          |                         |
| <b>ALL BRAHMIN</b> | 250      | 1.00                    |

REFERENCE: Pissurlencar P. (1952) Tombo das Rendas que Sua Magestade tem nas terras de Salcete. *Boletim do Instituto Vasco da Gama* 68: 19-79.

Table S33. **West-east gotra gradient.** Data are from Supplementary File 2.13. Bride and groom data for individual gotras in each community agreed closely ( $r^2=0.94$ ), providing an internal control. Based on this Distribution it is possible to map the centroid of overall gotra incidence for any Brahmin community or subgroup. The centroid thus calculated for present day Kamat GSB is 971 km east of the corresponding centroid for GSB carrying the surname of Pai (data not shown). Although this does not prove a more easterly (average) origin for Kamat GSB families, it is nevertheless consistent with such a claim.

| <b>BRAHMIN GOTRA</b>    | <b>WESTERN</b>                          | <b>CENTRAL</b>               | <b>EASTERN</b>            |
|-------------------------|-----------------------------------------|------------------------------|---------------------------|
| <b>Mother Tongues</b>   | <b>Konkani<br/>Gujarati<br/>Marathi</b> | <b>Hindi-UP<br/>Hindi-MP</b> | <b>Bengali<br/>Bihari</b> |
| <b>Sample n (G)</b>     | <b>5307</b>                             | <b>7521</b>                  | <b>4852</b>               |
| <b>Sample n (B)</b>     | <b>3132</b>                             | <b>4147</b>                  | <b>2480</b>               |
| <b>Pct Kashyap (G)</b>  | <b>7.26</b>                             | <b>18.15</b>                 | <b>20.97</b>              |
| <b>Pct Kashyap (B)</b>  | <b>7.83</b>                             | <b>18.13</b>                 | <b>20.12</b>              |
| <b>Pct Kaushik (G)</b>  | <b>22.55</b>                            | <b>12.53</b>                 | <b>3.64</b>               |
| <b>Pct Kaushik (B)</b>  | <b>23.60</b>                            | <b>11.84</b>                 | <b>2.77</b>               |
| <b>Pct Kutsa (G)</b>    | <b>33.33</b>                            | <b>0.00</b>                  | <b>0.00</b>               |
| <b>Pct Kutsa (B)</b>    | <b>32.99</b>                            | <b>0.52</b>                  | <b>0.00</b>               |
| <b>Distribution [G]</b> | <b>11.37</b>                            | <b>65.62</b>                 | <b>77.32</b>              |
| <b>Distribution [B]</b> | <b>11.24</b>                            | <b>65.78</b>                 | <b>77.36</b>              |

G=grooms; B=brides; Distribution=Kaushik+Kutsa-Kashyap; Source: Jeevansathi.com; downloaded October 2012.

Table S34. **Maithili cohort gotras (7<sup>th</sup> century)**. Bhaskaravarman land grant to 114 Maithili Brahmins in 600-650 CE in the Kamarupa kingdom.

| <i>Vedic School</i>   | <i>Gotra</i>    | <i>Donee #</i> |
|-----------------------|-----------------|----------------|
| Vajasaneya (Yajur)    | Alambayana      | 11             |
| Vajasaneya (Yajur)    | Alambayana      | 1              |
| Vajasaneya (Yajur)    | Anjirasa        | 1              |
| Chhandoga (Sama)      | Asvalayana      | 1              |
| Chhandoga (Sama)      | Bharadvaja      | 2              |
| Chhandoga (Sama)      | Bharadvaja      | 1              |
| Vajasaneya (Yajur)    | Bharadvaja      | 5              |
| Vajasaneya (Yajur)    | Bharadvaja      | 6              |
| Vajasaneya (Yajur)    | Bharadvaja      | 1              |
| Bahvrichya (Rigvedin) | Bharadvaja      | 1              |
| Vajasaneya (Yajur)    | Bharadvaja      | 1              |
| Vajasaneya (Yajur)    | Bharadvaja      | 1              |
| Vajasaneya (Yajur)    | Bharadvaja      | 1              |
| Vajasaneya (Yajur)    | Gargya          | 1              |
| Bahvrichya (Rigvedin) | Gauratreya      | 10             |
| Chhandoga (Sama)      | Gautama         | 2              |
| Vajasaneya (Yajur)    | Gautama         | 2              |
| Bahvrichya (Rigvedin) | Gautama         | 2              |
| Vajasaneya (Yajur)    | Gautama         | 1              |
| Chhandoga (Sama)      | Gautama         | 1              |
| Vajasaneya (Yajur)    | Gautama         | 1              |
| Vajasaneya (Yajur)    | Gautama/Kasyapa | 2              |
| Vajasaneya (Yajur)    | Kasyapa         | 2              |
| Bahvrichya (Rigvedin) | Kasyapa         | 1              |
| Taittiriya (Yajur)    | Kasyapa         | 1              |
| Vajasaneya (Yajur)    | Kasyapa         | 1              |
| Chhandoga (Sama)      | Katyayana       | 3              |
| Charakya (Yajur)      | Katyayana       | 1              |
| Vajasaneya (Yajur)    | Kaundinya       | 1              |
| Bahvrichya (Rigvedin) | Kausika         | 1              |
| Bahvrichya (Rigvedin) | Kausika         | 2              |
| Bahvrichya (Rigvedin) | Kausika         | 2              |
| Vajasaneya (Yajur)    | Krishnatreya    | 1              |
| Vajasaneya (Yajur)    | Maudgalya       | 2              |
| Chhandoga (Sama)      | Pankalya        | 1              |
| Charakya (Yajur)      | Parasarya       | 1              |
| Bahvrichya (Rigvedin) | Parasarya       | 1              |
| Vajasaneya (Yajur)    | Prachetasa      | 3              |
| Vajasaneya (Yajur)    | Sakatayana      | 1              |
| Vajasaneya (Yajur)    | Salankayana     | 1              |
| Vajasaneya (Yajur)    | Sandilya        | 1              |
| Vajasaneya (Yajur)    | Saunaka         | 7              |
| Bahvrichya (Rigvedin) | Saunaka         | 9              |

|                      |             |   |
|----------------------|-------------|---|
| Bahvrchya (Rigvedin) | Varaha      | 1 |
| Bahvrchya (Rigvedin) | Varaha      | 1 |
| Bahvrchya (Rigvedin) | Varhaspatya | 7 |
| Charakya (Yajur)     | Vatsa       | 2 |
| Bahvrchya (Rigvedin) | Vatsya      | 1 |
| Bahvrchya (Rigvedin) | Yaska       | 3 |
| Vajasaneya (Yajur)   | Yaska       | 1 |

Reference: XIX Epigraphica Indica pp. 115-125.

Table S35. **Orissa donee gotra listing (4th-12<sup>th</sup> centuries)**. Summary tabulation of land grants: gotras of 253 Brahmin donees receiving grants from the kings of Orissa.

| <b>Gotra</b> | <b>301-700 CE</b> | <b>701-1000 CE</b> | <b>1001-1150 CE</b> |
|--------------|-------------------|--------------------|---------------------|
| Agasti       | 0                 | 0                  | 1                   |
| Atreya       | 15                | 1                  | *                   |
| Aupamanya    | 1                 | 0                  | 1                   |
| Autathya     | 0                 | 0                  | 3                   |
| Bharadvaja   | 9                 | 20                 | 12                  |
| Barhaspatya  | 0                 | 0                  | 1                   |
| Bhargava     | 1                 | 0                  | 0                   |
| Daksa        | 0                 | 1                  | 0                   |
| Dalbhya      | 0                 | 0                  | 1                   |
| Devarata     | 1                 | 0                  | 0                   |
| Dharini      | 1                 | 0                  | 0                   |
| Gargya       | 1                 | 0                  | 3                   |
| Gautama      | 2                 | 1                  | 4                   |
| Harita       | 0                 | 1                  | 1                   |
| Jatukarnya   | 0                 | 2                  | 1                   |
| Kamakayana   | 1                 | 1                  | 0                   |
| Kanva        | 0                 | 0                  | 1                   |
| Kapisthala   | 0                 | 0                  | 1                   |
| Kasyapa      | 4                 | 3                  | 14                  |
| Katyayana    | 4                 | 1                  | 0                   |
| Kaundinya    | 4                 | 4                  | 3                   |
| Kausika      | 13                | 5                  | 13                  |
| Kautsa       | 5                 | 0                  | 1                   |
| Krsnatreya   | 0                 | 0                  | 4                   |
| Kumaraharita | 0                 | 0                  | 2                   |
| Lohita       | 0                 | 0                  | 2                   |
| Mangalya     | 0                 | 1                  | 0                   |
| Maudgalya    | 0                 | 1                  | 2                   |
| Parasara     | 12                | 4                  | 8                   |
| Sandilya     | 2                 | 3                  | 2                   |
| Savarna      | 9                 | 0                  | 0                   |
| Udavahi      | 0                 | 1                  | 0                   |
| Uluka        | 0                 | 0                  | 1                   |
| Vaisvamitra  | 0                 | 1                  | 1                   |
| Vatsa        | 19                | 10                 | 20                  |
| Vashistha    | 1                 | 1                  | 2                   |
| Vishnuvrdha  | 2                 | 0                  | 0                   |

REFERENCE: Singh U. (1994) *Kings, Brahmanas and Temples in Orissa: An Epigraphic Study AD 300-1147*. Munshiram Manoharlal Publ, New Delhi, p333-334.

Table S36. Vangor conversion rate under Portuguese Inquisition.

|         | VANGOD | FAMILY | CONVERTS: 1560-1590                                    |
|---------|--------|--------|--------------------------------------------------------|
| Raia    | 2      | KAMAT  |                                                        |
| Raia    | 10     | KAMAT  |                                                        |
| Raia    | 12     | KAMAT  |                                                        |
| Kudtari | 1      | KAMAT  |                                                        |
| Kudtari | 3      | KAMAT  |                                                        |
| Kudtari | 4      | KAMAT  |                                                        |
| Kudtari | 5      | KAMAT  |                                                        |
| Kudtari | 7      | KAMAT  |                                                        |
| Kudtari | 8      | KAMAT  |                                                        |
| Kudtari | 9      | KAMAT  |                                                        |
| Kudtari | 10     | KAMAT  |                                                        |
| Kudtari | 12     | KAMAT  |                                                        |
| Kudtari | 14     | KAMAT  |                                                        |
| Kudtari | 15     | KAMAT  |                                                        |
| Kudtari | 16     | KAMAT  |                                                        |
| Kudtari | 17     | KAMAT  |                                                        |
| Lotli   | 6      | NAYAK  |                                                        |
| Lotli   | 9      | NAYAK  |                                                        |
| Lotli   | 11     | NAYAK  |                                                        |
| Lotli   | 13     | NAYAK  | Antonio Barreto,<br>Antonio Quadros,<br>Manuel Alvares |
| Lotli   | 14     | NAYAK  |                                                        |
| Raia    | 6      | NAYAK  |                                                        |
| Raia    | 9      | NAYAK  |                                                        |
| Kudtari | 11     | NAYAK  |                                                        |
| Lotli   | 2      | PAI    | Antonio da Costa                                       |
| Lotli   | 5      | PAI    | Joao de Vargas<br>(Valladares?)                        |
| Lotli   | 7      | PAI    | Pantaleao de Sa                                        |
| Lotli   | 8      | PAI    | Jeronimo<br>Mascarenhas                                |
| Lotli   | 10     | PAI    | Pedro Colaco                                           |
| Lotli   | 12     | PAI    |                                                        |
| Raia    | 1      | PAI    |                                                        |
| Raia    | 3      | PAI    |                                                        |
| Raia    | 4      | PAI    | Francisco de Lima                                      |
| Raia    | 5      | PAI    | Pero Parras                                            |
| Raia    | 8      | PAI    | Antonio da Costa                                       |
| Raia    | 11     | PAI    | Antonio Moniz                                          |
| Raia    | 13     | PAI    |                                                        |
| Kudtari | 2      | PAI    |                                                        |
| Kudtari | 6      | PAI    |                                                        |
| Kudtari | 13     | PAI    |                                                        |
| Kudtari | 18     | PAI    |                                                        |



|                 |          |               |  |
|-----------------|----------|---------------|--|
| <b>Loutolim</b> | <b>3</b> | <b>SHENAI</b> |  |
| <b>Loutolim</b> | <b>4</b> | <b>SHENAI</b> |  |
| <b>Loutolim</b> | <b>1</b> | <b>KINI</b>   |  |
| <b>Raia</b>     | <b>7</b> | <b>MALO</b>   |  |

REFERENCE: Gracias JBA. (1934) Os Primeiros Cristaos em Salcete. *Oriente Portugues*. 6: 306-337.

Table S37. **Presumed godfathers of converts prior to 1590.** By custom, early converts took the first and last name of their Portuguese godfather, usually a priest (in Salcete, Jesuit). As the colonial community was small, as Jesuit records show, the names were unique for that period.

| Conversion Date | Father (Vangor) | Convert                    | Presumed godfather                                                                                                                                                                                                                                              | Visited Goa |
|-----------------|-----------------|----------------------------|-----------------------------------------------------------------------------------------------------------------------------------------------------------------------------------------------------------------------------------------------------------------|-------------|
| Pre-1586        | Ram Pai (2)     | Antonio da Costa           | P. Antonio Da Costa (left Lisbon aboard the S. Filipe 1 April 1555); Reitor de Sao Paulo 23 Jun 1567; d. 1578;                                                                                                                                                  | 1567-1578   |
| Pre-1586        | Narna Pai (5)   | Joao de Vargas / Valadares | Unknown                                                                                                                                                                                                                                                         | unknown     |
| Pre-1586        | Santo Pai (7)   | Pantalliao de Sa           | D. Pantalliao de Sa (Goa 1577- ) sea captain, royal family, left Lisbon 1548 for Lourenco Marques, then Ormuz in 1551; Goa in 1577)                                                                                                                             | 1577-1586   |
| 1576-1586       | Nar Pai (8)     | Jeronymo Mascarenhas       | D. Jeronymo Mascarenhas (Goa 1583-1593), captain of fleet, veteran of Bacaim, Ormuz, Malabar, Sangicer, Indonesia); made bequest to Jesuits for construction of Bom Jesus Cathedral;                                                                            | 1576-1593   |
| 1560-1571       | Anta Pai (10)   | Pero Colaco                | P. Pero Collaco; Portuguese b 1531-2; Second vicar of Rachol (1562 to 1565); later Orlim (1568) and died in the siege of Chaul (1571);                                                                                                                          | 1562-1566   |
| Post-1586       | Dassu Pai (12)  | Baltezar de Araujo?        | Baltezar de Araujo, Procurador do Colegio de Sao Paulo 1567;                                                                                                                                                                                                    | 1565-1577   |
| 1560-1577       | Rama Nayak (13) | Antonio Quadros            | P. Antonio de Quadros (Capitania 1 April 1555); 1528-1572; nat Santarem son of Andre de Quadros; joined SJ at 18; blue blood; 14 yrs Provincial (1558-1572);                                                                                                    | 1560-1572   |
| 1560-1577       | Rama Nayak (13) | Manuel Alvares             | P. Manoel Alvares; (1527-1571; joined SJ 1549) Jewish convert; celebrated painter arr. Goa 1562-64; painted "Conversion of St. Paul" over main altar of St. Paul's church completed 1572; survived shipwreck of S. Paulo ship 1561 off Sumatra, DI vol 91 p.94; | 1564-1571   |
| Pre-1586        | Rama Nayak (13) | Antonio Barreto            | D. Antonio Moniz Barreto, experienced & successful conquistador; Gov. Gen. Goa 9 Dec 1573 - Sept 1576);                                                                                                                                                         | 1573-1576   |

REFERENCES:

1. Monumenta historica Societatis Iesu. Vols. 83-96: Documenta Indica (1561-1588). Wicki, Josef, ed.
2. Gracias JBA. (1934) Os Primeiros Cristaos em Salcete. *Oriente Portugues*. 6: 306-337.

Table S38. Ordination of catholic priests of Lotli town (18<sup>th</sup>-20<sup>th</sup> century)

| Year | Name                                 | Father                       | Mother                    | Family      |
|------|--------------------------------------|------------------------------|---------------------------|-------------|
| 1758 | Antonio Francisco Xavier da Costa    | Miguel da Costa              | Rosa de Noronha           | COSTA       |
| 1758 | Jose Manuel Gomes                    | Agostinho Gomes              | Senhorinha Menezes        | GOMES       |
| 1758 | Joao Antonio Francisco Gracias       | Andre Gracias                | Leonora Vas               | GRACIAS     |
| 1758 | Rafael Gracias                       | Jose Gracias                 | Sebastiana Fernandes      | GRACIAS     |
| 1758 | Caetano Xavier de Mendonca           | Custodio de Mendonca         | Rosa Carvalho             | MENDONCA    |
| 1759 | Jacome Tolentino Alvares             | Albano Alvares               | Emerciana Pimenta         | ALVARES     |
| 1759 | Antonio Baltazar Rodrigues Faria     | Manoel de Faria              | Antonia Rodrigues         | FARIA       |
| 1759 | Joao Pereira                         | Luis Pereira                 | Brigida Torrado           | PEREIRA     |
| 1759 | Cosme Damiao de Figueiredo e Pereira | Joao de Figueiredo e Pereira | Ana Barreto               | PEREIRA     |
| 1759 | Pedro Paulo Sobrinho                 | Custodio Sobrinho            | Querobina Baptista        | SOBRINHO    |
| 1760 | Pedro Paulo Alvares                  | Caetano Alvares              | Rufina de Araujo          | ALVARES     |
| 1760 | Jose Mascarenhas                     | Pedro Mascarenhas            | Joana Pereira             | MASCARENHAS |
| 1760 | Jose Caetano de Miranda              | Luis de Miranda              | Isabel Mazarelo           | MIRANDA     |
| 1760 | Antonio Jose de Noronha              | Caetano de Noronha           | Benedita Colaco           | NORONHA     |
| 1760 | Manuel Salvador de Rego              | Caetano do Rego              | Marcelina de Andrade      | REGO        |
| 1765 | Micael Arcaujo de Araujo             | Lourenco de Araujo           | Bibiana de Melo           | ARAUJO      |
| 1765 | Bartolomeu Mascarenhas               | Antonio Joao Mascarenhas     | Rosalia de Rebelo         | MASCARENHAS |
| 1765 | Francisco Manuel Mascarenhas         | Damiao Mascarenhas           | Bernarda de Quadros       | MASCARENHAS |
| 1765 | Antonio Joao Sobrinho                | Custodio Sobrinho            | Querobina Baptista        | SOBRINHO    |
| 1766 | Francisco Carvalho                   | Sebastiao Carvalho           | Florenca Dias             | CARVALHO    |
| 1766 | Manuel Rosario de Quadros            | Salvador Antonio Quadros     | Maria De Miranda          | QUADROS     |
| 1767 | Pedro Roque Estanislau Barreto       | Teotonio Barreto             | Jacinta de Figueiredo     | BARRETO     |
| 1768 | Antonio Xavier de Miranda            | Joao de Miranda              | Maria de Nazare           | MIRANDA     |
| 1769 | Vicente Manoel Barreto               | Bartolomeu Barreto           | Isabel Fernandes          | BARRETO     |
| 1769 | Rosario Deodato de Figueiredo        | Sebastiao de Figueiredo      | Agada de Figueiredo       | FIGUEIREDO  |
| 1769 | Jose Joaquim de Figueiredo           | Caetano de Figueiredo        | Petornila Pereira         | FIGUEIREDO  |
| 1769 | Pedro Menezes                        | Aleixo de Menezes            | Rita Celestina de Menezes | MENEZES     |
| 1770 | Diogo Vicente Monteiro               | Pedro Paulo Monteiro         | Maria de Jesus            | MONTEIRO    |
| 1771 | Jose Manuel Alvares                  | Sebastiao Alvares            | Maria Conceicao Barreto   | ALVARES     |
| 1771 | Antonio Manoel da Cruz               | Domingos da Cruz             | Angela da Cruz            | CRUZ        |
| 1771 | Antonio Paulo Pereira                | Lauriano Pereira             | Peregrina Rodrigues       | PEREIRA     |
| 1772 | Jose Sebastiao Bernardo Alvares      | Antonio Manoel Alvares       | Pedrinha Goncalves        | ALVARES     |

|      |                                         |                                    |                             |             |
|------|-----------------------------------------|------------------------------------|-----------------------------|-------------|
| 1772 | Jose Francisco de Figueiredo            | Aleixo Nicolau de Figueiredo       | Joana de Noronha            | FIGUEIREDO  |
| 1772 | Filipe Pedro Gracias                    | Miguel Gracias                     | Ursula Cardoso              | GRACIAS     |
| 1772 | Joao Baptista de Miranda                | Bonifacio de Miranda               | Isabel da Cunha             | MIRANDA     |
| 1772 | Jose Lourenco Valadares                 | Mateus Valadares                   | Benedita Tavares            | VALADARES   |
| 1773 | Paulo Rosario Gracias                   | Domingos Felipe Gracias            | Micaela Vas                 | GRACIAS     |
| 1780 | Jose Conceicao de Miranda               | Caetano de Miranda                 | Vitoria de Figueiredo       | MIRANDA     |
| 1786 | Jose Custodio de Jesus Maria Clemente   | Urbano Caetano Clemente            | Arcangela Rebelo            | CLEMENTE    |
| 1786 | Miguel do Rosario Santiago de Miranda   | Inocencio de Miranda               | Rita Vas                    | MIRANDA     |
| 1789 | Antonio Filipe Santiago Pereira         | Joao Baptista Pereira              | Ana Francisco de Menezes    | PEREIRA     |
| 1795 | Antonio Caetano de Noronha              | Jose Benedito de Noronha           | Ana Vitoria de Moreira      | NORONHA     |
| 1796 | Francisco Mariano de Miranda            | Bonifacio de Miranda               | Isabel de Cunha             | MIRANDA     |
| 1797 | Luis Caetano Gabriel de Figueiredo      | Antonio Nicolau de Figueiredo      | Maria Esperanca de Melo     | FIGUEIREDO  |
| 1799 | Joao Camilo da Costa                    | Custodio Manoel da Costa           | Sebastiana Rufina Pereira   | COSTA       |
| 1799 | Caetano Francisco Pereira               | Jose Vicente Pereira               | Petornila Coutinho          | PEREIRA     |
| 1801 | Caetano Rosario da Costa                | Jose Salvador da Costa             | Ursula de Araujo            | COSTA       |
| 1802 | Caetano Gabriel Arcanjo Mascarenhas     | Pedro Paulo do Rosario Mascarenhas | Rosa Conceicao Mascarenhas  | MASCARENHAS |
| 1802 | Antonio Bras de Rosario e Miranda       | Nicolau Miranda                    | Conceicao Rebelo            | MIRANDA     |
| 1802 | Caetano Joao Pereira                    | Antonio Pereira                    | Ana Alvares                 | PEREIRA     |
| 1803 | Eusebio Micael Mascarenhas              | Pascoal do Rosario Mascarenhas     | Sebastiana Pereira          | MASCARENHAS |
| 1804 | Pedro Custodio Camilo Barreto           | Luis Barreto                       | Rita Maria Colaco           | BARRETO     |
| 1804 | Jose Francisco do Rosario Clemente      | Manoel Francisco Clemente          | Ana Maria Viegas            | CLEMENTE    |
| 1804 | Luis Caetano de Figueiredo              | Vicente Joao de Figueiredo         | Ana Secunda Xavier da Costa | FIGUEIREDO  |
| 1807 | Luis Caetano da Silva                   | Lourenco da Silva                  | Aurora Cristina Colaco      | SILVA       |
| 1808 | Justo Sebastiao Alvares                 | Antonio Nicolau Alvares            | Teresa Maria Moreira        | ALVARES     |
| 1808 | Custodio Goncalo de Araujo              | Caetano Jose de Araujo             | Angela Esperanca Gracias    | ARAUJO      |
| 1808 | Antonio Salvador de Araujo              | Menino Peregrino de Araujo         | Josefa Maria Lume de Araujo | ARAUJO      |
| 1809 | Joaquim Francisco Piedade de Figueiredo | Vicente Joao de Figueiredo         | Ana Secunda Xavier da Costa | FIGUEIREDO  |
| 1810 | Inacio Tolentino Camilo Clemente        | Gaspar Clemente                    | Rita Pacheco                | CLEMENTE    |
| 1815 | Vicente Mariano Barreto                 | Deodato Francisco Barreto          | Margarida Xavier Pereira    | BARRETO     |

|      |                                                   |                                        |                                      |             |
|------|---------------------------------------------------|----------------------------------------|--------------------------------------|-------------|
| 1815 | Roque Constancio da Costa                         | Roque da Costa                         | Frutuosa Viegas                      | COSTA       |
| 1815 | Urbano Caetano Clemente Faria                     | Manoel Xavier de Faria                 | Rita Esperanca Parras                | FARIA       |
| 1818 | Jose Manoel Gomes                                 | Antonio Nicolau Gomes                  | Angela Teresa Benta Correa           | GOMES       |
| 1818 | Miguel Filipe de Quadros                          | Antonio Joao de Quadros                | Maria Benta da Piedade de Souza      | QUADROS     |
| 1821 | Pedro Alcantara de Quadros                        | Antonio Joao de Quadros                | Maria Benta da Piedade de Souza      | QUADROS     |
| 1822 | Gabriel Caetano do Rosario Mascarenhas            | Damiao Vicente Mascarenhas             | Rita Eugenia Alvares                 | MASCARENHAS |
| 1822 | Joao Baptista Maximo do Rosario Miranda           | Antonio Francisco de Miranda           | Rosa Ana Xavier da Costa             | MIRANDA     |
| 1832 | Vitor Mariano Benedito de Araujo                  | Joaquim Lourenco de Araujo             | Maria Josefa de Brito                | ARAUJO      |
| 1832 | Sebastiao Inacio Caetano de Figueiredo            | Cosme Damiao Mariano de Figueiredo     | Maria Conceicao de Figueiredo        | FIGUEIREDO  |
| 1832 | Joao Monteiro                                     | Custodio Manoel Monteiro               | Joaquina Aurora Gracias              | MONTEIRO    |
| 1834 | Joao Otono da Conceicao e Araujo                  | Frederico Guilherme de Souza e Araujo  | Maria Josefa Manoel Piedade da Costa | ARAUJO      |
| 1845 | Agostinho Monica de Conceicao e Noronha           | Miguel Jose de Noronha                 | Anastasia Barbosa                    | NORONHA     |
| 1849 | Domingos Caetano Barreto                          | Adeodato Francisco Barreto             | Margarida Xavier Pereira             | BARRETO     |
| 1853 | Jose Tomas Casimiro de Anunciacao Barreto         | Domingos Caetano Barreto               | Maria Estela Aurora Colaco           | BARRETO     |
| 1853 | Filipe Neri da Costa                              | Francisco Xavier da Costa              | Micaela Esperanca da Costa           | COSTA       |
| 1853 | Joaquim Francisco Fortunato do Rosario Figueiredo | Antonio Camilo da Conceicao Figueiredo | Rosalia Piedade Barreto              | FIGUEIREDO  |
| 1853 | Gabriel Vitorino Bernardo Felipe Neri Figueiredo  | Francisco Caetano Figueiredo           | Micael Arcangela Pinto               | FIGUEIREDO  |
| 1853 | Joao Jose Augusto Xavier de Miranda               | Custodio do Rosario Piedade Miranda    | Ana Rita Especiosa Estibeiro         | MIRANDA     |
| 1853 | Vicente Salvador dos Milagres Monteiro            | Nicolau Xavier Monteiro                | Emerenciana Severina Faleiro         | MONTEIRO    |
| 1853 | Joaquim Jose Piedade Sobrinho                     | Sebastiao Diniz Sobrinho               | Maria Esperanca Figueiredo           | SOBRINHO    |
| 1863 | Caetano Jose de Figueiredo                        | Jose Joaquim da Piedade Figueiredo     | Ana Florinda Rosalia de Menezes      | FIGUEIREDO  |
| 1864 | Basilio Joao Cosme Piedade Barreto                | Domingos Caetano Barreto               | Maria Estela Aurora Colaco           | BARRETO     |
| 1864 | Daniel Caetano da Costa                           | Sebastiao dos Remedios e Costa         | Ana Rita Arcangela de Figueiredo     | COSTA       |
| 1864 | Joao Otono de Sa                                  | Joao Gabriel de Sa                     | Marcelina Vas                        | DE SA       |
| 1864 | Joaquim Mariano S. Ana de Figueiredo              | Jose Joaquim de Figueiredo             | Maria Felicidade do Rosario da Graca | FIGUEIREDO  |
| 1864 | Evaristo Mariano de Figueiredo                    | Jose Joaquim da Piedade Figueiredo     | Ana Florinda Rosalia de Menezes      | FIGUEIREDO  |

|      |                                                      |                                                    |                                                 |            |
|------|------------------------------------------------------|----------------------------------------------------|-------------------------------------------------|------------|
| 1865 | Custodio do Rosario<br>Caetano Barreto               | Luis Antonio Barreto                               | Rita Severina Faleiro                           | BARRETO    |
| 1866 | Antonio Constancio<br>Sebastiao Salvador da<br>Costa | Joaquim Vicente<br>Miguel da Costa                 | Eufregina Felicidade<br>Monteiro                | COSTA      |
| 1866 | Francisco Salvador de<br>Figueiredo                  | Jose Joaquim da<br>Piedade Figueiredo              | Ana Florinda Rosalia<br>de Menezes              | FIGUEIREDO |
| 1866 | Tomas Aquino Mariano de<br>Figueiredo                | Antonio Gregorio dos<br>Santos Figueiredo          | Rofina Quiteria da<br>Silva                     | FIGUEIREDO |
| 1866 | Joao Salvador Gracias                                | Antonio Caetano<br>Gracias                         | Ana Rita de Souza                               | GRACIAS    |
| 1866 | Antonio Visitacao de Ave<br>Maria Monteiro           | Francisco Xavier da<br>Piedade Monteiro            | Prudencia Teresa<br>Rosario Gracias             | MONTEIRO   |
| 1867 | Roque Hermenegildo<br>Salvador Barreto               | Rosario Constancio<br>S. Ana Barreto               | Maria Avelina<br>Rozina Monteiro                | BARRETO    |
| 1867 | Romualdo Valeriano de<br>Menezes                     | Joaquim Esmeraldo<br>de Menezes                    | Eufrasia Monica<br>Ascencao<br>Mascarenhas      | MENEZES    |
| 1876 | Antonio Inacio Carvalho                              | Jose Francisco<br>Carvalho                         | Rosa Deodata<br>Ferrao                          | CARVALHO   |
| 1879 | Jose Manoel Constancio<br>Gomes                      | Luis Xavier Salvador<br>Gomes                      | Maria Esmeralda<br>Rosalia Felicidade<br>Colaco | GOMES      |
| 1879 | Joaquim dos Milagres da<br>Conceicao Pimenta         | Manoel Salvador<br>Pimenta                         | Ana Maria Pimenta                               | PIMENTA    |
| 1879 | Pedro Alcantara Lamartine<br>Quadros                 | Miguel Antonio<br>Quadros                          | Ana Quiteria<br>Piedade Xavier                  | QUADROS    |
| 1879 | Manoel Salvador<br>Nascimento Vas                    | (not recorded)                                     | (not recorded)                                  | VAS        |
| 1881 | Matias Camilo Barreto                                | Deodato Francisco<br>Antonio Barreto               | Orfelina da Silva                               | BARRETO    |
| 1881 | Roque Redualdo das Neves<br>e Costa                  | Antonio Jose<br>Anunciacao da Costa                | Rosa da Piedade<br>Menezes                      | COSTA      |
| 1881 | Custodio Salvador<br>Domiciano Miranda               | Antonio Francisco<br>Jose Piedade<br>Miranda       | Rita Maria<br>Conceicao Correa                  | MIRANDA    |
| 1881 | Jose Agostinho Monteiro                              | Vicente Custodio<br>Monteiro                       | Maria Francisca da<br>Cruz                      | MONTEIRO   |
| 1881 | Cipriano Manoel Mariano da<br>Sacra Familia Sobrinho | Jose Caetano<br>Sobrinho                           | Ana Rita Aleluia<br>Soares                      | SOBRINHO   |
| 1883 | Rafael Xavier Roque Jose<br>de Figueiredo            | Salvador do Rosario e<br>Figueiredo                | Maria Expectacao de<br>Araujo                   | FIGUEIREDO |
| 1883 | Jose Salustiano Boaventura<br>Monteiro               | Francisco Xavier da<br>Piedade Monteiro            | Prudencia Teresa<br>Rosario Gracias             | MONTEIRO   |
| 1883 | Pedro Floriano da Piedade<br>Vas                     | Domingos Santana<br>Vas                            | Ana Patrocinia<br>Sobrinho                      | VAS        |
| 1885 | Roque da Piedade Gracias                             | Joaquim Sebastiao<br>Rosario da Piedade<br>Gracias | Maria Lucia da<br>Santa Trindade<br>Borges      | GRACIAS    |
| 1885 | Joao Francisco Sebastiao<br>Xavier da Silva          | Salvador da Piedade<br>da Silva                    | Maria Barbina<br>Colaco                         | SILVA      |
| 1886 | Inacio Francisco de Santana<br>Costa                 | Antonio Jose<br>Anunciacao da Costa                | Rosa da Piedade<br>Menezes                      | COSTA      |

|      |                                                                                    |                                                            |                                                   |             |
|------|------------------------------------------------------------------------------------|------------------------------------------------------------|---------------------------------------------------|-------------|
| 1886 | Jose Manoel Nicolau<br>Nepomuceno Francisco<br>Xavier do Rosario Milagres<br>Gomes | Jose Vicente Gomes                                         | Maria Idultrides<br>Pereira                       | GOMES       |
| 1887 | Jose das Augustias<br>Sacramento Francisco<br>Xavier S. Ana Barreto                | Adeodato Francisco<br>Antonio Barreto                      | Julia Orfelina da<br>Silva                        | BARRETO     |
| 1887 | Pascoal S. Ana Roque do<br>Rosario Colaco                                          | Manoel Xavier Colaco                                       | Maria Piedade de<br>Quadros                       | COLACO      |
| 1887 | Custodio do Rosario<br>Quadros                                                     | Jose Rosario dos<br>Remedios Quadros                       | Maria Josefa Lume<br>de Arcanjo                   | QUADROS     |
| 1888 | Custodio Goncalo de Araujo                                                         | Vitor Maximo Micael<br>de Araujo                           | Ana Rita Pereira                                  | ARAUJO      |
| 1888 | Jose Francisco Eduardo<br>Navarro Lobo                                             | Joaquim Santana<br>Constancio Isac Lobo                    | Rita Aleluia Monteiro                             | LOBO        |
| 1894 | Sebastiao Francisco<br>Anselmo Damasceno de<br>Araujo                              | Roque de Santana<br>Lourenco Araujo                        | Quiteria Piedade<br>Pereira                       | ARAUJO      |
| 1894 | Joao Vicente Francisco<br>Xavier de Menezes                                        | Camilo Vicente de<br>Exaltacao Menezes                     | Escolastica Severina<br>do Rosario Cardoso        | MENEZES     |
| 1897 | Henrique Caetano Vitor de<br>Figueiredo                                            | Jose Antonio de<br>Figueiredo                              | Matilde Sebastiana<br>da Costa                    | FIGUEIREDO  |
| 1897 | Jeronimo Pantaleao de<br>Miranda                                                   | Manoel Salvador<br>Joaquim Santana<br>Sebastiao de Miranda | Ana Joaquina<br>Florenca Barreto                  | MIRANDA     |
| 1897 | Caetano Francisco Platinho<br>do Rosario Monteiro                                  | Inacio Francisco<br>Monteiro                               | Ana Clarina de<br>Quadros                         | MONTEIRO    |
| 1897 | Arcanjo Antonio do Rosario<br>Vas                                                  | Caetano Vicente Vas                                        | Emilia Severina<br>Quadros                        | VAS         |
| 1898 | Custodio da Piedade<br>Pimenta                                                     | Remedio Baltazar<br>Pimenta                                | Ana Joaquina<br>Quiteria<br>Mascarenhas           | PIMENTA     |
| 1900 | Jose Avelino Joaquim<br>Sebastiao das Dores e<br>Menezes                           | Jose Avelino<br>Menezes                                    | Maria Felicidade<br>Rodrigues                     | MENEZES     |
| 1901 | Caetano Francisco Xavier<br>Lucio Pedro Damiao Araujo                              | Caetano Joao de<br>Araujo                                  | Maria Caetana<br>Idalina de Santa Rita<br>Viegas  | ARAUJO      |
| 1904 | Gabriel Joao Clementino<br>Sebastiao Valadares                                     | Joao Constancio<br>Santana Valadares                       | Ana Francisca<br>Etelvina Pimenta                 | VALADARES   |
| 1909 | Bernardo Anacleto Joaquim<br>de Figueiredo                                         | Antonio Gabriel de<br>Figueiredo                           | Ermelinda Parras                                  | FIGUEIREDO  |
| 1909 | Hipolito Francisco Juveniano<br>Mascarenhas                                        | Vicente Caetano das<br>Angustias<br>Mascarenhas            | Rita Severina do<br>Rosario Costa                 | MASCARENHAS |
| 1909 | Custodio Piedade Francisco<br>Monteiro                                             | Jose Xavier Monteiro                                       | Maria Liberata<br>Caridade Araujo                 | MONTEIRO    |
| 1909 | Vicente Francisco Rosario<br>da Piedade Monteiro                                   | Esmeraldo Olegario<br>Monteiro                             | Maria Leocadia da<br>Piedade Gregolina<br>Rebello | MONTEIRO    |
| 1910 | Joao Celestino do Rosario<br>Piedade Figueiredo                                    | Francisco Antonio de<br>Figueiredo                         | Quiteria Faleiro                                  | FIGUEIREDO  |

|      |                                                   |                                         |                                          |             |
|------|---------------------------------------------------|-----------------------------------------|------------------------------------------|-------------|
| 1910 | Aleixo Santa Rita da Piedade Monteiro             | Rosario Agostinho da Exaltacao Monteiro | Maria Angelica Herminia da Piedade Costa | MONTEIRO    |
| 1918 | Francisco Xavier Inacio Santana Colaco            | Filipe Salvador Roque Sebastiao Colaco  | Maria Matildes Generosa Gracias e Colaco | COLACO      |
| 1921 | Manoel Salvador dos Milagres Pimenta              | Erasmio Sebastiao Pimenta               | Hermenegilda Dias                        | PIMENTA     |
| 1922 | Constancio Floriano Faria                         | Jose Xavier Gelasio de Anunciacao Faria | Luisa Maria Ermelinda Colaco             | FARIA       |
| 1923 | Emiliano Salvador Sebastiao dos Milagres Monteiro | Sebastiao Xavier Feliciano Monteiro     | Ana Joaquina Dulcina Da Cunha            | MONTEIRO    |
| 1924 | Bismarck Salisburi Antonio Garibaldi Mascarenhas  | Sebastiao Constancio Mascarenhas        | Maria Clotildes Amelina Fernandes        | MASCARENHAS |
| 1925 | Francisco Xavier Colaco                           | (not recorded)                          | (not recorded)                           | COLACO      |
| 1760 | Filipe Caetano Soares                             | Antonio Soares                          | Paula de Orta                            | SOARES      |
| 1765 | Miguel Antonio de Fonseca                         | Ambrosio da Fonseca                     | Paula Benedita Moniz                     | FONSECA     |
| 1804 | Inacio Francisco Xavier da Fonseca                | Francisco Xavier da Fonseca             | Benedita Baptista                        | FONSECA     |
| 1847 | Lopo Jose Joao dos Reis                           | Bernardo dos Reis                       | Maria Liberata Pereira                   | REIS        |
| 1853 | Joao Vicente Avelino da Fonseca                   | Jose Salvador das Mercês da Fonseca     | Querobina Josefa dos Reis                | FONSECA     |
| 1864 | Caetano Salvador Roque Joaquim de Andrade         | Jose Santana de Andrade                 | Maria Joaquina Rodrigues                 | ANDRADE     |
| 1865 | Sebastiao Xavier Damasceno Tavares                | Inacio Antonio Tavares                  | Damiana Francisca Pedrosa                | TAVARES     |
| 1867 | Filipe Manoel dos Reis                            | Jose Joaquim Filipe dos Reis            | Maria Aurora Rodrigues                   | REIS        |
| 1881 | Joaquim do Rosario Idalino Socorro Albano Torrado | Sebastiao Milagres Cipriano Torrado     | Maria Pulqueria da Cunha                 | TORRADO     |
| 1881 | Julio Avertano Torrado                            | Caetano Lourenco Torrado                | Celestina Pereira                        | TORRADO     |
| 1883 | Manoel do Rosario Jorge                           | Aleixo Cristovao Jorge                  | Maria Angelina Anunciacao Tavares        | JORGE       |
| 1887 | Damaso Sertorio Misquita                          | Remedios Benjamim Misquita              | Maria Francisca Figueiredo               | MISQUITA    |
| 1887 | Adolfo Antonio Tavares                            | Jose Caetano Tavares                    | Maria Esperanca da Cruz                  | TAVARES     |
| 1904 | Lopo Jose dos Reis                                | Jose Bernardo dos Reis                  | Josefina Apolonia da Costa Reis          | REIS        |
| 1765 | Joao de Siqueira                                  | Caetano de Siqueira                     | Maria Fernandes                          | SIQUEIRA    |
| 1766 | Pedro Paulo Baptista                              | Antonio Baptista                        | Teresa da Cruz                           | BAPTISTA    |
| 1772 | Bernardo Jose Antonio Baptista                    | Roque Baptista                          | Rita Barbosa                             | BAPTISTA    |
| 1780 | Rosario Salvador Cardoso                          | Custodio Cardoso                        | Esperanca de Noronha                     | CARDOSO     |
| 1798 | Inacio Francisco Fernandes                        | Francisco Xavier Fernandes              | Violante Maria do Rosario                | FERNANDES   |
| 1801 | Camilo Caetano Piedade Baptista                   | Roque Baptista                          | Cristina Dias das Neves                  | BAPTISTA    |



|      |                                          |                                     |                                           |           |
|------|------------------------------------------|-------------------------------------|-------------------------------------------|-----------|
| 1806 | Miguel Baptista                          | Luis Antonio Baptista               | Feliciano Pascoela Mascarenhas            | BAPTISTA  |
| 1824 | Joaquim Vicente Salvador Fernandes       | Filipe Neri Fernandes               | Rita da Piedade Rodrigues                 | FERNANDES |
| 1826 | Sebastiao Xavier Cardoso                 | Mariano Camilo Cardoso              | Severina Gomes                            | CARDOSO   |
| 1853 | Antonio Caetano da Piedade Baptista      | Francisco Pinto Simao Bras Baptista | Maria Conceicao Rodrigues                 | BAPTISTA  |
| 1866 | Sebastiao Piedade das Mercês Faleiro     | Eusebio Nicolau Faleiro             | Esperanca Barreto                         | FALEIRO   |
| 1867 | Antonio Manuel de Santa Cruz Fernandes   | Francisco Xavier Fernandes          | Maria Esperanca Xavier                    | FERNANDES |
| 1879 | Jose Custodio Fernandes                  | Francisco Xavier Fernandes          | Maria Esperanca Xavier                    | FERNANDES |
| 1881 | Caetano Sebastiao Cardoso                | Jose Xavier Cardoso                 | Maria Anunciacao Vas                      | CARDOSO   |
| 1883 | Pedro paulo da Piedade dos Remedios Mota | Narciso Santa Ana Mota              | Caetana Maria Purificacao                 | MOTA      |
| 1888 | Francisco Xavier Faleiro                 | Jose Sebastiao Luciano Faleiro      | Rita Piedade Amatildes Faleiro            | FALEIRO   |
| 1891 | Nicolau Sebastiao Joaquim Faleiro        | Caetano Salvador do Rosario Faleiro | Ana Maria Monteiro                        | FALEIRO   |
| 1900 | Sebastiao Caetano Piedade Cota           | Sebastiao Caetano da Piedade Cota   | Ana Maria Leonora Amanda Corina Abranches | COTA      |
| 1905 | Ildefonso da Piedade Cota                | Sebastiao Caetano da Piedade Cota   | Ana Maria Leonora Amanda Corina Abranches | COTA      |
| 1906 | Francisco Xavier Fernandes               | Joaquim Salvador Pascoal Fernandes  | Ismenia Aurora Esperanca Barreto          | FERNANDES |

REFERENCE: Vaz FX (1925) *Monumenta Goana Ecclesiastica*. Tipografia Braganca & Co, Nova Goa.

Table S39. Vangor extinction rate.

**Extinction of Brahmin Vangods in Salcete (1848)\***

|             | Kms (distance) | Original | Extant |
|-------------|----------------|----------|--------|
| Kushasthali | 0              | 24       | 7      |
| Quelossim   | 4              | 8        | 3      |
| Nagoa       | 6              | 14       | 7      |
| Verna       | 7              | 48       | 29     |
| Margao      | 16             | 28       | 22     |
| Benaulim    | 21             | 12       | 10     |
| Raia        | 21             | 14       | 12     |
| Lotli       | 25             | 14       | 13     |
| Kudtari     | 26             | 27       | 25     |

**Vangod Survival Rate (1848-present)**

| VANGODS (#) | TOWN    | 1848* | 1930-50** |
|-------------|---------|-------|-----------|
| LPK (7)     | LOTLI   | 85.7  | 71.4      |
| KAMAT (11)  | KUDTARI | 100.0 | 100       |

\*1848 data from: Xavier PN. (1907) Bosquejo Historico das Comunidades. Tipografia Rangel, Bastorá.

\*\*1930-1950 data from baptismal records

\*\*\*2012 data from electoral rolls

Table S40. Economic elites in South Asia.

| Community         | Census 1891 | Census 2001 | Pct. Executives* | Ratio** |
|-------------------|-------------|-------------|------------------|---------|
| <b>All Hindus</b> | 77.80       | 80.50       | 87.97            | 1.09    |
| <b>Brahmin</b>    | 5.55        | 5.16        | 36.26            | 7.02    |
| <b>Khatri ^</b>   | 0.51        | 0.54        | 16.28            | 30.04   |
| <b>Kayastha</b>   | 0.84        | 0.66        | 9.59             | 14.63   |
| <b>Lingayat</b>   | 0.25        | 0.80        | 0.55             | 0.68    |
|                   |             |             |                  |         |
| <b>Muslims</b>    | 12.86       | 13.40       | 1.12             | 0.08    |
| <b>Christians</b> | 0.86        | 2.30        | 5.40             | 2.35    |
| <b>Jains</b>      | 0.53        | 0.40        | 1.79             | 4.48    |
| <b>Parsis</b>     | 0.03        | 0.01        | 2.34             | 379.8   |

\*Combined: (Public & Private Sector) Chairman, President, Managing Director, General Manager, Director, Executive Director (Goyal, 1990)

\*\*Ratio of actual incidence to expected incidence

^ Census combines Arora and Khatri communities

Reference: Goyal S (1990) Social background of Indian corporate executives. In M.S.A. Rao & Francine Frankel (eds.) *Dominance and state power in modern India: Decline of a social order* (pp.535-544). Delhi, India: Oxford University Press.

File S41. **Western cultural corridor in ancient times.**

A.

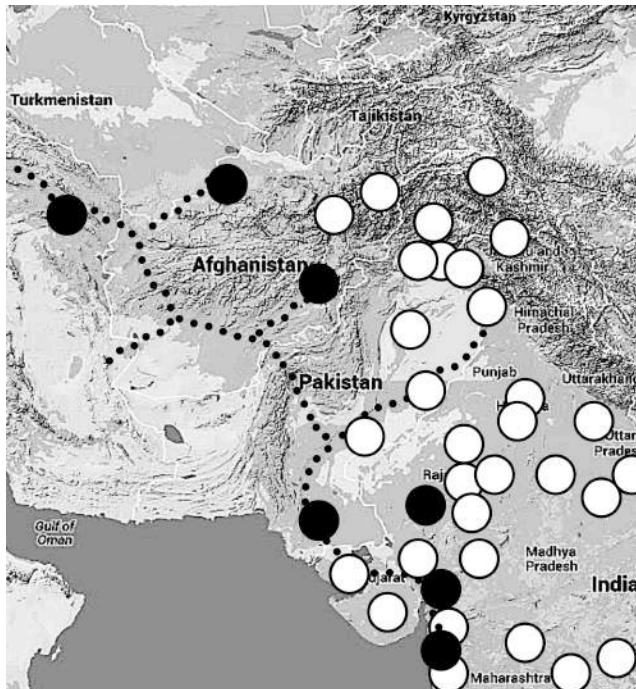

B.

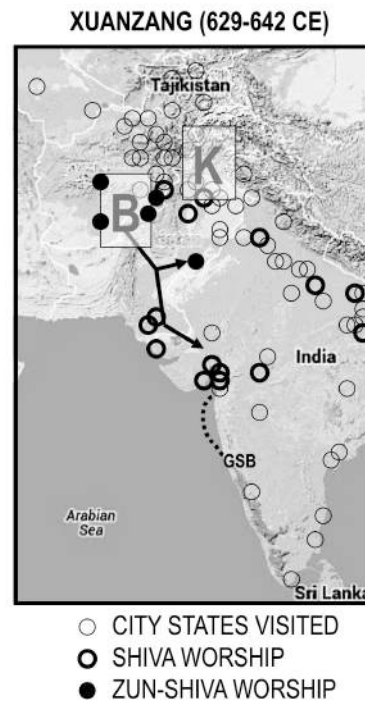

A. The first millennium CE Skanda Purana lists 72 territories (vibhedas) of India. Their location is shown by circles in the illustration. Among these are several territories with names ending with the suffix *-ka* (black circles), an orthodox Avestan and Vedic ethnonym designating “foreign-ness” [Ciancaglioni C, 2012; Supplemental File S24]. The territory surrounding Barygaza, the major port of Gujarat at the beginning of the Common Era, was known as Ariaka [Schoff, 1912]. B. In his religious census, the 7<sup>th</sup> century Chinese traveller Xuanzang documented Shiva worship and Zun-Shiva worship primarily in the northwestern regions of the subcontinent in 629-642 CE [Rongxi L, 1996; Supplemental File S23].

Ciancaglioni C. (2012) Outcomes of the Indo-Iranian Suffix *\*-ka-* in Old Persian and Avestan. In: Dariosh Studies II. Persepolis and its settlements: territorial system and ideology in the achaemenid state. Basello GP and Rossi AV (eds) p.91-100. Naples.

Rongxi L. (tr.) (1996) The Great Tang Dynasty Record of the Western Regions. Numata Center Buddhist Translation, Berkeley, CA.

Schoff WH. (1912) *The Periplus of the Erythraean Sea: Travel and Trade in the Indian Ocean by a Merchant of the First Century.* Munshiram Manoharlal Publ., 2001.

File S42: Western cultural corridor: Mitra-Varuna tradition of Kaundinya gotra.

A.

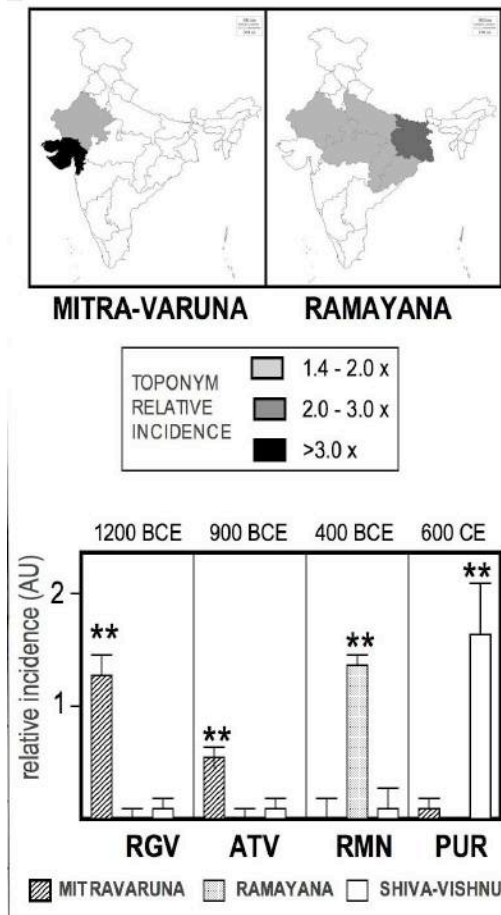

B.

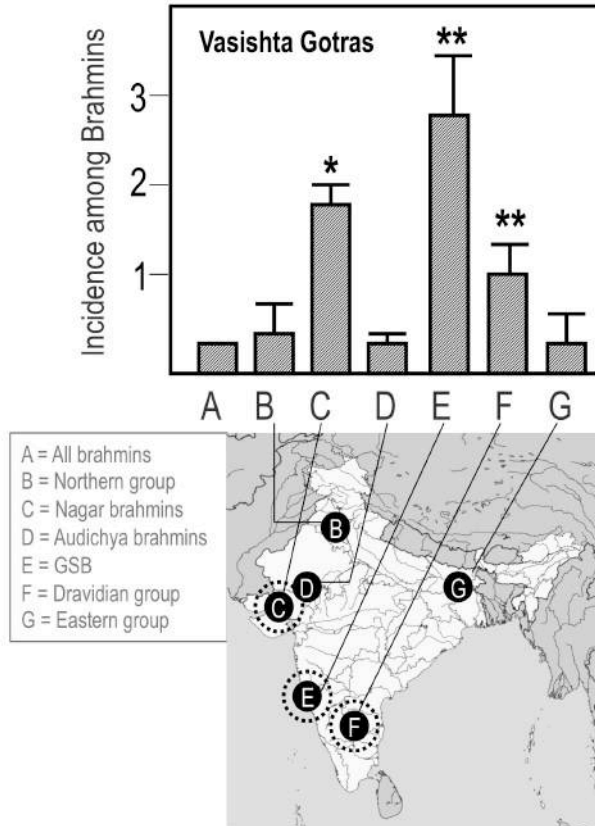

A. 2<sup>nd</sup> millenium toponymic footprint: Relative incidence of toponyms (Suppl. File S17) was corrected for the geographic incidence of deity or epic hero-related toponyms in the 20 major states and expressed as a ratio to the expected national incidence. The relative incidence of the same word-stems (plus Shiva and Vishnu) was tabulated in ancient texts for the period from 1200 BCE to 600 CE (lower panel; see Suppl. File S21 for raw data). RGV=Rigveda; ATV=Atharvaveda; RMN=Ramayana; PUR=Puranas. Toponyms of Mitra, an Iranic and early Vedic sun god, are strongly associated with the Gujarat entry point to the subcontinent, whereas toponyms of the Ramayana epic tradition (attested ca. 400 BCE) appear associated with OCP-CH domains. As the Iranic god Mitra fell out of favor with the orthodox literary establishment in India during the first millenium BCE based on relative incidence of word stems in ancient texts (lower panel) the geographic distribution of Mitra toponyms suggests a timing of settlement prior to the first millennium BCE.

B. Relative incidence of Vasishtha group of gotras among geographically dispersed Brahmin communities, expressed as a multiple of the national average. Each bar is an average of brides and grooms from a matrimonial web site (Suppl. File S25). Patronage of Iranic tribes by the sage Vasishtha (a central identity in a Mitra-Varuna tradition to which the LPK community's Kaundinya gotra belongs) is attested in the major ancient Indian epics, the Mahabharata and Ramayana. The above illustration shows that the westerly incidence of Vasishtha gotras remains significantly ( $p < 0.05$ ) above the national average.

File S43: Saurashtran centers of worship and Arab invasions in the 8<sup>th</sup> century CE.

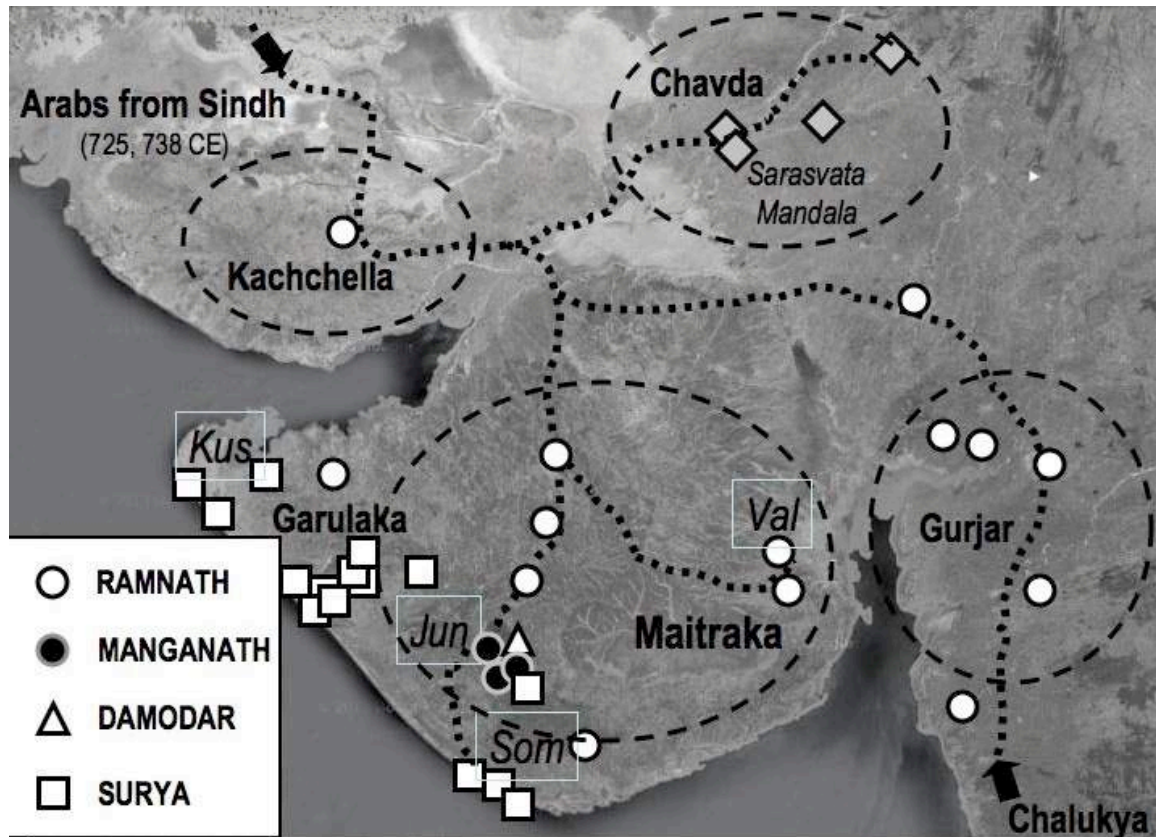

Places of worship in the putative medieval origin of Brahmin migrants to Salcete are shown by white circles and squares. With the exception of a few temples of later vintage in and around Goa, the only known places of worship dedicated to Ramnath (Lotli) and Manganath (Kushasthali) north of Maharashtra are in Saurashtra. These two male clan deities were installed in the earliest Brahmin settlements of 8<sup>th</sup> century CE Salcete. [Supplemental Files S27, S28, S29, S30, S31]. The presumed route of armed land invasions of the subcontinent by Muslim Arabs (notably in 725 and 738 CE, while Al-Junayd was emir of Sindh) is shown by the dotted line, along with kingdoms (dashed ovals) mentioned by Arab chroniclers. The up-arrow shows where the Arabs were routed by the Chalukya Pulakesi in 738-739 CE, according to the detailed account in the Navsari Plates [reference 1, below]. The invasions destroyed Vallabhi, the Maitraka capital, the most likely location of employment for Brahmins who emigrated south in 740 CE, almost certainly embarking from the port of Somnath-Patan. Chavda Gurjars (Chardo) may have migrated south at a later date (diamond symbols show location of early Chavda settlements). Kus=Kushasthali/Dwarka; Jun=Junagadh; Som=Somnath-Patan; Val=Vallabhi;

Reference 1: "Early Chalukyas of Gujarat", June 14, 2011 issue.  
<http://inscriptions.whatisindia.com/kalachuri-chedi/kalachuri-chedi-part1/earlychalukyasofgujarat.html>
